# Supplementary material for: Asymmetries of cattle and crop productivity and efficiency during Brazil’s agricultural expansion from 1975 to 2006
Source: Oxford University Press journal article supplement (doi:10.1525/elementa.187), 2018-01-01
Supplement: elementa-6-187-s2.xlsx [file elementa-6-187-s2.xlsx]

## Sheet: ReadMe
	Asymmetries of cattle and crop productivity and efficiency during Brazil´s agricultural expansion from 1975 to 2006
	Database, equations and results
	1) This spreadsheet presents all data, equations and results used to elaborate the paper. Below is a short and broad description of the data presented in each tab of this spreadsheet. We recommend users to read the main manuscript and especially the supplemental materials before working with this spreadsheet.
	2) All model equations are retrieving data from the tab "DB_Census_State" and converting agricultural products and by-products to functional elements (protein, gross energy and metabolizable energy) based on the factors and coefficients presented in the tab "FE_ConversionFactors". The tab "FE_ConversionFactors" also presents the coefficients used to allocate products and by-products to feed, food…
	3) The results of agricultural products and by-products conversion to functional elements can be observed in the tab "DB_FEConversion", which is the table used to determine the functional elements production (tab "DB_ProductionFE") and utility (tab "DB_UtilityFE").
	4) Contact for doubts and questions regarding this spreasheet: vinicius@imaflora.org
	5) Tabs descriptions:
	Name	Description
	Index_variables	Sumarizes all analysed variables and specifies their codification (abbreviations), description and units
	FE_ConvertionFactors	Contains all the factors and coefficients used to convert the main agricultural products and its by products to protein, gross energy and metabolizable energy
	DB_Census_State	Database from the Brazilian Agricultural Census. It contains the input data for the calculation tables
	DB_FEConversion	Table that individually converts all the agricultural products and its by products to protein, gross energy and metabolizable energy
	DB_ProductionFE	Functional elements production for each agricultural product
	DB_ProductionFE_fromUtility	Functional elements production for each agricultural product, obtained based on the sum of functional elements utility (as described in SM)
	DB_UtilityFE	Functional elements utility for each agricultural product
	Results_Crop&Beef	Comparison between functional elements production of crops and beef from cattle, bufaloes, horses, dunkeys and mules
	Results_Crop&Pasture	Comparison between functional elements utility of crops and pasture based agricultural products. Results include white meat from pigs and chickens, milk and eggs
	Results_Feed2WhiteMeat	Estimation of white meat production if all feed was destined to pigs and chickens
	Results_Feed&Food	Shares of crop allocated as feed and food
	Pasture_milkShare	Hidden tab. It describes the share of milk that is produced from both grazing and feed.

## Sheet: Pasture_milkShare
CODST	STATE	PASTURE_MILK_SHARE	FEED_MILK_SHARE
11	Rondônia	1	0
12	Acre	1	0
13	Amazonas	1	0
14	Roraima	1	0
15	Pará	1	0
16	Amapá	1	0
17	Tocantins	1	0
21	Maranhão	1	0
22	Piauí	1	0
23	Ceará	1	0
24	Rio Grande do Norte	1	0
25	Paraíba	1	0
26	Pernambuco	0.967594	0.032406
27	Alagoas	0.956254	0.0437457
28	Sergipe	1	0
29	Bahia	1	0
31	Minas Gerais	0.849157	0.150843
32	Espírito Santo	1	0
33	Rio de Janeiro	1	0
35	São Paulo	0.90941	0.0905903
41	Paraná	0.737629	0.262371
42	Santa Catarina	0.635822	0.364178
43	Rio Grande do Sul	0.611267	0.388733
50	Mato Grosso do Sul	1	0
51	Mato Grosso	1	0
52	Goiás	0.968549	0.0314505
53	Distrito Federal	0.852294	0.147706

## Sheet: Index_variables
ID	TAB NAME	VARIABLE CODIFICATION	VARIABLE DESCRIPTION
1	All tabs	CODST	Oficial codification number of Brazilian States
2	All tabs	STATE	Name of Brazilian States
3	All tabs	YEAR	Year of data collection
4	All tabs	REGION	Name of the Brazilian Political Administrative Region where the referred State belongs to
5	DB_Census_State	USOPERMAR	Land Use - Hectares - Crops - Permanent - Area of agricultural establishments
6	DB_Census_State	USOTEMPAR	Land Use - Hectares - Crops - Temporary - Area of agricultural establishments
7	DB_Census_State	USOAGRICOLA	Land Use - Hectares - Agricultural Use
8	DB_Census_State	PASTNATAR	Land Use - Hectares - Natural Pasture - Area of agricultural establishments
9	DB_Census_State	PASTPLANAR	Land Use - Hectares - Planted Pasture - Area of agricultural establishments
10	DB_Census_State	PASTTOTAR	Land Use - Hectares - Total Pasture - Area of agricultural establishments
11	DB_Census_State	USOMATANAR	Land Use - Hectares - Natural Forest - Area of agricultural establishments
12	DB_Census_State	USOMATAPAR	Land Use - Hectares - Planted Forest - Area of agricultural establishments
13	DB_Census_State	EEBOVINC	Stocking Rate - Cattle - Heads of Cattle
14	DB_Census_State	EEBUBANC	Stocking Rate - Bulls - Heads of Bulls
15	DB_Census_State	EECAPRINC	Stocking Rate - Goats - Heads of Goats
16	DB_Census_State	EEOVINONC	Stocking Rate - Sheeps - Heads of Sheeps
17	DB_Census_State	EEEQUINC	Stocking Rate - Horses - Heads of Horses
18	DB_Census_State	EEASININC	Stocking Rate - Donkeys - Heads of Donkeys
19	DB_Census_State	EEMUARENC	Stocking Rate - Mules - Heads of Mules
20	DB_Census_State	EFANIMATOT	Stocking Rate - Animals on Pasture (except swines and chickens)
21	DB_Census_State	EESUINOSNC	Stocking Rate - Swines - Heads of swines
22	DB_Census_State	EEAVESNC	Stocking Rate - Chickens - Heads of chickens
23	DB_Census_State	LEITEVPL	Production - Animal Production - Milk from cattle - Liters
24	DB_Census_State	LEITECPL	Production - Animal Production - Milk from goats and sheeps - Liters
25	DB_Census_State	OVOSPU	Production - Animal Production - Eggs from chickens - Units
26	DB_Census_State	ALGODAOAC	Production - Hectares - Harvested Area - Cotton
27	DB_Census_State	ARROZAC	Production - Hectares - Harvested Area - Rice
28	DB_Census_State	BANANAAC	Production - Hectares - Harvested Area - Banana
29	DB_Census_State	CACAUAC	Production - Hectares - Harvested Area - Cocoa
30	DB_Census_State	CAFEAC	Production - Hectares - Harvested Area - Coffee
31	DB_Census_State	CANAAC	Production - Hectares - Harvested Area - Sugarcane
32	DB_Census_State	FEIJAOAC	Production - Hectares - Harvested Area - Common Beans
33	DB_Census_State	LARANJAAC	Production - Hectares - Harvested Area - Orange
34	DB_Census_State	MANDIOCAAC	Production - Hectares - Harvested Area - Cassava
35	DB_Census_State	MILHOAC	Production - Hectares - Harvested Area - Maize
36	DB_Census_State	SOJAAC	Production - Hectares - Harvested Area - Soybean
37	DB_Census_State	TRIGOAC	Production - Hectares - Harvested Area - Wheat
38	DB_Census_State	ALGODAOPT	Production - Tonnes - Cotton
39	DB_Census_State	ARROZPT	Production - Tonnes - Rice
40	DB_Census_State	BANANAPT	Production - Tonnes - Banana
41	DB_Census_State	CACAUPT	Production - Tonnes - Cocoa
42	DB_Census_State	CAFEPT	Production - Tonnes - Coffee
43	DB_Census_State	CANAPT	Production - Tonnes - Sugarcane
44	DB_Census_State	FEIJAOPT	Production - Tonnes - Common Beans
45	DB_Census_State	LARANJAPT	Production - Tonnes - Orange
46	DB_Census_State	MANDIOCAPT	Production - Tonnes - Cassava
47	DB_Census_State	MILHOPT	Production - Tonnes - Maize
48	DB_Census_State	SOJAPT	Production - Tonnes - Soybean
49	DB_Census_State	TRIGOPT	Production - Tonnes - Wheat
50	DB_FEConversion	ALGBY1_PR	Cotton - By-Product 1 (Cotton oil) - Protein content (tonnes)
51	DB_FEConversion	ALGBY2_PR	Cotton - By-Product 2 (Cotton meal) - Protein content (tonnes)
52	DB_FEConversion	ALGHR1_PR	Cotton - Field Residue 1 (Cotton straw) - Protein content (tonnes)
53	DB_FEConversion	ALGHR2_PR	Cotton - Field Residue 2 (Cotton leaves) - Protein content (tonnes)
54	DB_FEConversion	ALGBY1_GE	Cotton - By-Product 1 (Cotton oil) - Gross energy content (Giga joules)
55	DB_FEConversion	ALGBY2_GE	Cotton - By-Product 2 (Cotton meal) - Gross energy content (Giga joules)
56	DB_FEConversion	ALGHR1_GE	Cotton - Field Residue 1 (Cotton straw) - Gross energy content (Giga joules)
57	DB_FEConversion	ALGHR2_GE	Cotton - Field Residue 2 (Cotton leaves) - Gross energy content (Giga joules)
58	DB_FEConversion	ALGBY1_ME	Cotton - By-Product 1 (Cotton oil) - Metabolizable energy content for humans (Giga joules)
59	DB_FEConversion	ALGBY2_DE	Cotton - By-Product 2 (Cotton meal) - Metabolizable energy content for animals (Giga joules)
60	DB_FEConversion	ARRBY1_PR	Rice - By-Product 1 (Rice grain) - Protein content (tonnes)
61	DB_FEConversion	ARRBY2_PR	Rice - By-Product 2 (Rice bran) - Protein content (tonnes)
62	DB_FEConversion	ARRBY3_PR	Rice - By-Product 3 (Rice broken) - Protein content (tonnes)
63	DB_FEConversion	ARRBY4_PR	Rice - By-Product 4 (Rice hulls) - Protein content (tonnes)
64	DB_FEConversion	ARRHR1_PR	Rice - Field Residue 1 (Rice straw) - Protein content (tonnes)
65	DB_FEConversion	ARRBY1_GE	Rice - By-Product 1 (Rice grain) - Gross energy content (Giga joules)
66	DB_FEConversion	ARRBY2_GE	Rice - By-Product 2 (Rice bran) - Gross energy content (Giga joules)
67	DB_FEConversion	ARRBY3_GE	Rice - By-Product 3 (Rice broken) - Gross energy content (Giga joules)
68	DB_FEConversion	ARRBY4_GE	Rice - By-Product 4 (Rice hulls) - Gross energy content (Giga joules)
69	DB_FEConversion	ARRHR1_GE	Rice - Field Residue 1 (Rice straw) - Gross energy content (Giga joules)
70	DB_FEConversion	ARRBY1_ME	Rice - By-Product 1 (Rice grain) - Metabolizable energy content for humans (Giga joules)
71	DB_FEConversion	ARRBY2_DE	Rice - By-Product 2 (Rice bran) - Metabolizable energy content for animals (Giga joules)
72	DB_FEConversion	ARRBY2_ME	Rice - By-Product 2 (Rice bran) - Metabolizable energy content for humans (Giga joules)
73	DB_FEConversion	ARRBY3_DE	Rice - By-Product 3 (Rice broken) - Metabolizable energy content for animals (Giga joules)
74	DB_FEConversion	ARRBY3_ME	Rice - By-Product 3 (Rice broken) - Metabolizable energy content for humans (Giga joules)
75	DB_FEConversion	BANBY1_PR	Banana - By-Product 1 (Banana fruits) - Protein content (tonnes)
76	DB_FEConversion	BANBY2_PR	Banana - By-Product 2 (Banana peels and bunch residues) - Protein content (tonnes)
77	DB_FEConversion	BANHR1_PR	Banana - Field Residue 1 (Banana aerial parts) - Protein content (tonnes)
78	DB_FEConversion	BANBY1_GE	Banana - By-Product 1 (Banana fruits) - Gross energy content (Giga joules)
79	DB_FEConversion	BANBY2_GE	Banana - By-Product 2 (Banana peels and bunch residues) - Gross energy content (Giga joules)
80	DB_FEConversion	BANHR1_GE	Banana - Field Residue 1 (Banana aerial parts) - Gross energy content (Giga joules)
81	DB_FEConversion	BANBY1_ME	Banana - By-Product 1 (Banana fruits) - Metabolizable energy content for humans (Giga joules)
82	DB_FEConversion	CACPRI_PR	Cocoa - (Cocoa beans) - Protein content (tonnes)
83	DB_FEConversion	CACHR1_PR	Cocoa - By-Product 1 (Cocoa pod husks) - Protein content (tonnes)
84	DB_FEConversion	CACPRI_GE	Cocoa - (Cocoa beans) - Gross energy content (Giga joules)
85	DB_FEConversion	CACHR1_GE	Cocoa - By-Product 1 (Cocoa pod husks) - Gross energy content (Giga joules)
86	DB_FEConversion	CACPRI_ME	Cocoa - (Cocoa beans) - Metabolizable energy content for humans (Giga joules)
87	DB_FEConversion	CAFPRI_PR	Coffee - (Coffee bean (roasted, ground)) - Protein content (tonnes)
88	DB_FEConversion	CAFPRI_GE	Coffee - (Coffee bean (roasted, ground)) - Gross energy content (Giga joules)
89	DB_FEConversion	CAFPRI_ME	Coffee - (Coffee bean (roasted, ground)) - Metabolizable energy content for humans (Giga joules)
90	DB_FEConversion	CANBY1_PR	Sugarcane - By-Product 1 (Sugarcane tops and leaves) - Protein content (tonnes)
91	DB_FEConversion	CANBY2_PR	Sugarcane - By-Product 2 (Sugarcane stems) - Protein content (tonnes)
92	DB_FEConversion	CANBY3_PR	Sugarcane - By-Product 3 (Cane bagasse) - Protein content (tonnes)
93	DB_FEConversion	CANBY4_PR	Sugarcane - By-Product 4 (Cane molasses) - Protein content (tonnes)
94	DB_FEConversion	CANBY5_PR	Sugarcane - By-Product 5 (Cane filter cake) - Protein content (tonnes)
95	DB_FEConversion	CANBY6_PR	Sugarcane - By-Product 6 (Brown sugar ) - Protein content (tonnes)
96	DB_FEConversion	CANBY8_PR	Sugarcane - By-Product 8 (Cane vinasse) - Protein content (tonnes)
97	DB_FEConversion	CANHR1_PR	Sugarcane - Field Residue 1 (Sugarcane straw) - Protein content (tonnes)
98	DB_FEConversion	CANBY1_GE	Sugarcane - By-Product 1 (Sugarcane tops and leaves) - Gross energy content (Giga joules)
99	DB_FEConversion	CANBY2_GE	Sugarcane - By-Product 2 (Sugarcane stems) - Gross energy content (Giga joules)
100	DB_FEConversion	CANBY3_GE	Sugarcane - By-Product 3 (Cane bagasse) - Gross energy content (Giga joules)
101	DB_FEConversion	CANBY4_GE	Sugarcane - By-Product 4 (Cane molasses) - Gross energy content (Giga joules)
102	DB_FEConversion	CANBY5_GE	Sugarcane - By-Product 5 (Cane filter cake) - Gross energy content (Giga joules)
103	DB_FEConversion	CANBY6_GE	Sugarcane - By-Product 6 (Brown sugar ) - Gross energy content (Giga joules)
104	DB_FEConversion	CANBY8_GE	Sugarcane - By-Product 8 (Cane vinasse) - Gross energy content (Giga joules)
105	DB_FEConversion	CANHR1_GE	Sugarcane - Field Residue 1 (Sugarcane straw) - Gross energy content (Giga joules)
106	DB_FEConversion	CANBY6_ME	Sugarcane - By-Product 6 (Brown sugar ) - Metabolizable energy content for humans (Giga joules)
107	DB_FEConversion	FEIPRI_PR	Common beans - (Common bean grains) - Protein content (tonnes)
108	DB_FEConversion	FEIHR1_PR	Common beans - Field Residue 1 (Tops and leaves) - Protein content (tonnes)
109	DB_FEConversion	FEIPRI_GE	Common beans - (Common bean grains) - Gross energy content (Giga joules)
110	DB_FEConversion	FEIHR1_GE	Common beans - Field Residue 1 (Tops and leaves) - Gross energy content (Giga joules)
111	DB_FEConversion	FEIPRI_ME	Common beans - (Common bean grains) - Metabolizable energy content for humans (Giga joules)
112	DB_FEConversion	LARPRI_PR	Orange - (Orange Fruits) - Protein content (tonnes)
113	DB_FEConversion	LARBY1_PR	Orange - By-Product 1 (Orange fruits in natura) - Protein content (tonnes)
114	DB_FEConversion	LARBY2_PR	Orange - By-Product 2 (Citrus pulp, fresh) - Protein content (tonnes)
115	DB_FEConversion	LARBY3_PR	Orange - By-Product 3 (Citrus juice, concentraded) - Protein content (tonnes)
116	DB_FEConversion	LARPRI_GE	Orange - (Orange Fruits) - Gross energy content (Giga joules)
117	DB_FEConversion	LARBY1_GE	Orange - By-Product 1 (Orange fruits in natura) - Gross energy content (Giga joules)
118	DB_FEConversion	LARBY2_GE	Orange - By-Product 2 (Citrus pulp, fresh) - Gross energy content (Giga joules)
119	DB_FEConversion	LARBY3_GE	Orange - By-Product 3 (Citrus juice, concentraded) - Gross energy content (Giga joules)
120	DB_FEConversion	LARPRI_ME	Orange - (Orange Fruits) - Metabolizable energy content for humans (Giga joules)
121	DB_FEConversion	LARBY1_ME	Orange - By-Product 1 (Orange fruits in natura) - Metabolizable energy content for humans (Giga joules)
122	DB_FEConversion	LARBY2_DE	Orange - By-Product 2 (Citrus pulp, fresh) - Metabolizable energy content for animals (Giga joules)
123	DB_FEConversion	LARBY3_ME	Orange - By-Product 3 (Citrus juice, concentraded) - Metabolizable energy content for humans (Giga joules)
124	DB_FEConversion	MANPRI_PR	Cassava - (Cassava Tuber) - Protein content (tonnes)
125	DB_FEConversion	MANHR1_PR	Cassava - Field Residue 1 (Cassava Tuber) - Protein content (tonnes)
126	DB_FEConversion	MANPRI_GE	Cassava - (Cassava Tuber) - Gross energy content (Giga joules)
127	DB_FEConversion	MANHR1_GE	Cassava - Field Residue 1 (Cassava Tuber) - Gross energy content (Giga joules)
128	DB_FEConversion	MANPRI_ME	Cassava - (Cassava Tuber) - Metabolizable energy content for humans (Giga joules)
129	DB_FEConversion	MILPRI_PR	Maize - (Maize grains) - Protein content (tonnes)
130	DB_FEConversion	MILBY1_PR	Maize - By-Product 1 - (Maize grains for humans) - Protein content (tonnes)
131	DB_FEConversion	MILBY2_PR	Maize - By-Product 2 - (Maize grains for animals) - Protein content (tonnes)
132	DB_FEConversion	MILHR1_PR	Maize - Field Residue - (Maize stover) - Protein content (tonnes)
133	DB_FEConversion	MILPRI_GE	Maize - (Maize grains) - Gross energy content (Giga joules)
134	DB_FEConversion	MILBY1_GE	Maize - By-Product 1 - (Maize grains for humans) - Gross energy content (Giga joules)
135	DB_FEConversion	MILBY2_GE	Maize - By-Product 2 - (Maize grains for animals) - Gross energy content (Giga joules)
136	DB_FEConversion	MILHR1_GE	Maize - Field Residue - (Maize stover) - Gross energy content (Giga joules)
137	DB_FEConversion	MILPRI_ME	Maize - (Maize grains) - Metabolizable energy content for humans (Giga joules)
138	DB_FEConversion	MILBY1_ME	Maize - By-Product 1 - (Maize grains for humans) - Metabolizable energy content for humans (Giga joules)
139	DB_FEConversion	MILBY2_DE	Maize - By-Product 2 - (Maize grains for animals) - Metabolizable energy content for animals (Giga joules)
140	DB_FEConversion	MILBY2_ME	Maize - By-Product 2 - (Maize grains for animals) - Metabolizable energy content for humans (Giga joules)
141	DB_FEConversion	SOJPRI_PR	Soybean - (Soybean seeds) - Protein content (tonnes)
142	DB_FEConversion	SOJBY1_PR	Soybean - By-Product 1 - (Soybean seeds for humans) - Protein content (tonnes)
143	DB_FEConversion	SOJBY2_PR	Soybean - By-Product 2 - (Soybean seeds oil) - Protein content (tonnes)
144	DB_FEConversion	SOJBY3_PR	Soybean - By-Product 3 - (Soybean seeds meal) - Protein content (tonnes)
145	DB_FEConversion	SOJHR1_PR	Soybean - Field Residue 1 - (Soybean stalks & husks) - Protein content (tonnes)
146	DB_FEConversion	SOJPRI_GE	Soybean - (Soybean seeds) - Gross energy content (Giga joules)
147	DB_FEConversion	SOJBY1_GE	Soybean - By-Product 1 - (Soybean seeds for humans) - Gross energy content (Giga joules)
148	DB_FEConversion	SOJBY2_GE	Soybean - By-Product 2 - (Soybean seeds oil) - Gross energy content (Giga joules)
149	DB_FEConversion	SOJBY3_GE	Soybean - By-Product 3 - (Soybean seeds meal) - Gross energy content (Giga joules)
150	DB_FEConversion	SOJHR1_GE	Soybean - Field Residue 1 - (Soybean stalks & husks) - Gross energy content (Giga joules)
151	DB_FEConversion	SOJPRI_ME	Soybean - (Soybean seeds) - Metabolizable energy content for humans (Giga joules)
152	DB_FEConversion	SOJBY1_ME	Soybean - By-Product 1 - (Soybean seeds for humans) - Metabolizable energy content for humans (Giga joules)
153	DB_FEConversion	SOJBY2_ME	Soybean - By-Product 2 - (Soybean seeds oil) - Metabolizable energy content for humans (Giga joules)
154	DB_FEConversion	SOJBY3_DE	Soybean - By-Product 3 - (Soybean seeds meal) - Metabolizable energy content for animals (Giga joules)
155	DB_FEConversion	SOJBY3_ME	Soybean - Field Residue 1 - (Soybean stalks & husks) - Metabolizable energy content for humans (Giga joules)
156	DB_FEConversion	TRIPRI_PR	Wheat - (Wheat grain) - Protein content (tonnes)
157	DB_FEConversion	TRIBY1_PR	Wheat - By-Product 1 - (Wheat flour) - Protein content (tonnes)
158	DB_FEConversion	TRIBY2_PR	Wheat - By-Product 2 - (Wheat bran) - Protein content (tonnes)
159	DB_FEConversion	TRIHR1_PR	Wheat - Field Residue 1 - (Wheat straw) - Protein content (tonnes)
160	DB_FEConversion	TRIPRI_GE	Wheat - (Wheat grain) - Gross energy content (Giga joules)
161	DB_FEConversion	TRIBY1_GE	Wheat - By-Product 1 - (Wheat flour) - Gross energy content (Giga joules)
162	DB_FEConversion	TRIBY2_GE	Wheat - By-Product 2 - (Wheat bran) - Gross energy content (Giga joules)
163	DB_FEConversion	TRIHR1_GE	Wheat - Field Residue 1 - (Wheat straw) - Gross energy content (Giga joules)
164	DB_FEConversion	TRIPRI_ME	Wheat - (Wheat grain) - Metabolizable energy content for humans (Giga joules)
165	DB_FEConversion	TRIBY1_ME	Wheat - By-Product 1 - (Wheat flour) - Metabolizable energy content for humans (Giga joules)
166	DB_FEConversion	TRIBY2_DE	Wheat - By-Product 2 - (Wheat bran) - Metabolizable energy content for animals (Giga joules)
167	DB_FEConversion	TRIBY2_ME	Wheat - By-Product 2 - (Wheat bran) - Metabolizable energy content for humans (Giga joules)
168	DB_FEConversion	CARCAT_PR	Animal Carcass - (Bull/Cattle carcass) - Protein content (tonnes)
169	DB_FEConversion	CARGSH_PR	Animal Carcass - (Goats and sheep carcass) - Protein content (tonnes)
170	DB_FEConversion	CARHOR_PR	Animal Carcass - (Horses, donkeys and mule carcass) - Protein content (tonnes)
171	DB_FEConversion	CARPIG_PR	Animal Carcass - (Pigs) - Protein content (tonnes)
172	DB_FEConversion	CARCPOU_PR	Animal Carcass - (Poultries) - Protein content (tonnes)
173	DB_FEConversion	CARCAT_GE	Animal Carcass - (Bull/Cattle carcass) - Gross energy content (Giga joules)
174	DB_FEConversion	CARGSH_GE	Animal Carcass - (Goats and sheep carcass) - Gross energy content (Giga joules)
175	DB_FEConversion	CARHOR_GE	Animal Carcass - (Horses, donkeys and mule carcass) - Gross energy content (Giga joules)
176	DB_FEConversion	CARPIG_GE	Animal Carcass - (Pigs) - Gross energy content (Giga joules)
177	DB_FEConversion	CARCPOU_GE	Animal Carcass - (Poultries) - Gross energy content (Giga joules)
178	DB_FEConversion	CARCAT_ME	Animal Carcass - (Bull/Cattle carcass) - Metabolizable energy content for humans (Giga joules)
179	DB_FEConversion	CARGSH_ME	Animal Carcass - (Goats and sheep carcass) - Metabolizable energy content for humans (Giga joules)
180	DB_FEConversion	CARHOR_ME	Animal Carcass - (Horses, donkeys and mule carcass) - Metabolizable energy content for humans (Giga joules)
181	DB_FEConversion	CARPIG_ME	Animal Carcass - (Pigs) - Metabolizable energy content for humans (Giga joules)
182	DB_FEConversion	CARCPOU_ME	Animal Carcass - (Poultries) - Metabolizable energy content for humans (Giga joules)
183	DB_FEConversion	MILCAT_PR	Milk from cattle - Protein content (tonnes)
184	DB_FEConversion	MILGSH_PR	Milk from goats - Protein content (tonnes)
185	DB_FEConversion	EGGCHI_PR	Chicken eggs - Protein content (tonnes)
186	DB_FEConversion	MILCAT_GE	Milk from cattle - Gross energy content (Giga joules)
187	DB_FEConversion	MILGSH_GE	Milk from goats - Gross energy content (Giga joules)
188	DB_FEConversion	EGGCHI_GE	Chicken eggs - Gross energy content (Giga joules)
189	DB_FEConversion	MILCAT_ME	Milk from cattle - Metabolizable energy content for humans (Giga joules)
190	DB_FEConversion	MILGSH_ME	Milk from goats - Metabolizable energy content for humans (Giga joules)
191	DB_FEConversion	EGGCHI_ME	Chicken eggs - Metabolizable energy content for humans (Giga joules)
192	DB_ProductionFE or DB_ProductionFE_fromUtility	ALGPRTOT	Cotton - Production - Total Protein Content (tonnes)
193	DB_ProductionFE or DB_ProductionFE_fromUtility	ALGGETOT	Cotton - Production - Total Gross Energy Content (Giga joules)
194	DB_ProductionFE or DB_ProductionFE_fromUtility	ALGMETOT	Cotton - Production - Total Metabolizable energy content for humans (Giga joules)
195	DB_ProductionFE or DB_ProductionFE_fromUtility	ARRPRTOT	Rice - Production - Total Protein Content (tonnes)
196	DB_ProductionFE or DB_ProductionFE_fromUtility	ARRGETOT	Rice - Production - Total Gross Energy Content (Giga joules)
197	DB_ProductionFE or DB_ProductionFE_fromUtility	ARRMETOT	Rice - Production - Total Metabolizable energy content for humans (Giga joules)
198	DB_ProductionFE or DB_ProductionFE_fromUtility	BANPRTOT	Banana - Production - Total Protein Content (tonnes)
199	DB_ProductionFE or DB_ProductionFE_fromUtility	BANGETOT	Banana - Production - Total Gross Energy Content (Giga joules)
200	DB_ProductionFE or DB_ProductionFE_fromUtility	BANMETOT	Banana - Production - Total Metabolizable energy content for humans (Giga joules)
201	DB_ProductionFE or DB_ProductionFE_fromUtility	CACPRTOT	Cocoa - Production - Total Protein Content (tonnes)
202	DB_ProductionFE or DB_ProductionFE_fromUtility	CACGETOT	Cocoa - Production - Total Gross Energy Content (Giga joules)
203	DB_ProductionFE or DB_ProductionFE_fromUtility	CACMETOT	Cocoa - Production - Total Metabolizable energy content for humans (Giga joules)
204	DB_ProductionFE or DB_ProductionFE_fromUtility	CAFPRTOT	Coffee - Production - Total Protein Content (tonnes)
205	DB_ProductionFE or DB_ProductionFE_fromUtility	CAFGETOT	Coffee - Production - Total Gross Energy Content (Giga joules)
206	DB_ProductionFE or DB_ProductionFE_fromUtility	CAFMETOT	Coffee - Production - Total Metabolizable energy content for humans (Giga joules)
207	DB_ProductionFE or DB_ProductionFE_fromUtility	CANPRTOT	Sugarcane - Production - Total Protein Content (tonnes)
208	DB_ProductionFE or DB_ProductionFE_fromUtility	CANGETOT	Sugarcane - Production - Total Gross Energy Content (Giga joules)
209	DB_ProductionFE or DB_ProductionFE_fromUtility	CANMETOT	Sugarcane - Production - Total Metabolizable energy content for humans (Giga joules)
210	DB_ProductionFE or DB_ProductionFE_fromUtility	FEIPRTOT	Common beans - Production - Total Protein Content (tonnes)
211	DB_ProductionFE or DB_ProductionFE_fromUtility	FEIGETOT	Common beans - Production - Total Gross Energy Content (Giga joules)
212	DB_ProductionFE or DB_ProductionFE_fromUtility	FEIMETOT	Common beans - Production - Total Metabolizable energy content for humans (Giga joules)
213	DB_ProductionFE or DB_ProductionFE_fromUtility	LARPRTOT	Orange - Production - Total Protein Content (tonnes)
214	DB_ProductionFE or DB_ProductionFE_fromUtility	LARGETOT	Orange - Production - Total Gross Energy Content (Giga joules)
215	DB_ProductionFE or DB_ProductionFE_fromUtility	LARMETOT	Orange - Production - Total Metabolizable energy content for humans (Giga joules)
216	DB_ProductionFE or DB_ProductionFE_fromUtility	MANPRTOT	Cassava - Production - Total Protein Content (tonnes)
217	DB_ProductionFE or DB_ProductionFE_fromUtility	MANGETOT	Cassava - Production - Total Gross Energy Content (Giga joules)
218	DB_ProductionFE or DB_ProductionFE_fromUtility	MANMETOT	Cassava - Production - Total Metabolizable energy content for humans (Giga joules)
219	DB_ProductionFE or DB_ProductionFE_fromUtility	MILPRTOT	Corn - Production - Total Protein Content (tonnes)
220	DB_ProductionFE or DB_ProductionFE_fromUtility	MILGETOT	Corn - Production - Total Gross Energy Content (Giga joules)
221	DB_ProductionFE or DB_ProductionFE_fromUtility	MILMETOT	Corn - Production - Total Metabolizable energy content for humans (Giga joules)
222	DB_ProductionFE or DB_ProductionFE_fromUtility	SOJPRTOT	Soybean - Production - Total Protein Content (tonnes)
223	DB_ProductionFE or DB_ProductionFE_fromUtility	SOJGETOT	Soybean - Production - Total Gross Energy Content (Giga joules)
224	DB_ProductionFE or DB_ProductionFE_fromUtility	SOJMETOT	Soybean - Production - Total Metabolizable energy content for humans (Giga joules)
225	DB_ProductionFE or DB_ProductionFE_fromUtility	TRIPRTOT	Wheat - Production - Total Protein Content (tonnes)
226	DB_ProductionFE or DB_ProductionFE_fromUtility	TRIGETOT	Wheat - Production - Total Gross Energy Content (Giga joules)
227	DB_ProductionFE or DB_ProductionFE_fromUtility	TRIMETOT	Wheat - Production - Total Metabolizable energy content for humans (Giga joules)
228	DB_ProductionFE or DB_ProductionFE_fromUtility	CROPPPRTOT	All Crops - Production - Total Protein Content (tonnes)
229	DB_ProductionFE or DB_ProductionFE_fromUtility	CROPPGETOT	All Crops - Production - Total Gross Energy Content (Giga joules)
230	DB_ProductionFE or DB_ProductionFE_fromUtility	CROPPMETOT	All Crops - Production - Total Metabolizable energy content for humans (Giga joules)
231	DB_UtilityFE	ALGPRHUM	Cotton - Utility - Total Protein Content for human consumption (tonnes)
232	DB_UtilityFE	ALGPRANI	Cotton - Utility - Total Protein Content for animal consumption (tonnes)
233	DB_UtilityFE	ALGPRRES	Cotton - Utility - Total Protein Content in field residues (tonnes)
234	DB_UtilityFE	ALGGEHUM	Cotton - Utility - Total Gross Energy Content for human consumption (Giga joules)
235	DB_UtilityFE	ALGGEANI	Cotton - Utility - Total Gross Energy Content for animal consumption (Giga joules)
236	DB_UtilityFE	ALGGERES	Cotton - Utility - Total Gross Energy Content in field residues (Giga joules)
237	DB_UtilityFE	ALGMEHUM	Cotton - Utility - Total Metabolizable Energy Content for human consumption (Giga joules)
238	DB_UtilityFE	ALGMEANI	Cotton - Utility - Total Metabolizable Energy Content for animal consumption (Giga joules)
239	DB_UtilityFE	ARRPRHUM	Rice - Utility - Total Protein Content for human consumption (tonnes)
240	DB_UtilityFE	ARRPRANI	Rice - Utility - Total Protein Content for animal consumption (tonnes)
241	DB_UtilityFE	ARRPRRES	Rice - Utility - Total Protein Content in field residues (tonnes)
242	DB_UtilityFE	ARRGEHUM	Rice - Utility - Total Gross Energy Content for human consumption (Giga joules)
243	DB_UtilityFE	ARRGEANI	Rice - Utility - Total Gross Energy Content for animal consumption (Giga joules)
244	DB_UtilityFE	ARRGERES	Rice - Utility - Total Gross Energy Content in field residues (Giga joules)
245	DB_UtilityFE	ARRMEHUM	Rice - Utility - Total Metabolizable Energy Content for human consumption (Giga joules)
246	DB_UtilityFE	ARRMEANI	Rice - Utility - Total Metabolizable Energy Content for animal consumption (Giga joules)
247	DB_UtilityFE	BANPRHUM	Banana - Utility - Total Protein Content for human consumption (tonnes)
248	DB_UtilityFE	BANPRRES	Banana - Utility - Total Protein Content in field residues (tonnes)
249	DB_UtilityFE	BANGEHUM	Banana - Utility - Total Gross Energy Content for human consumption (Giga joules)
250	DB_UtilityFE	BANGERES	Banana - Utility - Total Gross Energy Content in field residues (Giga joules)
251	DB_UtilityFE	BANMEHUM	Banana - Utility - Total Metabolizable Energy Content for human consumption (Giga joules)
252	DB_UtilityFE	CACPRHUM	Cocoa - Utility - Total Protein Content for human consumption (tonnes)
253	DB_UtilityFE	CACPRRES	Cocoa - Utility - Total Protein Content in field residues (tonnes)
254	DB_UtilityFE	CACGEHUM	Cocoa - Utility - Total Gross Energy Content for human consumption (Giga joules)
255	DB_UtilityFE	CACGERES	Cocoa - Utility - Total Gross Energy Content in field residues (Giga joules)
256	DB_UtilityFE	CACMEHUM	Cocoa - Utility - Total Metabolizable Energy Content for human consumption (Giga joules)
257	DB_UtilityFE	CAFPRHUM	Coffee - Utility - Total Protein Content for human consumption (tonnes)
258	DB_UtilityFE	CAFGEHUM	Coffee - Utility - Total Gross Energy Content for human consumption (Giga joules)
259	DB_UtilityFE	CAFMEHUM	Coffee - Utility - Total Metabolizable Energy Content for human consumption (Giga joules)
260	DB_UtilityFE	CANPRHUM	Sugarcane - Utility - Total Protein Content for human consumption (tonnes)
261	DB_UtilityFE	CANPRRES	Sugarcane - Utility - Total Protein Content in field residues (tonnes)
262	DB_UtilityFE	CANGEHUM	Sugarcane - Utility - Total Gross Energy Content for human consumption (Giga joules)
263	DB_UtilityFE	CANGERES	Sugarcane - Utility - Total Gross Energy Content in field residues (Giga joules)
264	DB_UtilityFE	CANMEHUM	Sugarcane - Utility - Total Metabolizable Energy Content for human consumption (Giga joules)
265	DB_UtilityFE	FEIPRHUM	Common beans - Utility - Total Protein Content for human consumption (tonnes)
266	DB_UtilityFE	FEIPRRES	Common beans - Utility - Total Protein Content in field residues (tonnes)
267	DB_UtilityFE	FEIGEHUM	Common beans - Utility - Total Gross Energy Content for human consumption (Giga joules)
268	DB_UtilityFE	FEIGERES	Common beans - Utility - Total Gross Energy Content in field residues (Giga joules)
269	DB_UtilityFE	FEIMEHUM	Common beans - Utility - Total Metabolizable Energy Content for human consumption (Giga joules)
270	DB_UtilityFE	LARPRHUM	Orange - Utility - Total Protein Content for human consumption (tonnes)
271	DB_UtilityFE	LARPRANI	Orange - Utility - Total Gross Energy Content for animal consumption (Giga joules)
272	DB_UtilityFE	LARGEHUM	Orange - Utility - Total Gross Energy Content for human consumption (Giga joules)
273	DB_UtilityFE	LARGEANI	Orange - Utility - Total Gross Energy Content for animal consumption (Giga joules)
274	DB_UtilityFE	LARMEHUM	Orange - Utility - Total Metabolizable Energy Content for human consumption (Giga joules)
275	DB_UtilityFE	LARMEANI	Orange - Utility - Total Metabolizable Energy Content for animal consumption (Giga joules)
276	DB_UtilityFE	MANPRHUM	Cassava - Utility - Total Protein Content for human consumption (tonnes)
277	DB_UtilityFE	MANPRRES	Cassava - Utility - Total Protein Content in field residues (tonnes)
278	DB_UtilityFE	MANGEHUM	Casava - Utility - Total Gross Energy Content for human consumption (Giga joules)
279	DB_UtilityFE	MANGERES	Casava - Utility - Total Gross Energy Content in field residues (Giga joules)
280	DB_UtilityFE	MANMEHUM	Casava - Utility - Total Metabolizable Energy Content for human consumption (Giga joules)
281	DB_UtilityFE	MILPRHUM	Maize - Utility - Total Protein Content for human consumption (tonnes)
282	DB_UtilityFE	MILPRANI	Maize - Utility - Total Gross Energy Content for animal consumption (Giga joules)
283	DB_UtilityFE	MILPRRES	Maize - Utility - Total Protein Content in field residues (tonnes)
284	DB_UtilityFE	MILGEHUM	Maize - Utility - Total Gross Energy Content for human consumption (Giga joules)
285	DB_UtilityFE	MILGEANI	Maize - Utility - Total Gross Energy Content for animal consumption (Giga joules)
286	DB_UtilityFE	MILGERES	Maize - Utility - Total Gross Energy Content in field residues (Giga joules)
287	DB_UtilityFE	MILMEHUM	Maize - Utility - Total Metabolizable Energy Content for human consumption (Giga joules)
288	DB_UtilityFE	MILMEANI	Maize - Utility - Total Metabolizable Energy Content for animal consumption (Giga joules)
289	DB_UtilityFE	SOJPRHUM	Soy - Utility - Total Protein Content for human consumption (tonnes)
290	DB_UtilityFE	SOJPRANI	Soy - Utility - Total Gross Energy Content for animal consumption (Giga joules)
291	DB_UtilityFE	SOJPRRES	Soy - Utility - Total Protein Content in field residues (tonnes)
292	DB_UtilityFE	SOJGEHUM	Soy - Utility - Total Gross Energy Content for human consumption (Giga joules)
293	DB_UtilityFE	SOJGEANI	Soy - Utility - Total Gross Energy Content for animal consumption (Giga joules)
294	DB_UtilityFE	SOJGERES	Soy - Utility - Total Gross Energy Content in field residues (Giga joules)
295	DB_UtilityFE	SOJMEHUM	Soy - Utility - Total Metabolizable Energy Content for human consumption (Giga joules)
296	DB_UtilityFE	SOJMEANI	Soy - Utility - Total Metabolizable Energy Content for animal consumption (Giga joules)
297	DB_UtilityFE	TRIPRHUM	Wheat - Utility - Total Protein Content for human consumption (tonnes)
298	DB_UtilityFE	TRIPRANI	Wheat - Utility - Total Gross Energy Content for animal consumption (Giga joules)
299	DB_UtilityFE	TRIPRRES	Wheat - Utility - Total Protein Content in field residues (tonnes)
300	DB_UtilityFE	TRIGEHUM	Wheat - Utility - Total Gross Energy Content for human consumption (Giga joules)
301	DB_UtilityFE	TRIGEANI	Wheat - Utility - Total Gross Energy Content for animal consumption (Giga joules)
302	DB_UtilityFE	TRIGERES	Wheat - Utility - Total Gross Energy Content in field residues (Giga joules)
303	DB_UtilityFE	TRIMEHUM	Wheat - Utility - Total Metabolizable Energy Content for human consumption (Giga joules)
304	DB_UtilityFE	TRIMEANI	Wheat - Utility - Total Metabolizable Energy Content for animal consumption (Giga joules)
305	DB_UtilityFE	CROPUPRHUM	All Crops - Utility - Total Protein Content for human consumption (tonnes)
306	DB_UtilityFE	CROPUPRANI	All Crops - Utility - Total Protein Content for animal consumption (tonnes)
307	DB_UtilityFE	CROPUPRRES	All Crops - Utility - Total Protein Content in field residues (tonnes)
308	DB_UtilityFE	CROPUGEHUM	All Crops - Utility - Total Gross Energy Content for human consumption (Giga joules)
309	DB_UtilityFE	CROPUGEANI	All Crops - Utility - Total Gross Energy Content for animal consumption (Giga joules)
310	DB_UtilityFE	CROPUGERES	All Crops - Utility - Total Gross Energy Content in field residues (Giga joules)
311	DB_UtilityFE	CROPUMEHUM	All Crops - Utility - Total Metabolizable Energy Content for human consumption (Giga joules)
312	DB_UtilityFE	CROPUMEANI	All Crops - Utility - Total Metabolizable Energy Content for animal consumption (Giga joules)
313	DB_UtilityFE	CARPRTOT	Animal Carcass - Utility - Total Protein Content for human consumption (tonnes)
314	DB_UtilityFE	CARGETOT	Animal Carcass - Utility - Total Gross Energy Content for human consumption (Giga joules)
315	DB_UtilityFE	CARMETOT	Animal Carcass - Utility - Total Metabolizable Energy Content for human consumption (Giga joules)
316	DB_UtilityFE	MIEPRTOT	Milk and Eggs - Utility - Total Protein Content for human consumption (tonnes)
317	DB_UtilityFE	MIEGETOT	Milk and Eggs - Utility - Total Gross Energy Content for human consumption (Giga joules)
318	DB_UtilityFE	MIEMETOT	Milk and Eggs - Utility - Total Metabolizable Energy Content for human consumption (Giga joules)
319	DB_UtilityFE	LIVPRHUM	Livestock - Utility - Total Protein Content for human consumption (tonnes)
320	DB_UtilityFE	LIVGEHUM	Livestock - Utility - Total Gross Energy Content for human consumption (Giga joules)
321	DB_UtilityFE	LIVMEHUM	Livestock - Utility - Total Metabolizable Energy Content for human consumption (Giga joules)
322	DB_UtilityFE	LIVCROPRT	Livestock&Crop - Utility - Total Protein Content (tonnes)
323	DB_UtilityFE	LIVCROGET	Livestock&Crop - Utility - Total Gross Energy Content (Giga joules)
324	DB_UtilityFE	LIVCROMET	Livestock&Crop - Utility - Total Metabolizable Energy Content (Giga joules)
325	DB_UtilityFE	LIVCROPRR	Livestock&Crop - Utility - Relation Protein Content (tonnes)
326	DB_UtilityFE	LIVCROGER	Livestock&Crop - Utility - Relation Gross Energy Content (Giga joules)
327	DB_UtilityFE	LIVCROMER	Livestock&Crop - Utility - Relation Metabolizable Energy Content (Giga joules)
328	Results_Crop&Beef	CROPHPRHUM	Crop - Utility - Hypothetical Potential - Protein Content for human consumption (tonnes)
329	Results_Crop&Beef	CROPHGEHUM	Crop - Utility - Hypothetical Potential - Gross Energy Content for human consumption (Giga joules)
330	Results_Crop&Beef	CROPHMEHUM	Crop - Utility - Hypothetical Potential - Metabolizable Energy Content for human consumption (Giga joules)
331	Results_Crop&Beef	CROPHPRHA	Crop - Utility - Hypothetical Potential - Protein Content for animal consumption (tonnes)
332	Results_Crop&Beef	CROPHGEHA	Crop - Utility - Hypothetical Potential - Gross Energy Content for animal consumption (Giga joules)
333	Results_Crop&Beef	CROPHMEHA	Crop - Utility - Hypothetical Potential - Metabolizable Energy Content for animal consumption (Giga joules)
334	Results_Crop&Beef	BEEFPRTOT	Beef - Utility - Total Protein Content for human consumption (Giga joules)
335	Results_Crop&Beef	BEEFGETOT	Beef - Utility - Total Gross Energy Content for human consumption (Giga joules)
336	Results_Crop&Beef	BEEFMETOT	Beef - Utility - Total Metabolizable Energy Content for human consumption (Giga joules)
337	Results_Crop&Beef	BEEFPRHA	Beef - Utility - Total Protein Content for animal consumption (Giga joules)
338	Results_Crop&Beef	BEEFGEHA	Beef - Utility - Total Gross Energy Content for animals consumption (Giga joules)
339	Results_Crop&Beef	BEEFMEHA	Beef - Utility - Total Metabolizable Energy Content for animals consumption (Giga joules)
340	Results_Crop&Beef	BEECROPRR	Beef and Crop relation of protein production (Beef / Crop)
341	Results_Crop&Beef	BEECROGER	Beef and Crop relation of gross energy production (Beef / Crop)
342	Results_Crop&Beef	BEECROMER	Beef and Crop relation of metabolizable energy production (Beef / Crop)
343	Results_Crop&Pasture	CROPUPRHUM	All Crops - Utility - Total Protein Content for human consumption (tonnes)
344	Results_Crop&Pasture	CROPUGEHUM	All Crops - Utility - Total Gross Energy Content for human consumption (Giga joules)
345	Results_Crop&Pasture	CROPUMEHUM	All Crops - Utility - Total Metabolizable Energy Content for human consumption (Giga joules)
346	Results_Crop&Pasture	CARWHIPR	White meat carcass production - Protein Content (tonnes)
347	Results_Crop&Pasture	CARWHIGE	White meat carcass production - Gross energy content (Giga joules)
348	Results_Crop&Pasture	CARWHIME	White meat carcass production - Metabolizable energy content (Giga joules)
349	Results_Crop&Pasture	EGGCHIPR	Chicken egg production - Protein Content (tonnes)
350	Results_Crop&Pasture	EGGCHIGE	Chicken egg production - Gross energy content (Giga joules)
351	Results_Crop&Pasture	EGGCHIME	Chicken egg production - Metabolizable energy content (Giga joules)
352	Results_Crop&Pasture	MILKFEEDPR	Milk from feed production - Protein Content (tonnes)
353	Results_Crop&Pasture	MILKFEEDGE	Milk from feed production - Gross energy content (Giga joules)
354	Results_Crop&Pasture	MILKFEEDME	Milk from feed production - Metabolizable energy content (Giga joules)
355	Results_Crop&Pasture	FOODCROPPR	Food From Agricultural Crops - Protein Content (tonnes)
356	Results_Crop&Pasture	FOODCROPGE	Food From Agricultural Crops - Gross Energy Content (Giga joules)
357	Results_Crop&Pasture	FOODCROPME	Food From Agricultural Crops - Metabolizable Energy (Giga joules)
358	Results_Crop&Pasture	CARREDPR	Red meat carcass production - Protein Content (tonnes)
359	Results_Crop&Pasture	CARREDGE	Red meat carcass production - Gross energy content (Giga joules)
360	Results_Crop&Pasture	CARREDME	Red meat carcass production - Metabolizable energy content (Giga joules)
361	Results_Crop&Pasture	MILKPASTPR	Milk from pasture production - Protein Content (tonnes)
362	Results_Crop&Pasture	MILKPASTGE	Milk from pasture production - Gross energy content (Giga joules)
363	Results_Crop&Pasture	MILKPASTME	Milk from pasture production - Metabolizable energy content (Giga joules)
364	Results_Crop&Pasture	FOODPASTPR	Food from Pastures - Protein Content (tonnes)
365	Results_Crop&Pasture	FOODPASTGE	Food from Pastures - Gross Energy Content (Giga joules)
366	Results_Crop&Pasture	FOODPASTME	Food from Pastures - Metabolizable Energy Content (Giga joules)
367	Results_Crop&Pasture	PASCROPRR	Pasture and Crop Relation of protein production (Pasture / Crop)
368	Results_Crop&Pasture	PASCROGER	Pasture and Crop Relation of gross energy production (Pasture / Crop)
369	Results_Crop&Pasture	PASCROMER	Pasture and Crop Relation of metabolizable energy production (Pasture / Crop)
370	Results_Feed2WhiteMeat	POUFEED	Feed products and by-products converted to pig meat (carcass weight; tonnes)
371	Results_Feed2WhiteMeat	PIGFEED	Feed products and by-products converted to poultry meat (carcass weight; tonnes)
372	Results_Feed2WhiteMeat	WMEATPT	White meat total production (carcass weight; tonnes)
373	Results_Feed2WhiteMeat	WHIMEATPR	White meat protein content (tonnes)
374	Results_Feed2WhiteMeat	WHIMEATGE	White meat gross energy content (tonnes)
375	Results_Feed2WhiteMeat	WHIMEATME	White meat metabolizable energy content (tonnes)

## Sheet: DB_Census_State
STATES AND YEARS ANALIZED				LAND USE GROUPS								STOCKING RATE PER GROUP OF ANIMAL										ANIMAL PRODUCTION (MILK & EGGS)			HARVESTED AREA OF THE 12 MOST REPRESENTATIVE AGRICULTURAL CROPS (hectares)												PRODUCTION OF THE 12 MOST REPRESENTATIVE AGRICULTURAL CROPS (tonnes)
CODST	STATE	YEAR	REGION	USOPERMAR	USOTEMPAR	USOAGRICOLA	PASTNATAR	PASTPLANAR	PASTTOTAR	USOMATANAR	USOMATAPAR	EEBOVINC	EEBUBANC	EECAPRINC	EEOVINONC	EEEQUINC	EEASININC	EEMUARENC	EFANIMATOT	EESUINOSNC	EEAVESNC	LEITEVPL	LEITECPL	OVOSPU	ALGODAOAC	ARROZAC	BANANAAC	CACAUAC	CAFEAC	CANAAC	FEIJAOAC	LARANJAAC	MANDIOCAAC	MILHOAC	SOJAAC	TRIGOAC	ALGODAOPT	ARROZPT	BANANAPT	CACAUPT	CAFEPT	CANAPT	FEIJAOPT	LARANJAPT	MANDIOCAPT	MILHOPT	SOJAPT	TRIGOPT
11	Rondônia	1975	NORTE	45763	147700	193463	60046	164524	224570	2551749	297	55392	1429	874	2068	2623	73	1757	64216	133513	1140000	3240000	4000	18780000	85	77855	3270	9	1447	94	15593	13	4152	38672	282	0	43	125589	33201	2	1029	1074	7238	598.56	39780	36119	66	0
12	Acre	1975	NORTE	3512	37675	41187	53991	70113	124104	4047566	2	120143	96	843	11243	4286	104	1648	138363	109625	873000	6900000	1000	18312000	0	10538	2770	0	88	289	4621	19	8681	15293	0	0	0	14144	18747.6	0	36	6156	4323	424	123248	18093	0	0
13	Amazonas	1975	NORTE	37644	166891	204535	120535	71850	192385	4812586	1206	203437	1420	3718	11247	3629	16	178	223645	127473	2443000	13249000	3000	75732000	0	1895	7116	1130	245	307	3291	127	69662	8210	0	0	0	3090	48868.2	560	99	7942	3179	3983.52	835881	9396	0	0
14	Roraima	1975	NORTE	9239	17859	27098	1325533	27635	1353168	291185	0	246126	0	2139	14465	27624	162	395	290911	22548	267000	4081000	0	4440000	0	4529	148	0	4	13	1700	16	1384	4995	0	0	0	3859	3967.8	0	2	121	562	604.96	10877	4251	0	0
15	Pará	1975	NORTE	136949	567078	704027	1807051	1230139	3037190	9596048	86482	1441851	66043	19865	31581	89940	2728	16314	1668322	804355	6486000	20360000	11000	99492000	126	186500	2905	10368	596	4392	22464	352	159258	144739	1	0	92	187471	94360.2	1738	341	165602	10028	7796.16	1599045	84637	0	0
16	Amapá	1975	NORTE	5910	19151	25061	341290	8733	350023	206368	0	62660	11782	825	1875	3383	20	114	80659	47768	273000	957000	0	11208000	0	1424	210	4	20	59	207	33	7374	2861	0	0	0	816	10251	2	7	741	66	594.88	57715	1163	0	0
17	Tocantins	1975	NORTE	0	0	0	0	0	0	0	0	0	0	0	0	0	0	0	0	0	0	0	0	0	0	0	5226	0	0	0	0	0	0	0	0	0	0	0	0	0	0	0	0	0	0	0	0	0
21	Maranhão	1975	NORDESTE	41857	1014098	1055955	2590618	1218217	3808835	3014254	397	1784284	13558	318744	121133	273413	179454	93234	2783820	3242043	11540000	34644000	91000	125100000	1361	614974	6260	6	169	2753	53645	684	140373	358436	68	0	526	894165	74776.2	15	82	70324	21929	30047.7	920522	147329	22	0
22	Piauí	1975	NORDESTE	156473	530065	686538	3527964	171871	3699835	2732613	116	1330686	106	1313429	792757	165652	233598	43489	3879717	1861079	4497000	29314000	511000	69984000	8563	141832	2820	0	42	7112	161943	227	38289	237462	34	0	2246	133528	23235.6	0	12	197082	44038	7304	222612	131035	5	0
23	Ceará	1975	NORDESTE	1226517	913608	2140125	3521803	80645	3602448	2564545	2768	1949230	53	656258	1075980	155099	213263	100811	4150694	1200848	8137000	169731000	1551000	234168000	108891	67871	35000	0	11603	36477	312830	336	72136	538922	81	0	37853	75877	222646	3	3892	1133012	95183	7704.96	469170	316828	12	0
24	Rio Grande do Norte	1975	NORDESTE	517539	308727	826266	1638211	29680	1667891	1343192	912	733222	8	160331	275732	36218	55743	18909	1280163	124666	1864000	69323000	530000	55236000	69292	8555	4162	0	16	15470	123496	41	23189	123916	0	0	21816	8692	15555	0	3	566475	30256	980.32	128696	48540	0	0
25	Paraíba	1975	NORDESTE	613148	527913	1141061	1865636	103614	1969250	731391	1937	1163074	367	368782	363715	58268	67109	35914	2057229	243239	3550000	111858000	1608000	76704000	66826	19068	8153	0	435	51821	199755	990	44169	242975	2	0	24607	21531	59292.6	0	216	1899217	63757	23025.9	281583	128460	1	0
26	Pernambuco	1975	NORDESTE	307278	1254069	1561347	2384880	333037	2717917	625946	10357	1508162	143	1018266	483641	97469	80768	60704	3249153	459251	10822000	184584000	2818000	417492000	34501	8552	12600	1	19488	333234	291080	1990	97511	382611	59	0	11199	11211	197656	4	8673	14163205	99302	24911.4	709544	197825	49	0
27	Alagoas	1975	NORDESTE	42500	676690	719190	444650	325219	769869	295227	39	639596	193	66708	127913	40057	9418	10440	894325	82153	2080000	62781000	374000	45504000	31392	9671	2859	0	396	272556	167410	259	22236	142004	1	0	8501	15309	54253.8	0	120	11554711	58218	3564.8	152607	52102	0	0
28	Sergipe	1975	NORDESTE	82808	156334	239142	559285	609278	1168563	201146	287	793509	18	15082	107729	48560	8858	15172	988928	56235	1580000	62882000	63000	36024000	6713	10776	1727	0	42	17866	35945	5044	22756	53863	0	0	1869	22085	10934.4	0	32	759876	10809	52862.7	224421	33002	0	0
29	Bahia	1975	NORDESTE	972047	1691534	2663581	7248614	3970528	11219142	5953012	14225	8139414	7075	2254750	2005244	467888	336030	223602	13434003	2197448	12053000	383096000	3290000	263340000	62437	27005	22285	424331	25235	34345	475408	5733	235136	562499	220	0	22817	21577	296759	289993	16653	774600	163674	84202.4	2223410	282535	83	0
31	Minas Gerais	1975	SUDESTE	655363	3325458	3980821	27784234	4147048	31931282	4048776	587929	20022834	9093	90202	112087	779459	17698	232522	21263895	3629614	32483000	2740633000	606000	1273680000	69580	725389	39669	86	352067	122691	560452	7777	50560	1518501	48359	1026	54604	563790	195748	10	292837	3735559	186643	135548	378488	1928350	47744	745
32	Espírito Santo	1975	SUDESTE	334063	319935	653998	1572779	557784	2130563	439628	98388	2104159	536	19572	11852	67462	2814	36106	2242501	522366	5095000	272036000	118000	193356000	403	43148	28842	21997	187122	13734	67127	1595	22552	150649	110	0	421	37478	153337	9472	108484	499643	22205	22255.5	185050	152071	125	0
33	Rio de Janeiro	1975	SUDESTE	166081	451464	617545	1580487	278551	1859038	488327	34213	1658534	1408	14190	13139	55141	543	22041	1764996	260038	12249000	362816000	104000	408492000	280	47682	49623	1	7383	167847	19362	26812	14144	66047	42	1	141	66796	244035	3	3939	6619389	7079	312021	138459	62567	45	0
35	São Paulo	1975	SUDESTE	1440928	3738578	5179506	4780141	6575760	11355901	1480463	844955	11451139	18867	36888	120234	395896	2347	215156	12240527	2049766	67255000	1468041000	343000	4611888000	292498	446214	33552	23	711262	689485	145762	188163	15749	1076640	348774	66943	394736	523951	350737	14	849728	34565920	93334	2.67008e+06	199987	2146337	629577	34199
41	Paraná	1975	SUL	1179701	4447834	5627535	1683815	3299025	4982840	1955393	407860	6587064	11821	169985	157233	440867	1229	130738	7498937	5888873	29363000	518606000	976000	941100000	203421	551777	4941	0	920885	32480	642982	1949	28167	1848380	1615302	596939	272923	691528	36097.8	0	1195013	1689534	362515	37847.5	346697	3429737	3103049	380600
42	Santa Catarina	1975	SUL	42630	1391803	1434433	1977243	426786	2404029	1433854	194246	2236830	2647	41501	125619	157444	319	10202	2574562	3505778	25632000	409837000	131000	343572000	0	119441	12370	0	3747	16386	130051	1464	80525	728929	263876	32388	0	207654	127418	0	916	502093	95228	40219.7	995310	1661604	270870	21197
43	Rio Grande do Sul	1975	SUL	178896	5750594	5929490	13061024	711864	13772888	1602865	345999	12692127	3464	67344	11361709	612822	1058	29604	24768128	5612347	33066000	943461000	156000	893964000	2	543480	7440	0	32	28937	163695	7314	126448	1592300	3195977	1592726	1	1876215	53305.2	0	27	623119	111344	172258	1235053	2155592	4419465	1120144
50	Mato Grosso do Sul	1975	CENTRO-OESTE	65912	1208715	1274627	15580241	5213256	20793497	3956343	183557	8871154	41540	17452	100938	194362	675	22649	9248770	473461	2884000	90476000	39000	85860000	26028	595454	3667	0	16862	517	17501	395	5804	104163	121829	11118	31790	585439	16381.2	0	13200	10473	9743	9410.08	73719	130128	167981	5929
51	Mato Grosso	1975	CENTRO-OESTE	42174	459093	501267	8640861	2602607	11243468	7101035	23023	3110119	1715	7769	7010	89134	483	16464	3232694	459403	2344000	39138000	29000	43572000	4487	269520	3627	0	3200	2751	52744	106	6014	108678	3	0	2661	355691	29896.2	0	3119	71058	20791	4122.24	43987	93244	5	0
52	Goiás	1975	CENTRO-OESTE	76744	2484350	2561094	21712529	7451634	29164163	6369257	24799	12728294	15505	42679	49482	470647	14095	66584	13387286	2015394	8348000	506805000	34000	186396000	27121	1128759	11574	5	6705	8590	225303	601	10664	687091	61905	1	47130	1100296	138618	3	3736	338688	76278	13959.7	74056	1090193	82173	0
53	Distrito Federal	1975	CENTRO-OESTE	3714	9023	12737	87130	21962	109092	14755	306	40473	190	1163	910	3092	42	163	46033	22360	487000	4899000	2000	6648000	1	965	834	0	30	193	1131	61	319	2370	3	2	0	1147	6181.2	0	23	3410	528	1283.36	2822	2418	2	4
11	Rondônia	1985	NORTE	215465	315078	530543	221572	879304	1100876	4070888	8065	770531	2168	7730	13374	28743	836	6570	829952	502814	3813000	47279000	171000	49164000	278	152111	20282	25715	67340	286	58238	277	11361	87952	1240	0	300	224917	25449	9814	64956	4486	34187	2747.36	69520	116558	1257	0
12	Acre	1985	NORTE	17054	51665	68719	68345	257681	326026	4597272	2443	334336	625	2947	22798	10955	208	2416	374285	158558	1414000	18146000	1000	23232000	4	18765	4027	392	508	136	9054	118	8202	22019	1	0	1	19274	24653.4	85	418	1992	5383	1558.08	63769	23280	1	0
13	Amazonas	1985	NORTE	117100	169676	286776	209527	266607	476134	4283071	3271	425053	9718	12372	37354	7654	217	604	492972	180582	2052000	19325000	28000	126612000	16	5971	4658	3912	1363	470	5788	1083	79862	12488	13	0	12	7187	151439	2148	351	7061	4948	7282.24	744580	14711	12	0
14	Roraima	1985	NORTE	4657	23173	27830	1100208	147005	1247213	680426	414	306015	222	3654	19560	29480	183	182	359296	43911	309000	7426000	0	4308000	0	15483	500	6	29	33	895	186	2278	10565	45	0	0	22727	6619.8	3	17	637	537	1204.32	16145	9566	21	0
15	Pará	1985	NORTE	313278	765352	1078630	2345897	4250496	6596393	12623576	90507	3478875	208981	58779	106212	169665	13765	46062	4082339	1256746	8223000	122660000	64000	146316000	3305	264833	11654	31476	4181	4049	66999	1237	200419	202747	397	0	3305	313504	153918	22329	3345	141784	44380	8777.76	1837744	153730	326	0
16	Amapá	1985	NORTE	16251	17019	33270	455822	23072	478894	397218	57894	46986	47165	578	2289	2588	14	265	99885	21016	309000	1089000	1000	2004000	0	344	532	7	41	130	191	49	4905	781	0	0	0	367	4783.8	15	13	1467	110	319.52	36269	812	0	0
17	Tocantins	1985	NORTE	54299	600654	654953	7353321	3297579	10650900	2912432	2828	3603813	8296	24391	29478	124312	14824	43845	3848959	396475	2155000	88501000	171000	41904000	220	323234	21923	53	70	2801	18655	196	12244	84488	27140	0	220	398135	83701.2	47	106	123939	7007	3147.84	49918	70784	30034	0
21	Maranhão	1985	NORDESTE	86333	1218176	1304509	2656273	2790290	5446563	3094752	28482	3247206	85168	540874	177644	286304	174635	108215	4620046	2552834	11500000	97559000	211000	155196000	3119	636219	8128	59	353	19437	85287	1668	148736	431215	7169	0	3119	779322	89892.6	20	123	793826	28292	16270.6	807107	209138	8089	0
22	Piauí	1985	NORDESTE	330660	744289	1074949	3189138	360946	3550084	2878541	5287	1588208	705	1887477	1063401	142291	186680	38987	4907749	1476047	6565000	62336000	974000	134892000	14865	161961	2554	0	55	7640	219575	1067	39979	304990	221	0	14865	153434	13494.6	0	10	313293	53003	5471.68	213206	179245	142	0
23	Ceará	1985	NORDESTE	969939	1405726	2375665	3381575	111917	3493492	2436057	6629	2475423	401	986910	1634808	152965	183879	95449	5529835	1245467	17728000	354021000	5620000	732852000	123550	74008	29370	0	10336	39105	459903	809	94587	616725	50	11	123550	103550	172258	0	3804	1345113	88834	3952.16	334270	309581	18	3
24	Rio Grande do Norte	1985	NORDESTE	423615	605274	1028889	1460669	74049	1534718	1091395	15874	909613	36	226255	338206	30994	49196	14906	1569206	133255	2412000	140735000	935000	100548000	26668	9583	2094	0	209	50228	161450	225	42565	145317	0	0	26668	10310	19380	0	22	2546069	31060	985.44	245122	39298	0	0
25	Paraíba	1985	NORDESTE	413343	815852	1229195	1793349	188217	1981566	733869	32496	1362573	1102	402428	367014	49873	61205	29382	2273577	248308	5804000	172938000	3642000	195516000	36240	21466	10150	0	444	119765	283921	1627	45388	345161	169	0	36240	26974	156478	0	135	5577379	61667	11810.4	195007	160641	119	0
26	Pernambuco	1985	NORDESTE	255455	1594842	1850297	1501097	556210	2057307	1482439	15763	1872494	3556	1297058	545303	91410	62511	56026	3928358	545659	15890000	308419000	8194000	686268000	15560	11849	20836	9	17383	465463	483622	2560	109285	537806	457	0	15560	28067	379267	5	7333	23764059	96827	15658.2	686555	272334	326	0
27	Alagoas	1985	NORDESTE	59951	938460	998411	488332	317384	805716	212454	1065	755992	923	36045	106187	38535	6842	20674	965198	85466	2093000	110022000	279000	118488000	27283	6808	7125	0	325	484451	155802	859	20756	155667	279	0	27283	17862	51540.6	1	89	24843242	39486	4138.72	149451	52668	107	0
28	Sergipe	1985	NORDESTE	109767	204014	313781	587987	686825	1274812	158031	2854	864610	373	11194	111672	57128	9539	13171	1067687	74168	2685000	92933000	143000	52728000	9138	7914	2443	0	20	26855	48137	25866	25703	80361	24	0	9138	22816	16218	0	14	1411305	10724	204807	299062	56719	20	0
29	Bahia	1985	NORDESTE	1604300	2555823	4160123	8224059	6779801	15003860	7452846	276581	9315074	16242	2163837	1979010	673333	306488	219969	14673953	1511601	13795000	648995000	7624000	327780000	143364	64191	54000	486032	107020	50447	1025489	16173	294201	892032	51832	450	143364	59954	371270	424966	106087	2029867	322075	132997	2099198	434960	60343	143
31	Minas Gerais	1985	SUDESTE	1288913	4051197	5340110	20624740	8299443	28924183	5478555	1767861	19983506	25747	95434	106868	1027532	25819	181802	21446708	3008826	45185000	3772411000	3010000	1823028000	156605	628800	36081	16	767542	243684	732582	27385	97752	1584615	362730	9047	156605	648956	262089	14	1342516	11222122	213136	276997	446241	2405345	638558	18463
32	Espírito Santo	1985	SUDESTE	716642	355308	1071950	1156817	722800	1879617	399274	156785	1759823	820	13134	20380	79267	2389	23125	1898938	434578	6663000	281412000	118000	352668000	34	45849	27641	20226	443030	42829	106167	3324	33634	142925	275	0	34	67916	237385	12104	478842	2410644	43741	20780	325917	161617	209	0
33	Rio de Janeiro	1985	SUDESTE	153974	470725	624699	1437879	319227	1757106	463183	39663	1788180	3087	22124	21019	81879	1214	16402	1933905	274893	10180000	424191000	743000	346140000	0	41715	32053	8	16657	183220	18967	29723	17771	58635	40	0	0	85200	286192	4	17282	8030833	9411	298083	129011	75385	18	0
35	São Paulo	1985	SUDESTE	1613953	4910848	6524801	2554551	7371939	9926490	1399237	912730	12210369	38158	43868	234641	519767	6093	126600	13179496	1888394	85560000	1810408000	875000	5986980000	571022	228697	42414	553	723387	1694994	291923	485761	27517	1040044	470057	138260	571022	319094	417200	130	1048578	125000840	184707	8100188	356861	2495239	952196	262528
41	Paraná	1985	SUL	628074	5434485	6062559	1422884	4576720	5999604	2013930	819556	8574564	57873	170105	336123	521984	3461	103509	9767619	4482258	57490000	919892000	2027000	1681740000	846682	166772	5433	0	422762	144412	787553	7377	69600	1940642	2079973	1228742	846682	186785	90474	0	569186	10373983	427526	74821.6	930207	4150534	4161322	2361000
42	Santa Catarina	1985	SUL	90029	1778803	1868832	1927609	541669	2469278	1345539	564124	2742896	20043	42869	159095	143268	317	5243	3113731	3185301	54051000	603704000	86000	784188000	16	120350	25044	0	1009	32016	340918	3449	74116	850628	403530	35035	16	327633	267862	0	592	907820	247990	52024.2	882630	1942966	519730	38278
43	Rio Grande do Sul	1985	SUL	183784	6408301	6592085	11939994	1023466	12963460	1664612	567848	13509324	23238	87180	8394915	572352	1015	13823	22601847	4225303	60565000	1280804000	313000	1588128000	0	798709	7530	0	47	45827	214384	16756	132305	1425922	3611032	952173	0	3537302	86812.2	0	25	1045777	131587	191010	1225689	2428297	5710859	904728
50	Mato Grosso do Sul	1985	CENTRO-OESTE	28501	1874469	1902970	9658224	12144529	21802753	4170597	454251	15017906	25520	21808	204453	271516	2401	31772	15575376	400656	2801000	268014000	41000	150492000	90479	219533	4343	0	9557	43246	42841	654	12724	159985	958568	153661	90479	235347	17880.6	1	6344	2454098	24336	6667.52	132146	254314	1811881	238085
51	Mato Grosso	1985	CENTRO-OESTE	136605	1992838	2129443	9685306	6719064	16404370	14126813	26171	6545956	18011	13903	35118	148351	1805	35294	6798438	671150	3673000	122917000	435000	57744000	11978	446846	23160	2342	29868	19051	42051	739	16451	157444	822821	197	11978	608945	111211	1039	35116	1086341	22308	5092.64	99774	239912	1610530	361
52	Goiás	1985	CENTRO-OESTE	62974	2865225	2928199	9569989	11324595	20894584	2828529	83630	14476565	21317	32799	78721	460586	5236	34787	15110011	1442031	11448000	1055295000	81000	641820000	98002	693105	13482	0	12416	77196	265727	2968	12623	741840	599555	395	98002	771280	95553.6	0	13946	4439246	101683	25331	54273	1507916	1157704	427
53	Distrito Federal	1985	CENTRO-OESTE	8556	76938	85494	78850	63555	142405	21426	23540	75866	217	2189	2718	6309	239	199	87737	34981	2446000	14986000	36000	209880000	1	8202	390	0	735	332	1732	377	618	5434	37055	109	1	9418	3896.4	0	739	4910	880	1227.52	2483	8844	66254	267
11	Rondônia	1995	NORTE	254334	243040	497375	343369	2.5787e+06	2.92207e+06	5.09042e+06	41040.2	3937291	10530	13505	61799	106602	1069	12711	4143507	410315	4896000	343069000	26000	92976000	2282.6	79414.6	2198.81	11850.1	96625	546.37	80013.6	984.33	5373.71	105041	744.01	0.02	2130	87656	21583.2	3604	78918	23027	47930	8261.44	53572	133730	1505	0
12	Acre	1995	NORTE	16520.1	89850.5	106371	62020.4	552193	614214	2.32711e+06	11298	847208	919	4798	40258	20872	328	3826	918209	161181	1416000	32538000	28000	22464000	22.14	17339.7	3300.14	25.85	316.62	192.28	10114.1	499.65	13892.4	22816.5	12	0	24	19938	35159.4	16	361	2841	5369	3506.08	124842	27794	15	0
13	Amazonas	1995	NORTE	97881.7	233845	331727	320616	208297	528913	2.14421e+06	1105.16	733910	37717	10398	44578	9098	154	696	836551	230803	2130000	27005000	10000	138516000	18.31	4557.38	41255.6	1436.81	449.81	678.68	4595.8	2436.86	90731.8	10127.7	50.62	0	16	6429	172574	988	277	8547	3939	9780.64	843595	13051	27	0
14	Roraima	1995	NORTE	64404.9	121935	186340	1.24654e+06	296024	1.54257e+06	1.02197e+06	1414.45	399939	468	5227	34682	27950	172	933	469371	56529	582000	9534000	4000	19728000	10.64	14755	3967.26	4.64	42.09	150.02	773.1	501.73	4131.99	11246.8	573.39	0	15	30520	20043	6	36	581	561	1163.52	25246	14525	670	0
15	Pará	1995	NORTE	262435	994282	1.25672e+06	1.63081e+06	5.82492e+06	7.45573e+06	1.15931e+07	114369	6080431	312646	34050	91541	197908	16083	59849	6792508	1116731	15867000	287217000	56000	161352000	1054.96	181942	19376.1	27895.3	8421.9	1941.33	47678.7	10300.2	154916	160380	190.3	11.05	1026	197566	108059	15061	6415	55594	25502	67920	1366073	137696	222	7
16	Amapá	1995	NORTE	9740.58	47808.3	57548.9	219458	25520.1	244978	289689	84937	59700	123364	721	2540	2785	144	367	189621	14213	83000	2049000	0	4044000	0	696.77	790.49	27.22	33.45	107.71	294.84	311.55	2456.43	486.06	0	0	0	548	4202.4	24	20	2473	149	3241.76	22315	359	0	0
17	Tocantins	1995	NORTE	22528.1	620409	642937	5.80095e+06	5.27721e+06	1.10782e+07	3.03593e+06	77.94	5218142	12840	15258	48238	141689	13961	51025	5501153	217508	2399000	144921000	49000	87132000	196.6	137886	7327.98	29.86	15.67	2071.79	4972.74	415.37	6361.6	48083.3	7041.09	0	201	261184	35761.2	31	10	89693	1920	2538.4	30550	70369	14098	0
21	Maranhão	1995	NORDESTE	80579.8	1.73398e+06	1.81456e+06	2.40374e+06	2.90681e+06	5.31055e+06	2.84793e+06	27840.1	3902609	56617	314670	146187	164282	144026	118315	4846706	1936874	11470000	139451000	353000	192132000	1046.57	409848	12653.8	2.62	76.86	16906.4	63292.6	1836.91	107489	287793	62326	0	1875	561255	98929.8	2	54	829259	19815	9027.2	584728	178357	135122	0
22	Piauí	1995	NORDESTE	169431	1.07528e+06	1.24471e+06	1.93901e+06	459438	2.39845e+06	3.64315e+06	3005.61	1704389	565	1541536	1295805	144513	194429	38099	4919336	1394406	8271000	73459000	1250000	145632000	14151.2	127214	2156.26	0	21.43	7987.7	184344	652.24	37158.1	229613	8635	0	5431	160678	18349.8	0	6	502439	52661	4643.68	215627	150397	20293	0
23	Ceará	1995	NORDESTE	476269	1.60932e+06	2.08559e+06	2.43467e+06	197448	2.63212e+06	2.70024e+06	24626.4	2382474	943	795690	1606093	137893	193176	77266	5193535	1047451	20690000	384836000	2333000	861288000	8268.63	52011.2	35841.8	0.01	6683.75	20844.3	378784	1515.84	42179.4	469754	30.26	0.06	5671	111549	283968	0	2833	1029296	121960	10191.7	270574	371174	60	0
24	Rio Grande do Norte	1995	NORDESTE	169818	635019	804837	1.1583e+06	87916.1	1.24622e+06	1.12166e+06	5322.22	954347	109	209980	385560	31148	49677	12017	1642838	97235	4165000	158815000	229000	222672000	16774.8	7207.01	2596.2	0	50.19	67368	124896	275.67	25236.9	130256	7.13	0	6378	6968	22093.2	0	18	3183534	31202	784.96	130451	54455	4	0
25	Paraíba	1995	NORDESTE	94817.4	789533	884350	1.6591e+06	192838	1.85193e+06	676819	15106.4	1327826	575	403801	438430	49655	64071	22056	2306414	119006	6832000	154923000	1248000	331680000	14284.3	15615.1	15020	0	127.71	213760	211190	1330.24	27197.2	226436	171.32	0	8513	20132	124664	0	62	8732246	53430	7207.52	112580	126974	78	0
26	Pernambuco	1995	NORDESTE	130671	1.34247e+06	1.47314e+06	1.43069e+06	700316	2.131e+06	1.23243e+06	13537.2	1930672	7597	960567	671177	97263	57158	38535	3762969	378910	24646000	406606000	2335000	1014768000	3478.8	4088.25	31605.6	30.96	7985.08	355789	345903	2571.98	54311.1	338551	100.41	0	1479	12869	335723	9	5309	15319310	117095	12294.2	296105	207008	199	0
27	Alagoas	1995	NORDESTE	66444.1	855025	921469	489864	372570	862434	174142	2238.84	968462	2478	22136	89933	43059	5791	13116	1144975	93865	4497000	188172000	359000	124020000	2388.24	7799.56	3472.48	0.08	44.85	367452	144825	2108.23	24139.8	64938.3	49.36	0	2721	9478	41962.8	0	42	20545778	65215	25056	194231	67306	88	0
28	Sergipe	1995	NORDESTE	112727	197636	310364	624514	529350	1.15386e+06	155543	2914.84	940996	285	5704	77439	64513	9666	13389	1111992	78809	4218000	134392000	97000	113208000	636.02	2389.8	3121.74	0.74	38.2	14256.6	48998.7	45913.2	19439.5	63346	67.44	0	369	5539	22684.8	0	29	660319	19687	414769	148968	55057	85	0
29	Bahia	1995	NORDESTE	1.34874e+06	3.46815e+06	4.8169e+06	7.83681e+06	6.65295e+06	1.44898e+07	6.83913e+06	297429	8729953	11828	1922373	2007356	635686	303390	198582	13809168	1211160	18269000	633339000	7071000	540828000	101407	50348.1	32539.1	617945	111859	60862	759511	37876.9	211402	544098	355101	303.95	43773	58639	171258	215489	95587	1483174	265646	255236	869629	596133	721321	379
31	Minas Gerais	1995	SUDESTE	1.18805e+06	3.72744e+06	4.91549e+06	1.36544e+07	1.16942e+07	2.53486e+07	5.67031e+06	1.70778e+06	20044616	20207	61414	125226	939327	28254	149769	21368813	2631321	67998000	5499862000	2062000	2418468000	39118.8	148118	47177	51.42	790030	270373	435662	51325.9	67532.2	1.20447e+06	442943	2715.39	46678	167183	259478	50	1506697	11812913	205830	510033	311495	3062316	864899	8636
32	Espírito Santo	1995	SUDESTE	635077	238521	873598	762638	1.05843e+06	1.82107e+06	371862	172725	1788748	860	14252	26913	66237	1753	13365	1912128	266238	7629000	308002000	441000	420804000	1.18	12389.4	17265.7	18541.5	437143	38664.8	39503	2790.37	19665.9	54767.9	12.59	3.7	2	16949	138047	6165	665727	1782901	21197	19982.2	155389	75299	7	10
33	Rio de Janeiro	1995	SUDESTE	78758.1	296352	375111	901030	644093	1.54512e+06	323105	25881.4	1813743	3485	13452	18698	74425	852	10001	1934656	169338	21256000	434719000	848000	224604000	12.75	10548.4	7069.4	0.56	12101.8	136693	12920	6510.81	6197.22	23740.6	1.12	1	21	17250	81895.8	0	9395	5709829	5094	40461.6	40464	33654	2	2
35	São Paulo	1995	SUDESTE	1.36861e+06	4.11802e+06	5.48663e+06	2.00643e+06	7.05582e+06	9.06225e+06	1.35238e+06	597000	12306790	36993	31636	263217	471664	4407	47979	13162686	1429746	168022000	1847069000	1278000	7368924000	91314.6	33242.8	41602.1	187.6	214733	2.1245e+06	151107	718915	19409	851764	396615	11000.6	150979	57871	393332	150	340938	153768088	173971	1.06096e+07	207781	2730327	850481	21297
41	Paraná	1995	SUL	311374	5.17617e+06	5.48754e+06	1.37748e+06	5.29983e+06	6.67731e+06	2.08159e+06	713126	9900885	55426	66692	574752	492288	3592	59285	11152920	4026192	94466000	1355487000	346000	2392536000	170900	78675.2	7194.4	52.78	103935	237476	467659	18781.5	102674	1.94591e+06	2.1765e+06	457044	267443	142066	66840.6	34	109472	18442316	381798	160595	1437763	6599294	6070726	849702
42	Santa Catarina	1995	SUL	126580	1.5959e+06	1.72248e+06	1.77879e+06	560115	2.33891e+06	1.34861e+06	561549	3097351	15048	23253	202694	127483	489	2684	3469002	4535571	85567000	869419000	367000	1323960000	0	111441	23761.9	0	74.36	24693.7	254790	9370.52	40426.4	754966	167680	29942.8	0	497453	252940	0	256	518194	223285	75816.5	431095	2305144	408863	44758
43	Rio Grande do Sul	1995	SUL	208993	6.03267e+06	6.24166e+06	1.05236e+07	1.15676e+06	1.16803e+07	1.88149e+06	630138	13221297	65917	61351	5081387	494785	1339	6150	18932226	3933845	100074000	1885640000	345000	2707536000	14.88	906205	8969.61	0.02	16.74	58674.2	181913	21354.2	92839.7	1.21978e+06	2.24692e+06	305020	15	4645430	74551.8	1	15	1237284	104817	183821	822870	2885345	4253176	457943
50	Mato Grosso do Sul	1995	CENTRO-OESTE	16215.1	1.48568e+06	1.5019e+06	6.08278e+06	1.57279e+07	2.18107e+07	5.69666e+06	181080	19754356	10799	20303	346431	318140	3319	38184	20491532	508813	10971000	385526000	275000	225720000	48799.2	59946.8	1648.64	4.84	1726.24	78346.8	17302.9	828.17	14367.5	416684	746168	31572.8	76709	162394	15432.6	3	1188	5160331	12613	5972.32	244549	1328031	1796995	34619
51	Mato Grosso	1995	CENTRO-OESTE	169734	3.27643e+06	3.44616e+06	6.18957e+06	15262488	2.14521e+07	2.14758e+07	67829.1	14408869	24314	20118	159746	249557	3394	50781	14916779	671789	13066000	375426000	90000	207336000	34105.1	341412	28678.7	1689.55	16243.6	129901	17482.3	1113.45	11683.4	470606	1.73929e+06	0	46521	588324	92473.2	463	9248	8289396	11681	5986.88	43709	1208598	4435965	0
52	Goiás	1995	CENTRO-OESTE	55787.4	2.36362e+06	2.41941e+06	5.13729e+06	1.42674e+07	1.94047e+07	3.77465e+06	72652.2	16488390	22360	15208	109352	449527	4996	37978	17127811	1004074	13281000	1830057000	150000	876324000	69198.6	152254	12180.4	0.1	2658.16	92216.3	77292.8	5736.71	13435.2	768086	863422	3831.65	146206	201117	100307	0	3635	6659027	84775	49913	111145	2971578	1960113	9680
53	Distrito Federal	1995	CENTRO-OESTE	5100.6	61242.7	66343.3	34004.7	62442.7	96447.4	27706.6	19980.1	85615	32	2318	3934	6377	88	191	98555	69321	5778000	19716000	250000	386316000	0	482.92	197.84	0	796.12	306.59	3763.58	629	380.51	24160.6	24543.8	1282	0	520	1060.8	0	1600	6639	6507	5025.12	1679	107023	50228	6102
11	Rondônia	2006	NORTE	254151	249733	503884	278931	4565838	4844769	2856050	18667	8542726	3774	10815	88262	138461	1146	17096	8802280	317396	4904000	639437000	26000	97536000	728	47803	1958	9793	122324	1155	92953	378	13485	66165	42471	0	0	93764	8177	5952	78285	32360	27211	3795	92279	155733	125184	0
12	Acre	2006	NORTE	63628	100516	164144	159581	891734	1051315	2145882	7684	1736100	753	7298	47878	42929	402	4429	1839789	120591	1441000	29622000	12000	17196000	2	23403	2848	0	713	424	13740	105	20365	31493	0	0	0	60470	23334	0	993	1453	14342	1594	198060	83036	0	0
13	Amazonas	2006	NORTE	337407	528678	866085	232326	588153	820479	1775506	16225	1170638	42431	14830	53323	16823	174	1060	1299279	145135	2551000	32672000	29000	212664000	0	3140	3971	701	491	1473	8375	971	157295	16303	0	0	0	6514	38749	1321	444	33864	5132	7497	359967	20658	0	0
14	Roraima	2006	NORTE	51203	65052	116255	404385	319530	723915	765286	2565	536396	93	5712	25659	20664	215	553	589292	42970	314000	7224000	1000	1896000	0	15914	2050	0	5	28	304	53	4110	6900	3513	0	0	72334	13414	0	24	338	199	597	6721	15739	9145	0
15	Pará	2006	NORTE	1022648	862057	1884705	1861673	9207572	11069245	8533265	62164	13933867	367587	75306	181426	284417	14640	79817	14937060	705523	16584000	476332000	59000	337260000	2	202727	5080	36998	1904	1417	60915	5991	329910	122993	17033	0	0	263720	37739	28840	1770	22642	41847	91191	3075915	294583	56142	0
16	Amapá	2006	NORTE	34616	26508	61124	222809	43751	266560	384888	96245	78815	171801	1251	2274	6260	33	209	260643	14537	52000	1070000	0	756000	0	402	47	1	0	43	133	191	2575	629	0	0	0	853	565	3	1	1849	44	3356	16236	806	0	0
17	Tocantins	2006	NORTE	93715	538113	631828	2840197	5272814	8113011	4593889	41966	6565729	4743	21869	81345	142187	6630	37776	6860279	252776	4542000	181726000	54000	49428000	0	71011	1493	0	0	3318	5107	106	5631	35717	204625	0	0	228070	15781	0	0	169008	3980	1230	48094	103475	498334	0
21	Maranhão	2006	NORDESTE	313758	2139672	2453430	1713324	4038624	5751948	3214331	51076	5812164	50543	303120	172184	149909	71092	67369	6626381	698858	7726000	174525000	214000	49032000	30383	523471	4075	0	12	10989	86502	98	245136	236360	290025	0	93508	1092712	63130	0	3	749021	39052	2039	1084068	627223	769194	0
22	Piauí	2006	NORDESTE	251390	1099829	1351219	2064341	625478	2689819	4015424	28209	1667456	57	1457324	1317290	101952	113250	28630	4685959	966924	8032000	85933000	2376000	165360000	576	128881	834	0	2	9485	228336	67	39963	223010	214653	0	208	299214	42275	0	1	552204	91789	587	203137	332579	561694	0
23	Ceará	2006	NORDESTE	584487	1337550	1922037	2300138	314006	2614144	2072377	13950	2162843	692	748866	1564907	102506	106701	50678	4737193	690966	20556000	459331000	1847000	891312000	2230	47705	20142	0	1697	17144	744868	392	63305	947353	543	0	2921	168138	486727	0	1048	717729	425485	4515	426155	1596189	1303	0
24	Rio Grande do Norte	2006	NORDESTE	182967	491690	674657	1115289	84238	1199527	780659	4770	907157	760	273291	409406	32542	25809	9206	1658171	78331	6059000	193085000	2508000	277680000	2449	5689	2371	0	11	37760	169533	3	20589	93326	14	65	2418	11947	53943	0	1	1487100	74632	15	115160	139435	11	132
25	Paraíba	2006	NORDESTE	87281	575931	663212	1471068	208697	1679765	886637	4327	1354426	0	461130	442302	47073	46559	15603	2367093	105997	9451000	232594000	4436000	282564000	4101	13711	7785	0	21	79972	250159	955	20132	342673	0	9	4437	31716	165553	0	9	3592591	101561	14924	92380	202148	0	25
26	Pernambuco	2006	NORDESTE	213554	1481971	1695525	1315143	660061	1975204	1121335	20887	1880430	2483	1037011	942259	114522	47366	27833	4051904	278476	36607000	468329000	2934000	2346084000	307	2832	25715	0	2951	317196	375051	779	78251	359070	61	0	187	13167	481063	0	2123	17150593	171656	11431	326371	486626	41	0
27	Alagoas	2006	NORDESTE	84907	819284	904191	522540	349786	872326	198958	1407	919865	14	33909	133539	46651	7509	8711	1150198	93270	5590000	176588000	422000	299472000	1985	3297	4203	0	14	583691	404651	4468	52721	107476	0	0	663	20454	53021	0	42	34165549	141258	158652	494351	161111	0	0
28	Sergipe	2006	NORDESTE	113720	203384	317104	389659	555393	945052	134637	1328	899298	329	15028	133251	54789	8919	10933	1122547	80144	5418000	148409000	134000	128628000	0	3935	2961	0	0	13462	38118	30134	30988	104300	0	0	0	16208	28500	0	0	669087	23295	472773	237839	207450	0	0
29	Bahia	2006	NORDESTE	1688656	3512108	5200764	5134109	7728784	12862893	8493294	445548	10229459	7302	2138983	2672263	522811	168867	135084	15874769	947488	20961000	786891000	11911000	439920000	221558	14884	37117	453701	107023	57493	605040	27328	221578	725896	903846	0	664213	21489	502697	155553	152234	2854210	471216	410978	852090	1732317	2341602	0
31	Minas Gerais	2006	SUDESTE	1732286	3592887	5325173	7276892	10935095	18211987	6306071	823863	20332313	18659	74268	209734	699205	17444	93743	21445366	3329671	83509000	5720443000	3021000	3723564000	10007	42617	25232	101	819488	308208	256422	14301	48227	1093336	761000	6455	28896	125934	363954	64	1295753	20018259	310272	206691	421980	5117850	1998514	25526
32	Espírito Santo	2006	SUDESTE	565758	185703	751461	120147	1221430	1341577	399666	186052	1791501	605	10256	33187	47480	723	6409	1890161	227107	16414000	323573000	176000	1702728000	0	1966	13201	13903	348193	68937	21162	901	15087	29520	0	0	0	3765	104443	7014	404343	3796326	11767	10567	193960	51870	0	0
33	Rio de Janeiro	2006	SUDESTE	77447	272003	349450	657717	631967	1289684	281550	12564	1924217	872	15418	43659	74910	419	6191	2065686	113433	12779000	432355000	1051000	90324000	0	1670	7666	6	9714	85619	5241	1643	9018	5473	0	0	0	7149	56596	2	10346	3577236	6849	19454	65920	21269	0	0
35	São Paulo	2006	SUDESTE	1691205	5284224	6975429	2900390	4071409	6971799	1794412	348109	10505925	36663	45587	486892	302137	1728	18608	11397540	1562282	236149000	1270615000	1947000	8804436000	14663	10566	38509	0	165829	3022002	84782	468550	52169	487819	370438	27299	35232	33665	633939	0	279535	239217363	144870	10032523	629485	2285833	954551	67252
41	Paraná	2006	SUL	983859	5527976	6511835	1315298	3417233	4732531	2648962	618040	9118107	14125	123784	510105	291450	1212	22799	10081582	4569275	223742000	1828580000	358000	5271996000	11026	22411	6719	0	88616	298166	322236	11172	94035	2027959	3492377	546355	18669	86014	142011	0	168226	23433890	486898	232695	1246750	9195317	8758608	938688
42	Santa Catarina	2006	SUL	219966	1502665	1722631	1259074	448181	1707255	1485432	621434	3125989	6833	39841	194100	80561	278	911	3448513	6569714	179864000	1396222000	575000	2875440000	0	132453	23170	0	9	6468	122243	3143	35903	886449	273354	37948	0	844001	652415	0	14	144662	184745	73066	596869	4110095	724871	96163
43	Rio Grande do Sul	2006	SUL	294042	6660897	6954939	8268128	974984	9243112	2072504	777221	11334510	46634	95092	3476877	382590	3610	3172	15342485	5611431	129987000	2458333000	636000	3334044000	0	875092	8357	0	2	29693	189490	8336	88288	1259268	3491862	634559	0	5631253	84435	0	8	723013	107212	98112	586479	5112139	7924427	1009918
50	Mato Grosso do Sul	2006	CENTRO-OESTE	61578	2177810	2239388	6220547	14834582	21055129	5857084	103469	20634817	7882	20435	384318	249242	1700	27442	21325836	864317	24768000	383880000	133000	362508000	22703	20048	338	0	1077	154749	11659	126	26872	619844	1459903	23656	65069	92606	2331	0	1391	11220008	12753	1299	349249	2173674	3859357	39669
51	Mato Grosso	2006	CENTRO-OESTE	403338	6014077	6417415	4404165	17648852	22053017	18713158	58939	20666147	6872	28884	354698	249376	2431	48080	21356488	1292222	30285000	553807000	70000	227136000	374830	139803	3318	171	7728	122008	10683	110	13313	1123707	4110237	0	1111906	319259	23240	45	6579	7.78928e+06	16992	922	108344	4121537	11524070	0
52	Goiás	2006	CENTRO-OESTE	251194	3533846	3785040	3148571	12687022	15835593	5373197	71897	18234548	13297	21623	162558	332757	2198	26209	18793190	1401153	43775000	2088213000	301000	1089312000	36265	47916	7832	0	1427	228126	51674	2793	12567	622857	2026214	2995	105863	109355	68759	0	3031	16558249	98019	39793	68936	2947314	5484224	10097
53	Distrito Federal	2006	CENTRO-OESTE	6020	91462	97482	32920	46877	79797	57868	3025	81441	776	2639	16046	7117	51	168	108238	109364	11398000	18079000	511000	301128000	1721	159	130	0	604	331	14244	375	1006	20033	41949	732	4984	732	1225	0	732	7506	28928	10117	7753	122092	112436	3918

## Sheet: FE_ConvertionFactors
Main products of Brazilian agriculture production	Abbreviation	Partition (DM basis)	Harvest Index (HI)	By-Product Conversion (per ton of main product)	DM Factor (% as-is)	Protein (% DM)	Gross Energy (GJ/tonne DM)	Human metabolizable energy (GJ/tonne DM)	Pig metabolizable energy (GJ/tonne DM)	Poultry metabolizable energy (GJ/tonne DM)	Pig & Poultry mean metabolizable energy (GJ/tonne DM)	Alocation
Cotton (whole seeds)	ALGTOT
Cotton seeds whole	ALGPRI		0.6	-	0.923	0.218	23.8	-	-	-	-	Industrial processing
Cotton oil	ALGBY1	0.2	-	-	1	0	39.3	37	-	-	-	Food
Cottonseed meal	ALGBY2	0.7	-	-	0.929	0.374	21.5	-	12.3	9.4	10.85	Feed
Linter	ALGBY3	0.1	-	-	0.947	0	39.6	-	-	-	-	Energy
Cotton lint		-	-	0.4	-	-	-	-	-	-	-	-
Harvest residues
Crop residues		-	0.4	-
Cotton straw	ALGHR1	0.7	-	-	0.757	0.064	18.8	-	-	-	-	Field residue
Cotton leaves	ALGHR2	0.3	-	-	0.273	0.122	19	-	-	-	-	Field residue
Rice (grains with hulls)	ARRTOT
Rice grain with hulls	ARRPRI		0.45	-	0.901	0.098	18.4	-	-	-	-	Industrial processing
Rice grain	ARRBY1	0.5	-	-	0.892	0.104	18	16.7	-	-	-	Food
Rice bran	ARRBY2	0.1	-	-	0.901	0.148	21.2	-	15.6	12.7	14.15	Feed
Rice broken	ARRBY3	0.2			0.892	0.104	18	-	13.202	10.7478	11.9749	Feed
Rice hulls	ARRBY4	0.2	-	-	0.919	0.037	16.3	-	-	-	-	Energy
Harvest residues												-
Rice straw	ARRHR1	-	0.55	-	0.928	0.042	15.5	-	-	-	-	Field residue
Banana (bunches)	BANTOT
Banana bunches	BANPRI		0.125	-	-	-	-	-	-	-	-	-
Banana fruits	BANBY1	0.7	-	-	0.22	0.053	17.2	15.2	-	-	-	Food
Banana peels and bunch residues	BANBY2	0.3	-	-	0.154	0.071	18.4	-	-	-	-	Waste
Harvest residues
Banana aerial parts	BANHR1	-	0.875	-	0.16	0.166	17.7	-	-	-	-	Field residue
Cocoa (beans)	CACTOT
Cocoa beans	CACPRI	-	-	-	0.97	0.2	17.8	9.55	-	-	-	Food
Harvest residues
Cocoa pod husks	CACHR1	3	-	-	0.91	0.077	17.4	-	-	-	-	Field residue
Coffee (beans)	CATOT
Coffee bean (roasted, ground)	CAFPRI				0.945	0.146	19.92	16.6				Food
Sugarcane (stems)	CANTOT
Sugarcane stems	CANAPRI	-	0.6	-	-	-	-	-	-	-	-	-
Sugarcane tops and leaves	CANBY1	0.08	-	-	0.28	0.05	17	-	-	-	-	Energy
Sugarcane stems	CANBY2	0.92	-	-	0.27	0.015	17	-	-	-	-	Industrial processing
Sugarcane processing
Cane bagasse	CANBY3	0.28	-		0.46	0.018	18.4	-	-	-	-	Energy
By-Products (sugar production)		0.43
Cane molasses	CANBY4	0.05	-		0.73	0.055	14.7	-	-	-	-	Industrial processing
Cane filter cake	CANBY5	0.03	-		0.25	0.055	24.6	-	-	-	-	Fertilizer
Brown sugar	CANBY6	0.118	-		0.975	0	17.5	16.2				-
By-Products (ethanol production)		0.57
Ethanol	CANBY7	0.0632			-	-	-	-	-	-	-	Energy
Cane vinasse	CANBY8	1.0973			0.061	0.122	12.8	-	-	-	-	Fertilizer
Harvest residues
Sugarcane straw	CANHR1	-	0.4	-	0.424	0.052	17	-	-	-	-	Field residue
Common beans (grains)	FEITOT
Common bean grains	FEIPRI		0.4		0.891	0.248	18.6	13.13	-	-	-	Food
Harvest residues
Tops and leaves	FEIHR1		0.6		0.88	0.071	17.9	-	-	-	-	Field residue
Orange (fruits)	LARTOT
Orange fruits	LARPRI	-	-	-	0.135	0.074	17.6	9	-	-	-	-
Orange fruits in natura	LARBY1	0.3	-	-	0.135	0.074	17.6	9	-	-	-	Food
Processed orange		0.7										Industrial processing
Citrus pulp, fresh	LARBY2	0.5	-	-	0.23	0.06	18.1	-	13	5.8	9.4	Feed
Citrus juice, concentraded	LARBY3	0.0478516	-	-	0.4225	0.06	15.76	9	-	-	-	Food
Cassava (tubers)
Cassava tuber	MANPRI	-	0.55	-	0.376	0.026	17.1	12.8	-	-	-	Food
Harvest residues
Cassava leaves and foliage	MANHR1	-	0.45	-	0.225	0.249	19.9	-	-	-	-	Field residue
Maize (grains)	MILTOT
Maize grains	MILPRI		0.5	-	0.88	0.1	18.8	16	-	-	-	-
Maize grains for humans	MILBY1	0.4			0.88	0.1	18.8	16	-	-	-	Food
Maize grains for animals	MILBY2	0.6			0.88	0.1	18.8	-	16.4	15.7	16.05	Feed
Harvest residues
Maize stover	MILHR1	-	0.5	-	0.85	0.055	16.5	-	-	-	-	Field residue
Soybean (grains)	SOJTOT
Soybean seeds	SOJPRI	-	0.5	-	0.91	0.4	23.4	19	-	-	-	-
Soybeans seeds for humans	SOJBY1	0.2	0.5	-	0.91	0.4	23.4	19	-	-	-	Food
Processed Soybean		0.8										Industrial processing
Soybean oil	SOJBY2	0.15		-	1	0	39.3	37	-	-	-	Food
Soybean meal	SOJBY3	0.85		-	0.879	0.518	19.7	-	16.8	10.9	13.85	Feed
Harvest residues
Soybean stalks & husks	SOJHR1	-	0.5	-	0.9	0.05	16.5	-	-	-	-	Field residue
Wheat (grains)	TRITOT
Wheat grain	TRIPRI	-	0.4	-	0.88	0.13	18.4	16	-	-	-	Industrial processing
Wheat flour	TRIBY1	0.8			0.86	0.115	18.3	16	-	-	-	Food
Wheat bran	TRIBY2	0.2			0.87	0.173	18.9	-	10.8	7.8	9.3	Feed
Harvest residues
Wheat straw	TRIHR1	-	0.6	-	0.91	0.042	18.5	-	-	-	-	Field residue
Main products of Brazilian livestock production	Abbreviation	Offtake (number slaughtered per number of animals in stock)	Average carcass weight all slaughtered animals (ton)	Production per number of cattle in stock (ton)	DM Factor (% as-is)	Protein (% DM)	Gross Energy (GJ/tonne DM)	Human metabolizable energy (GJ/tonne DM)	Pig metabolizable energy (GJ/tonne DM)	Poultry metabolizable energy (GJ/tonne DM)	Pig metabolizable energy (GJ/tonne DM)	Alocation
Animal conversion rates - carcass
Bulls/Cattle carcass	CARCAT	-	-	0.0352394	0.407	0.462	26.1	17.6	-	-	-	Food
Goats and sheep carcass	CARGSH	0.25	0.01565	0.0039125	0.4288	0.425	26.5	17.9	-	-	-	Food
Horses, donkeys and mules carcass	CARHOR	0.05	0.20171	0.0100855	0.5	0.417	26.5	17.9	-	-	-	Food
Pigs	CARPIG	-	-	0.0426812	0.454	0.386	29.5	23.6	-	-	-	Food
Poultries	CARPOU	-	-	0.0051	0.405	0.435	26	16.6	-	-	-	Food
Animal conversion rates - milk & egg
Cattle milk	MILCAT	-	-	-	0.122	0.265	31.5	21.86	-	-	-	Food
Goats and sheep milk	MILGSH	-	-	-	0.122	0.265	31.5	21.86	-	-	-	Food
Chicken eggs	EGGCHI	-	-	-	0.323	0.35	29.1	17.2	-	-	-	Food
Feed to food	Abbreviation	Feed share	Feed to live weight conversion rates	Live weight to carcass conversion rates
Animal conversion rates - feed to meat
Pig	F2MPIG	0.5	0.25	0.7	0.454	0.386	29.5	23.6	-	-	-	Food
Chicken	F2MCHI	0.5	0.5	0.6	0.405	0.435	26	16.6	-	-	-	Food

## Sheet: DB_FEConversion
STATES AND YEARS ANALIZED				PROTEIN				GROSS ENERGY				METABOLIZABLE OR DIGESTIBLE ENERGY		PROTEIN					GROSS ENERGY					METABOLIZABLE OR DIGESTIBLE ENERGY					PROTEIN			GROSS ENERGY			METABOLIZABLE OR DIGESTIBLE ENERGY	PROTEIN		GROSS ENERGY		METABOLIZABLE OR DIGESTIBLE ENERGY	PROTEIN	GROSS ENERGY	METABOLIZABLE OR DIGESTIBLE ENERGY	PROTEIN
CODST	STATE	YEAR	REGION	ALGBY1_PR	ALGBY2_PR	ALGHR1_PR	ALGHR2_PR	ALGBY1_GE	ALGBY2_GE	ALGHR1_GE	ALGHR2_GE	ALGBY1_ME	ALGBY2_DE	ARRBY1_PR	ARRBY2_PR	ARRBY3_PR	ARRBY4_PR	ARRHR1_PR	ARRBY1_GE	ARRBY2_GE	ARRBY3_GE	ARRBY4_GE	ARRHR1_GE	ARRBY1_ME	ARRBY2_DE	ARRBY2_ME	ARRBY3_DE	ARRBY3_ME	BANBY1_PR	BANBY2_PR	BANHR1_PR	BANBY1_GE	BANBY2_GE	BANHR1_GE	BANBY1_ME	CACPRI_PR	CACHR1_PR	CACPRI_GE	CACHR1_GE	CACPRI_ME	CAFPRI_PR	CAFPRI_GE	CAFPRI_ME	CANBY1_PR	CANBY2_PR	CANBY3_PR	CANBY4_PR	CANBY5_PR	CANBY6_PR
11	Rondônia	1975	NORTE	0	10.4581	0.97219	0.286432	337.98	601.202	285.581	44.6082	318.2	303.397	5825.32	1674.7	2330.13	854.081	5982.73	1.00823e+06	239890	403291	376257	2.20791e+06	935412	160115	188970	268298	374165	270.987	108.906	6172.73	87942.8	28223.5	658177	77716.9	0.388	0.42042	34.532	95.004	18.527	141.971	19370.3	16141.9	1.20288	4.00172	2.29076	0.852935	0.175261	0
12	Acre	1975	NORTE	0	0	0	0	0	0	0	0	0	0	656.055	188.607	262.422	96.1877	673.782	113548	27016.7	45419.2	42374.6	248658	105347	18032.4	21282.1	30216.1	42138.9	153.018	61.4959	3485.55	49658.6	15937	371652	43884.4	0	0	0	0	0	4.96692	677.678	564.732	6.89472	22.9373	13.1303	4.88889	1.00457	0
13	Amazonas	1975	NORTE	0	0	0	0	0	0	0	0	0	0	143.327	41.2045	57.3306	21.0139	147.199	24806.5	5902.27	9922.61	9257.45	54323.6	23014.9	3939.49	4649.43	6601.23	9205.98	398.862	160.297	9085.58	129442	41541.9	968763	114391	108.64	117.718	9668.96	26601.1	5187.56	13.659	1863.62	1553.01	8.89504	29.5919	16.9397	6.30727	1.29602	0
14	Roraima	1975	NORTE	0	0	0	0	0	0	0	0	0	0	178.996	51.459	71.5983	26.2435	183.832	30980.1	7371.15	12392	11561.3	67842.9	28742.6	4919.9	5806.52	8244.06	11497	32.3852	13.0152	737.693	10509.9	3372.95	78657.7	9287.83	0	0	0	0	0	0.27594	37.6488	31.374	0.13552	0.450846	0.258084	0.0960942	0.0197454	0
15	Pará	1975	NORTE	0	22.3755	2.08003	0.61283	723.12	1286.29	611.01	95.4408	680.8	649.129	8695.65	2499.89	3478.26	1274.92	8930.62	1.50502e+06	358092	602007	561652	3.29582e+06	1.39632e+06	239010	282082	400498	558529	770.168	309.52	17543.4	249941	80213.7	1.8706e+06	220878	337.172	365.345	30008.3	82558.5	16100	47.0478	6419.12	5349.27	185.474	617.033	353.217	131.516	27.0238	0
16	Amapá	1975	NORTE	0	0	0	0	0	0	0	0	0	0	37.8493	10.8812	15.1397	5.54929	38.8721	6550.85	1558.66	2620.34	2444.69	14345.6	6077.73	1040.33	1227.81	1743.24	2431.09	83.6687	33.6253	1905.87	27152.8	8714.17	203216	23995.5	0.388	0.42042	34.532	95.004	18.527	0.96579	131.771	109.809	0.82992	2.76097	1.5805	0.588478	0.12092	0
17	Tocantins	1975	NORTE	0	0	0	0	0	0	0	0	0	0	0	0	0	0	0	0	0	0	0	0	0	0	0	0	0	0	0	0	0	0	0	0	0	0	0	0	0	0	0	0	0	0	0	0	0	0
21	Maranhão	1975	NORDESTE	0	127.93	11.8924	3.50379	4134.36	7354.24	3493.38	545.672	3892.4	3711.33	41474.9	11923.5	16590	6080.86	42595.6	7.17836e+06	1.70796e+06	2.87134e+06	2.67886e+06	1.57198e+07	6.65992e+06	1.13998e+06	1.34542e+06	1.91022e+06	2.66397e+06	610.323	245.281	13902.4	198067	63565.8	1.48236e+06	175036	2.91	3.15315	258.99	712.53	138.952	11.3135	1543.6	1286.33	78.7629	262.027	149.996	55.849	11.4758	0
22	Piauí	1975	NORDESTE	0	546.255	50.78	14.9611	17653.6	31402.3	14916.6	2330	16620.4	15847.2	6193.56	1780.57	2477.43	908.071	6360.92	1.07196e+06	255055	428785	400042	2.34748e+06	994543	170237	200916	285259	397817	189.649	76.2174	4319.96	61546.5	19752.1	460623	54389.9	0	0	0	0	0	1.65564	225.893	188.244	220.732	734.328	420.362	156.516	32.1608	0
23	Ceará	1975	NORDESTE	0	9206.31	855.821	252.146	297525	529240	251397	39268.7	280112	267081	3519.48	1011.8	1407.79	516.009	3614.58	609141	144934	243656	227323	1.33395e+06	565147	96736.7	114170	162098	226059	1817.23	730.322	41394.3	589744	189267	4.41373e+06	521169	0.582	0.63063	51.798	142.506	27.7905	536.979	73264.6	61053.8	1268.97	4221.6	2416.63	899.801	184.891	0
24	Rio Grande do Norte	1975	NORDESTE	0	5305.92	493.239	145.321	171474	305019	144889	22631.9	161438	153928	403.17	115.906	161.268	59.1108	414.064	69779.4	16602.8	27911.8	26040.7	152809	64739.8	11081.6	13078.6	18568.9	25895.9	126.96	51.0235	2891.99	41202.1	13223	308362	36411.1	0	0	0	0	0	0.41391	56.4732	47.061	634.452	2110.69	1208.25	449.876	92.4402	0
25	Paraíba	1975	NORDESTE	0	5984.72	556.341	163.912	193411	344042	163425	25527.3	182092	173621	998.694	287.112	399.478	146.424	1025.68	172851	41126.8	69140.3	64505.6	378525	160367	27450.2	32397	45997.1	64146.9	483.946	194.492	11023.7	157054	50403.5	1.17542e+06	138792	0	0	0	0	0	29.8015	4066.07	3388.39	2127.12	7076.48	4050.89	1508.3	309.924	0
26	Pernambuco	1975	NORDESTE	0	2723.73	253.199	74.5988	88024.1	156578	74377.2	11617.8	82872.6	79017.4	520.011	149.496	208.004	76.2415	534.062	90001.9	21414.4	36000.8	33587.5	197094	83501.8	14293.1	16868.9	23950.3	33400.7	1613.27	648.35	36748.1	523550	168023	3.91832e+06	462672	0.776	0.84084	69.064	190.008	37.054	1196.61	163264	136053	15862.8	52772.1	30209.1	11248	2311.22	0
27	Alagoas	1975	NORDESTE	0	2067.55	192.2	56.6269	66817.9	118856	56458.7	8818.94	62907.4	59981	710.093	204.142	284.037	104.11	729.28	122901	29242	49160.3	45864.8	269139	114024	19517.7	23035	32704.9	45609.8	442.82	177.963	10086.9	143707	46120.1	1.07553e+06	126997	0	0	0	0	0	16.5564	2258.93	1882.44	12941.3	43052.9	24645.4	9176.37	1885.56	0
28	Sergipe	1975	NORDESTE	0	454.564	42.2563	12.4498	14690.3	26131.3	12412.8	1938.9	13830.6	13187.2	1024.39	294.499	409.756	150.191	1052.07	177298	42185	70919.4	66165.3	388264	164493	28156.5	33230.6	47180.6	65797.4	89.2466	35.867	2032.92	28963	9295.11	216764	25595.2	0	0	0	0	0	4.41504	602.381	501.984	851.061	2831.3	1620.76	603.468	124	0
29	Bahia	1975	NORDESTE	0	5549.37	515.871	151.989	179342	319015	151537	23670.4	168846	160991	1000.83	287.725	400.331	146.737	1027.87	173220	41214.7	69288.1	64643.4	379333	160710	27508.8	32466.3	46095.4	64283.9	2422.15	973.428	55173.4	786055	252269	5.88295e+06	694653	56258.6	60959.4	5.00702e+06	1.37752e+07	2.68635e+06	2297.61	313483	261236	867.552	2886.16	1652.17	615.162	126.403	0
31	Minas Gerais	1975	SUDESTE	0	13280.4	1234.55	363.728	429187	763443	362648	56646.2	404070	385272	26150.8	7518.03	10460.3	3834.11	26857.5	4.52611e+06	1.07691e+06	1.81044e+06	1.68908e+06	9.91168e+06	4.19922e+06	718784	848318	1.20444e+06	1.67969e+06	1597.7	642.093	36393.5	518498	166402	3.88051e+06	458207	1.94	2.1021	172.66	475.02	92.635	40402.7	5.51248e+06	4.59373e+06	4183.83	13918.7	7967.68	2966.66	609.587	0
32	Espírito Santo	1975	SUDESTE	0	102.392	9.51842	2.80437	3309.06	5886.19	2796.04	436.745	3115.4	2970.47	1738.38	499.762	695.352	254.873	1785.35	300873	71587.5	120349	112282	658880	279144	47781.3	56392	80065	111657	1251.53	502.975	28508.3	406158	130348	3.03974e+06	358930	1837.57	1991.11	163544	449939	87743.9	14967.5	2.04215e+06	1.70179e+06	559.6	1861.67	1065.7	396.8	81.5342	0
33	Rio de Janeiro	1975	SUDESTE	0	34.2929	3.18788	0.939229	1108.26	1971.38	936.439	146.273	1043.4	994.861	3098.27	890.711	1239.31	454.253	3181.98	536238	127588	214495	200117	1.1743e+06	497510	85159.2	100506	142698	199004	1991.81	800.484	45371	646400	207449	4.83775e+06	571237	0.582	0.63063	51.798	142.506	27.7905	543.464	74149.3	61791.1	7413.72	24663.8	14118.7	5256.9	1080.18	0
35	São Paulo	1975	SUDESTE	0	96004.6	8924.61	2629.42	3.10262e+06	5.51898e+06	2.6216e+06	409499	2.92105e+06	2.78516e+06	24302.9	6986.78	9721.18	3563.18	24959.6	4.20628e+06	1.00081e+06	1.68251e+06	1.56973e+06	9.21129e+06	3.90249e+06	667993	788373	1.11933e+06	1.561e+06	2862.72	1150.49	65209.1	929033	298155	6.95301e+06	821006	2.716	2.94294	241.724	665.028	129.689	117237	1.59956e+07	1.33297e+07	38713.8	128793	73726.6	27451.1	5640.64	0
41	Paraná	1975	SUL	0	66378.2	6170.53	1817.99	2.14517e+06	3.81586e+06	1.81259e+06	283130	2.01963e+06	1.92568e+06	32075.8	9221.39	12830.3	4702.81	32942.5	5.55159e+06	1.3209e+06	2.22063e+06	2.07178e+06	1.21574e+07	5.15064e+06	881639	1.04052e+06	1.47733e+06	2.06026e+06	294.63	118.408	6711.3	95615.9	30686	715603	84497.7	0	0	0	0	0	164876	2.24954e+07	1.87462e+07	1892.28	6295.2	3603.65	1341.77	275.707	0
42	Santa Catarina	1975	SUL	0	0	0	0	0	0	0	0	0	0	9631.82	2769.02	3852.73	1412.17	9892.08	1.66705e+06	396644	666819	622119	3.65065e+06	1.54665e+06	264741	312451	443616	618659	1039.99	417.958	23689.6	337506	108316	2.52594e+06	298261	0	0	0	0	0	126.381	17243.2	14369.3	562.344	1870.8	1070.93	398.746	81.934	0
43	Rio Grande do Sul	1975	SUL	0	0.243212	0.0226091	0.0066612	7.86	13.9815	6.64141	1.0374	7.4	7.05576	87026.4	25019	34810.5	12759.4	89377.9	1.50623e+07	3.5838e+06	6.0249e+06	5.62103e+06	3.29847e+07	1.39744e+07	2.39201e+06	2.82308e+06	4.0082e+06	5.58977e+06	435.077	174.852	9910.5	141195	45313.7	1.05672e+06	124777	0	0	0	0	0	3.72519	508.259	423.549	697.893	2321.74	1329.07	494.861	101.684	0
50	Mato Grosso do Sul	1975	CENTRO-OESTE	0	7731.72	718.742	211.76	249869	444470	211131	32978.9	235246	224302	27155	7806.71	10862	3981.34	27888.8	4.6999e+06	1.11826e+06	1.87996e+06	1.75394e+06	1.02923e+07	4.36047e+06	746385	880893	1.25069e+06	1.74419e+06	133.703	53.7336	3045.59	43390.5	13925.3	324741	38345.1	0	0	0	0	0	1821.2	248482	207068	11.7298	39.0224	22.3382	8.31731	1.70904	0
51	Mato Grosso	1975	CENTRO-OESTE	0	647.188	60.1627	17.7255	20915.5	37204.6	17672.8	2760.52	19691.4	18775.4	16498.4	4743.07	6599.35	2418.91	16944.2	2.85549e+06	679412	1.14219e+06	1.06563e+06	6.25321e+06	2.64926e+06	453476	535198	759870	1.0597e+06	244.013	98.0655	5558.3	79189.1	25414.2	592662	69981	0	0	0	0	0	430.328	58713.3	48927.8	79.585	264.762	151.562	56.4319	11.5956	0
52	Goiás	1975	CENTRO-OESTE	0	11462.6	1065.57	313.942	370442	658946	313010	48892.7	348762	332538	51036.1	14672.2	20414.5	7482.67	52415.2	8.83318e+06	2.1017e+06	3.53327e+06	3.29642e+06	1.93437e+07	8.19522e+06	1.40278e+06	1.65558e+06	2.35058e+06	3.27809e+06	1131.4	454.695	25771.9	367171	117836	2.74796e+06	324477	0.582	0.63063	51.798	142.506	27.7905	515.456	70328	58606.6	379.331	1261.95	722.397	268.975	55.2688	0
53	Distrito Federal	1975	CENTRO-OESTE	0	0	0	0	0	0	0	0	0	0	53.2024	15.295	21.281	7.80029	54.64	9208.12	2190.91	3683.25	3436.34	20164.8	8543.09	1462.33	1725.86	2450.36	3417.23	50.451	20.2756	1149.21	16372.8	5254.51	122536	14469	0	0	0	0	0	3.17331	432.961	360.801	3.8192	12.7057	7.27328	2.70811	0.556461	0
11	Rondônia	1985	NORTE	0	72.9637	6.78272	1.99836	2358	4194.44	1992.42	311.22	2220	2116.73	10432.6	2999.22	4173.02	1529.57	10714.4	1.80563e+06	429618	722253	673838	3.95414e+06	1.67523e+06	286750	338426	480495	670091	207.715	83.4778	4731.48	67409.3	21633.7	504501	59571	1903.92	2063	169449	466185	90912	8961.98	1.22276e+06	1.01896e+06	5.02432	16.7148	9.56832	3.56263	0.732048	0
12	Acre	1985	NORTE	0	0.243212	0.0226091	0.0066612	7.86	13.9815	6.64141	1.0374	7.4	7.05576	894.005	257.015	357.602	131.075	918.162	154732	36815.7	61892.7	57743.7	338845	143557	24572.7	29001	41175.4	57422.6	201.221	80.8681	4583.56	65301.9	20957.4	488729	57708.7	16.49	17.8679	1467.61	4037.67	787.398	57.6715	7868.6	6557.17	2.23104	7.42219	4.24879	1.58198	0.325065	0
13	Amazonas	1985	NORTE	0	2.91855	0.271309	0.0799344	94.32	167.777	79.697	12.4488	88.8	84.6691	333.362	95.8372	133.345	48.8759	342.37	57697.2	13728	23078.9	21531.8	126351	53530.2	9162.81	10814.1	15353.7	21412.1	1236.05	496.752	28155.6	401133	128736	3.00213e+06	354489	416.712	451.531	37087.4	102034	19898	48.4275	6607.36	5506.14	7.90832	26.3093	15.0606	5.60761	1.15225	0
14	Roraima	1985	NORTE	0	0	0	0	0	0	0	0	0	0	1054.17	303.06	421.668	154.557	1082.65	182452	43411.3	72980.9	68088.7	399551	169275	28975	34196.6	48552.2	67710.1	54.0308	21.7143	1230.75	17534.5	5627.36	131231	15495.6	0.582	0.63063	51.798	142.506	27.7905	2.34549	320.015	266.679	0.71344	2.37346	1.35868	0.505884	0.103949	0
15	Pará	1985	NORTE	0	803.816	74.723	22.0153	25977.3	46208.7	21949.9	3428.61	24457	23319.3	14541.6	4180.51	5816.63	2132.02	14934.5	2.51681e+06	598830	1.00672e+06	939239	5.51154e+06	2.33504e+06	399691	471720	669745	934016	1256.28	504.882	28616.4	407698	130843	3.05127e+06	360291	4331.83	4693.78	385533	1.06067e+06	206845	461.51	62967.6	52473	158.798	528.287	302.415	112.6	23.137	0
16	Amapá	1985	NORTE	0	0	0	0	0	0	0	0	0	0	17.0229	4.89387	6.80917	2.49582	17.4829	2946.28	701.014	1178.51	1099.51	6452.02	2733.49	467.894	552.214	784.03	1093.4	39.0454	15.6918	889.404	12671.3	4066.61	94834.1	11197.9	2.91	3.15315	258.99	712.53	138.952	1.79361	244.717	203.931	1.64304	5.46604	3.12901	1.16504	0.239392	0
17	Tocantins	1985	NORTE	0	53.5067	4.97399	1.46546	1729.2	3075.92	1461.11	228.228	1628	1552.27	18467.1	5309.05	7386.84	2707.56	18966.1	3.19623e+06	760486	1.27849e+06	1.19279e+06	6.99939e+06	2.96539e+06	507588	599062	850544	1.18616e+06	683.169	274.557	15561.7	221708	71152.7	1.65929e+06	195928	9.118	9.87987	811.502	2232.59	435.385	14.6248	1995.39	1662.82	138.812	461.797	264.353	98.4283	20.225	0
21	Maranhão	1985	NORDESTE	0	758.579	70.5177	20.7763	24515.3	43608.1	20714.6	3235.65	23080.6	22006.9	36148.1	10392.1	14459.2	5299.86	37124.8	6.2564e+06	1.4886e+06	2.50256e+06	2.3348e+06	1.37008e+07	5.80455e+06	993569	1.17262e+06	1.66488e+06	2.32182e+06	733.703	294.866	16712.8	238108	76415.9	1.78203e+06	210421	3.88	4.2042	345.32	950.04	185.27	16.9703	2315.4	1929.5	889.085	2957.8	1693.17	630.43	129.54	0
22	Piauí	1985	NORDESTE	0	3615.35	336.084	99.0187	116839	207834	98724.6	15421	110001	104884	7116.88	2046.01	2846.75	1043.44	7309.19	1.23177e+06	293077	492707	459679	2.69744e+06	1.14281e+06	195615	230868	327784	457123	110.143	44.265	2508.92	35744.5	11471.5	267517	31588.2	0	0	0	0	0	1.3797	188.244	156.87	350.888	1167.33	668.231	248.807	51.1247	0
23	Ceará	1985	NORDESTE	0	30048.9	2793.35	822.991	971103	1.72741e+06	820547	128171	914270	871739	4803.06	1380.82	1921.23	704.202	4932.85	831299	197793	332520	310230	1.82046e+06	771261	132017	155809	221216	308504	1405.97	565.039	32026.1	456276	146433	3.41483e+06	403221	0	0	0	0	0	524.838	71608	59673.3	1506.53	5011.89	2869.03	1068.24	219.502	0
24	Rio Grande do Norte	1985	NORDESTE	0	6485.98	602.939	177.641	209610	372857	177113	27665.4	197343	188163	478.219	137.482	191.288	70.1142	491.141	82768.7	19693.3	33107.5	30888.1	181254	76790.9	13144.4	15513.1	22025.5	30716.4	158.18	63.5703	3603.13	51333.7	16474.6	384189	45364.7	0	0	0	0	0	3.03534	414.137	345.114	2851.6	9486.65	5430.58	2022	415.48	0
25	Paraíba	1985	NORDESTE	0	8814.01	819.353	241.402	284846	506688	240685	37595.4	268176	255701	1251.16	359.693	500.465	183.439	1284.97	216547	51523.6	86618.9	80812.5	474215	200908	34389.6	40587	57625.1	80363.1	1277.18	513.28	29092.4	414479	133019	3.10202e+06	366284	0	0	0	0	0	18.6259	2541.29	2117.74	6246.66	20781.3	11896.1	4429.37	910.145	0
26	Pernambuco	1985	NORDESTE	0	3784.38	351.797	103.648	122302	217551	103340	16141.9	115144	109788	1301.86	374.268	520.744	190.872	1337.04	225322	53611.3	90128.8	84087	493430	209049	35783	42231.6	59960.1	83619.5	3095.57	1244.07	70513.2	1.0046e+06	322407	7.51858e+06	887787	0.97	1.05105	86.33	237.51	46.3175	1011.73	138039	115033	26615.7	88544.9	50687	18872.6	3877.94	0
27	Alagoas	1985	NORDESTE	0	6635.56	616.843	181.738	214444	381456	181198	28303.4	201894	192502	828.511	238.186	331.404	121.472	850.898	143396	34118.6	57358.5	53513.5	314022	133040	22772.5	26876.4	38159	53215.9	420.674	169.063	9582.43	136521	43813.6	1.02174e+06	120646	0.194	0.21021	17.266	47.502	9.2635	12.2793	1675.37	1396.14	27824.4	92565.9	52988.8	19729.7	4054.04	0
28	Sergipe	1985	NORDESTE	0	2222.47	206.602	60.87	71824.7	127762	60689.2	9479.76	67621.2	64475.5	1058.3	304.247	423.319	155.162	1086.89	183167	43581.3	73266.7	68355.4	401115	169938	29088.5	34330.6	48742.3	67975.3	132.371	53.1983	3015.25	42958.2	13786.6	321506	37963.1	0	0	0	0	0	1.93158	263.542	219.618	1580.66	5258.52	3010.21	1120.81	230.304	0
29	Bahia	1985	NORDESTE	0	34867.9	3241.33	954.976	1.12684e+06	2.00444e+06	952140	148726	1.06089e+06	1.01154e+06	2780.91	799.475	1112.36	407.723	2856.05	481311	114519	192524	179619	1.05402e+06	446549	76436.3	90211	128081	178620	3030.3	1217.84	69026.5	983419	315609	7.36005e+06	869068	82443.4	89332.1	7.33746e+06	2.01867e+07	3.93667e+06	14636.8	1.99702e+06	1.66419e+06	2273.45	7563.28	4329.56	1612.05	331.244	0
31	Minas Gerais	1985	SUDESTE	0	38088.2	3540.69	1043.18	1.23092e+06	2.18956e+06	1.04008e+06	162462	1158877	1.10497e+06	30101.2	8653.7	12040.5	4413.29	30914.5	5.20982e+06	1.23958e+06	2.08393e+06	1.94423e+06	1.14089e+07	4.83355e+06	827364	976465	1.38638e+06	1.93342e+06	2139.17	859.704	48727.6	694221	222797	5.19565e+06	613498	2.716	2.94294	241.724	665.028	129.689	185227	2.52721e+07	2.106e+07	12568.8	41813.6	23936	8912.24	1831.28	0
32	Espírito Santo	1985	SUDESTE	0	8.26921	0.768708	0.226481	267.24	475.369	225.808	35.2716	251.6	239.896	3150.22	905.646	1260.09	461.87	3235.34	545230	129728	218092	203472	1.19399e+06	505852	86587.1	102191	145090	202341	1937.53	778.669	44134.5	628784	201796	4.70591e+06	555670	2348.18	2544.38	208988	574964	112125	66065.8	9.01391e+06	7.51159e+06	2699.92	8982.06	5141.73	1914.45	393.381	0
33	Rio de Janeiro	1985	SUDESTE	0	0	0	0	0	0	0	0	0	0	3951.92	1136.12	1580.77	579.411	4058.7	683986	162742	273594	255254	1.49785e+06	634587	108623	128198	182015	253835	2335.9	938.766	53208.7	758064	243286	5.67346e+06	669917	0.776	0.84084	69.064	190.008	37.054	2384.4	325323	271103	8994.53	29922.9	17129.2	6377.82	1310.51	0
35	São Paulo	1985	SUDESTE	0	138880	12910.3	3803.69	4.48823e+06	7.98372e+06	3.79239e+06	592378	4.22556e+06	4.02899e+06	14800.9	4255.05	5920.34	2170.03	15200.8	2.56169e+06	609508	1.02467e+06	955986	5.60981e+06	2.37668e+06	406818	480131	681687	950670	3405.19	1368.5	77565.9	1.10508e+06	354654	8.27058e+06	976583	25.22	27.3273	2244.58	6175.26	1204.26	144672	1.97389e+07	1.6449e+07	140001	465753	266618	99271.5	20398.3	0
41	Paraná	1985	SUL	0	205923	19142.7	5639.92	6.65492e+06	1.18378e+07	5.62317e+06	878348	6.26545e+06	5.97398e+06	8663.84	2490.74	3465.53	1270.25	8897.94	1.49951e+06	356782	599804	559597	3.28376e+06	1.39121e+06	238135	281050	399033	556485	738.449	296.773	16820.9	239648	76910.1	1.79356e+06	211782	0	0	0	0	0	78530.6	1.07146e+07	8.92882e+06	11618.9	38653.5	22127	8238.67	1692.88	0
42	Santa Catarina	1985	SUL	0	3.8914	0.361745	0.106579	125.76	223.703	106.263	16.5984	118.4	112.892	15196.9	4368.92	6078.77	2228.1	15607.6	2.63024e+06	625818	1.0521e+06	981569	5.75993e+06	2.44028e+06	417704	492980	699929	976110	2186.29	878.642	49800.9	709513	227704	5.3101e+06	627012	0	0	0	0	0	81.6782	11144	9286.7	1016.76	3382.54	1936.31	720.961	148.143	0
43	Rio Grande do Sul	1985	SUL	0	0	0	0	0	0	0	0	0	0	164074	47169.2	65629.7	24055.8	168508	2.83975e+07	6.75667e+06	1.1359e+07	1.05975e+07	6.21873e+07	2.63465e+07	4.50976e+06	5.32247e+06	7.55681e+06	1.05386e+07	708.561	284.761	16140.1	229948	73797.3	1.72097e+06	203210	0	0	0	0	0	3.44925	470.61	392.175	1171.27	3896.57	2230.57	830.522	170.655	0
50	Mato Grosso do Sul	1985	CENTRO-OESTE	0	22005.6	2045.65	602.699	711165	1.26503e+06	600908	93862.9	669545	638398	10916.3	3138.31	4366.53	1600.5	11211.3	1.88937e+06	449541	755746	705085	4.1375e+06	1.75291e+06	300047	354120	502777	701165	145.941	58.6519	3324.36	47362.1	15199.9	354465	41854.9	0.194	0.21021	17.266	47.502	9.2635	875.282	119422	99518.3	2748.59	9143.97	5234.41	1948.96	400.472	0
51	Mato Grosso	1985	CENTRO-OESTE	0	2913.2	270.811	79.7879	94147.1	167470	79550.8	12426	88637.2	84513.8	28245.3	8120.16	11298.1	4141.19	29008.5	4.88861e+06	1.16316e+06	1.95544e+06	1.82436e+06	1.07055e+07	4.53554e+06	776353	916261	1.3009e+06	1.81422e+06	907.701	364.793	20676.3	294575	94537.9	2.20464e+06	260322	201.566	218.408	17939.4	49354.6	9624.78	4844.95	661038	550865	1216.7	4047.71	2317.09	862.736	177.275	0
52	Goiás	1985	CENTRO-OESTE	0	23835.3	2215.73	652.811	770296	1.37021e+06	650872	101667	725215	691478	35775.1	10284.9	14310	5245.17	36741.7	6.19184e+06	1.47324e+06	2.47673e+06	2.31071e+06	1.35594e+07	5.74465e+06	983316	1.16052e+06	1.6477e+06	2.29786e+06	779.908	313.435	17765.3	253102	81228.2	1.89425e+06	223672	0	0	0	0	0	1924.13	262525	218771	4971.96	16540.6	9468.59	3525.5	724.418	0
53	Distrito Federal	1985	CENTRO-OESTE	0	0.243212	0.0226091	0.0066612	7.86	13.9815	6.64141	1.0374	7.4	7.05576	436.845	125.587	174.738	64.0481	448.648	75607.7	17989.5	30243.1	28215.8	165573	70147.1	12007.1	14171	20119.9	28058.9	31.8024	12.781	724.419	10320.8	3312.25	77242.2	9120.69	0	0	0	0	0	101.96	13911.2	11592.7	5.4992	18.2947	10.4727	3.89936	0.801238	0
11	Rondônia	1995	NORTE	0	518.042	48.1573	14.1884	16741.8	29780.5	14146.2	2209.66	15762	15028.8	4065.84	1168.88	1626.33	596.113	4175.7	703702	167433	281481	262612	1.54103e+06	652879	111754	131893	187261	261152	176.162	70.7972	4012.75	57169.6	18347.4	427865	50522	699.176	757.597	62226.7	171197	33385.7	10888.3	1.48558e+06	1.23799e+06	25.7902	85.7986	49.1149	18.2873	3.75766	0
12	Acre	1995	NORTE	0	5.83709	0.542618	0.159869	188.64	335.555	159.394	24.8976	177.6	169.338	924.804	265.869	369.922	135.59	949.793	160062	38084	64024.9	59733.1	350519	148502	25419.3	30000.1	42594	59400.9	286.971	115.33	6536.84	93130.2	29888.3	697000	82301.1	3.104	3.36336	276.256	760.032	148.216	49.8072	6795.61	5663.01	3.18192	10.5856	6.05965	2.25623	0.463609	0
13	Amazonas	1995	NORTE	0	3.8914	0.361745	0.106579	125.76	223.703	106.263	16.5984	118.4	112.892	298.203	85.7294	119.281	43.7211	306.26	51612	12280.2	20644.8	19260.9	113025	47884.5	8196.43	9673.52	13734.4	19153.8	1408.55	566.077	32084.9	457113	146702	3.4211e+06	403961	191.672	207.687	17058.8	46932	9152.34	38.2177	5214.36	4345.3	9.57264	31.8461	18.2301	6.78775	1.39474	0
14	Roraima	1995	NORTE	0	3.64818	0.339136	0.099918	117.9	209.722	99.6212	15.561	111	105.836	1415.64	406.978	566.256	207.554	1453.89	245015	58296.9	98005.8	91436.1	536555	227319	38910.4	45922.5	65200.5	90927.6	163.591	65.745	3726.39	53089.9	17038.2	397332	46916.7	1.164	1.26126	103.596	285.012	55.581	4.96692	677.678	564.732	0.65072	2.16481	1.23923	0.461411	0.0948105	0
15	Pará	1995	NORTE	0	249.536	23.1969	6.83439	8064.36	14345	6814.09	1064.37	7592.4	7239.2	9163.9	2634.5	3665.56	1343.57	9411.52	1.58606e+06	377375	634424	591896	3.4733e+06	1.47151e+06	251880	297272	422064	588604	881.976	354.454	20090.3	286226	91858.6	2.14216e+06	252944	2921.83	3165.97	260043	715428	139518	885.078	120759	100632	62.2653	207.143	118.578	44.1509	9.07211	0
16	Amapá	1995	NORTE	0	0	0	0	0	0	0	0	0	0	25.4184	7.30747	10.1674	3.72673	26.1053	4399.34	1046.75	1759.74	1641.78	9634.08	4081.61	698.653	824.559	1170.7	1632.65	34.3	13.7847	781.31	11131.3	3572.38	83308.4	9836.98	4.656	5.04504	414.384	1140.05	222.324	2.7594	376.488	313.74	2.76976	9.2144	5.27473	1.96397	0.403557	0
17	Tocantins	1995	NORTE	0	48.8857	4.54442	1.3389	1579.86	2810.27	1334.92	208.517	1487.4	1418.21	12114.8	3482.84	4845.9	1776.21	12442.1	2.09679e+06	498893	838714	782492	4.59173e+06	1.94535e+06	332987	392996	557973	778140	291.883	117.304	6648.72	94724.3	30399.9	708930	83709.8	6.014	6.51651	535.246	1472.56	287.169	1.3797	188.244	156.87	100.456	334.196	191.309	71.2312	14.6366	0
21	Maranhão	1995	NORDESTE	0	456.023	42.392	12.4898	14737.5	26215.2	12452.6	1945.13	13875	13229.5	26033.3	7484.22	10413.3	3816.87	26736.7	4.50576e+06	1.07206e+06	1.8023e+06	1.68149e+06	9.86711e+06	4.18034e+06	715552	844504	1.19902e+06	1.67214e+06	807.465	324.51	18393	262045	84098.2	1.96118e+06	231575	0.388	0.42042	34.532	95.004	18.527	7.45038	1016.52	847.098	928.77	3089.82	1768.75	658.57	135.323	0
22	Piauí	1995	NORDESTE	0	1320.89	122.79	36.177	42687.7	75933.3	36069.5	5634.12	40189.4	38319.8	7452.89	2142.61	2981.16	1092.71	7654.27	1.28992e+06	306914	515969	481382	2.82479e+06	1.19676e+06	204851	241767	343260	478705	149.771	60.191	3411.59	48605	15598.8	363766	42953.2	0	0	0	0	0	0.82782	112.946	94.122	562.732	1872.09	1071.67	399.02	81.9905	0
23	Ceará	1995	NORDESTE	0	1379.26	128.216	37.7757	44574.1	79288.8	37663.5	5883.1	41965.4	40013.2	5174.09	1487.48	2069.64	758.6	5313.9	895515	213072	358206	334194	1.96108e+06	830839	142215	167844	238304	332336	2317.75	931.472	52795.3	752174	241396	5.62938e+06	664712	0	0	0	0	0	390.869	53329.5	44441.3	1152.81	3835.16	2195.41	817.433	167.966	0
24	Rio Grande do Norte	1995	NORDESTE	0	1551.21	144.201	42.4851	50131.1	89173.7	42358.9	6616.54	47197.2	45001.6	323.204	92.9169	129.281	47.3866	331.937	55939.1	13309.7	22375.6	20875.7	122501	51899.1	8883.61	10484.5	14885.9	20759.6	180.325	72.4701	4107.57	58520.5	18781	437976	51715.8	0	0	0	0	0	2.48346	338.839	282.366	3565.56	11861.8	6790.25	2528.26	519.505	0
25	Paraíba	1995	NORDESTE	0	2070.47	192.471	56.7068	66912.2	119024	56538.4	8831.39	62996.2	60065.6	933.803	268.456	373.521	136.91	959.035	161620	38454.5	64647.9	60314.3	353930	149947	25666.6	30292	43008.4	59978.9	1017.51	408.924	23177.6	330211	105975	2.47135e+06	291814	0	0	0	0	0	8.55414	1167.11	972.594	9780.12	32536.3	18625.3	6934.86	1424.97	0
26	Pernambuco	1995	NORDESTE	0	359.711	33.4388	9.85191	11624.9	20678.6	9822.65	1534.31	10944.6	10435.5	596.916	171.606	238.766	87.5169	613.045	103312	24581.3	41324.9	38554.8	226243	95850.9	16406.9	19363.6	27492.3	38340.4	2740.17	1101.24	62417.6	889263	285391	6.65537e+06	785860	1.746	1.89189	155.394	427.518	83.3715	732.483	99938.7	83282.3	17157.6	57079.7	32675	12166.1	2499.88	0
27	Alagoas	1995	NORDESTE	0	661.78	61.5193	18.1251	21387.1	38043.5	18071.3	2822.77	20135.4	19198.7	439.628	126.387	175.851	64.4561	451.507	76089.4	18104.1	30435.8	28395.5	166627	70594	12083.6	14261.3	20248	28237.6	342.5	137.646	7801.72	111151	35671.7	831871	98226.5	0	0	0	0	0	5.79474	790.625	658.854	23011.3	76553.6	43822.7	16316.8	3352.76	0
28	Sergipe	1995	NORDESTE	0	89.7453	8.34275	2.45798	2900.34	5159.16	2450.68	382.801	2730.6	2603.57	256.921	73.8615	102.768	37.6685	263.863	44467.1	10580.2	17786.8	16594.5	97378.1	41255.6	7061.75	8334.37	11833.1	16502.2	185.153	74.4107	4217.56	60087.5	19283.9	449703	53100.6	0	0	0	0	0	4.00113	545.908	454.923	739.557	2460.35	1408.41	524.404	107.754	0
29	Bahia	1995	NORDESTE	0	10646.1	989.667	291.581	344056	612010	290715	45410.1	323920	308852	2719.91	781.939	1087.96	398.78	2793.41	470754	112008	188302	175679	1.0309e+06	436755	74759.7	88232.3	125272	174702	1397.81	561.76	31840.3	453628	145583	3.39502e+06	400881	41804.9	45297.9	3.72063e+06	1.02362e+07	1.99618e+06	13188.1	1.79937e+06	1.49947e+06	1661.15	5526.31	3163.5	1177.89	242.032	0
31	Minas Gerais	1995	SUDESTE	0	11352.7	1055.35	310.931	366889	652626	310008	48423.8	345417	329349	7754.62	2229.35	3101.85	1136.94	7964.15	1.34215e+06	319340	536858	500870	2.93915e+06	1.24521e+06	213144	251555	357156	498085	2117.86	851.139	48242.1	687305	220577	5.14389e+06	607386	9.7	10.5105	863.3	2375.1	463.175	207879	2.83627e+07	2.36356e+07	13230.5	44014.9	25196.1	9381.43	1927.69	0
32	Espírito Santo	1995	SUDESTE	0	0.486424	0.0452181	0.0133224	15.72	27.9629	13.2828	2.0748	14.8	14.1115	786.162	226.012	314.465	115.263	807.405	136067	32374.6	54426.6	50778.2	297971	126240	21608.5	25502.7	36208.5	50495.8	1126.74	452.821	25665.7	365658	117351	2.73664e+06	323140	1196.01	1295.94	106445	292850	57109.5	91850.4	1.25319e+07	1.04433e+07	1996.85	6643.09	3802.8	1415.92	290.943	0
33	Rio de Janeiro	1995	SUDESTE	0	5.10746	0.47479	0.139885	165.06	293.61	139.47	21.7854	155.4	148.171	800.124	230.025	320.05	117.31	821.744	138483	32949.6	55393.2	51680	303263	128481	21992.3	25955.6	36851.5	51392.6	668.434	268.635	15226.1	216926	69618	1.6235e+06	191702	0	0	0	0	0	1296.23	176855	147379	6395.01	21274.8	12178.7	4534.56	931.758	0
35	São Paulo	1995	SUDESTE	0	36719.9	3413.49	1005.7	1.18669e+06	2.11091e+06	1.00271e+06	156626	1.11724e+06	1.06527e+06	2684.29	771.698	1073.72	393.558	2756.82	464588	110541	185835	173378	1.0174e+06	431035	73780.6	87076.8	123631	172414	3210.38	1290.21	73128.4	1.04186e+06	334364	7.79742e+06	920712	29.1	31.5315	2589.9	7125.3	1389.53	47039.2	6.41795e+06	5.34829e+06	172220	572940	327976	122118	25092.6	0
41	Paraná	1995	SUL	0	65045.4	6046.64	1781.49	2.1021e+06	3.73924e+06	1.7762e+06	277445	1.97908e+06	1.88701e+06	6589.59	1894.42	2635.84	966.134	6767.65	1.14051e+06	271363	456202	425621	2.49758e+06	1.05814e+06	181122	213762	303499	423254	545.553	219.251	12427	177047	56819.9	1.32505e+06	156460	6.596	7.14714	587.044	1615.07	314.959	15103.9	2.06074e+06	1.71729e+06	20655.4	68716.1	39336.1	14646.3	3009.51	0
42	Santa Catarina	1995	SUL	0	0	0	0	0	0	0	0	0	0	23073.9	6633.44	9229.54	3382.98	23697.3	3.99355e+06	950195	1.59742e+06	1.49034e+06	8.74544e+06	3.70513e+06	634210	748503	1.06272e+06	1.48205e+06	2064.49	829.692	47026.5	669986	215019	5.01427e+06	592081	0	0	0	0	0	35.3203	4819.05	4015.87	580.377	1930.79	1105.27	411.533	84.5615	0
43	Rio Grande do Sul	1995	SUL	0	3.64818	0.339136	0.099918	117.9	209.722	99.6212	15.561	111	105.836	215474	61945.9	86189.5	31591.7	221296	3.72935e+07	8.87333e+06	1.49174e+07	1.39174e+07	8.16687e+07	3.46001e+07	5.92253e+06	6.98984e+06	9.92413e+06	1.384e+07	608.492	244.545	13860.7	197473	63375	1.47791e+06	174511	0.194	0.21021	17.266	47.502	9.2635	2.06955	282.366	235.305	1385.76	4610.12	2639.04	982.61	201.906	0
50	Mato Grosso do Sul	1995	CENTRO-OESTE	0	18656.6	1734.32	510.974	602933	1.0725e+06	509456	79577.9	567647	541240	7532.48	2165.49	3012.99	1104.38	7736.02	1.3037e+06	310192	521480	486523	2.85496e+06	1.20954e+06	207039	244349	346926	483817	125.961	50.622	2869.23	40877.9	13118.9	305936	36124.6	0.582	0.63063	51.798	142.506	27.7905	163.908	22363.4	18636.2	5779.57	19227.4	11006.6	4098.16	842.089	0
51	Mato Grosso	1995	CENTRO-OESTE	0	11314.5	1051.8	309.886	365655	650431	308965	48260.9	344255	328241	27288.8	7845.18	10915.5	4000.96	28026.2	4.72307e+06	1.12377e+06	1.88923e+06	1.76258e+06	1.0343e+07	4.38195e+06	750063	885233	1.25685e+06	1.75278e+06	754.766	303.331	17192.6	244943	78609.6	1.83319e+06	216461	89.822	97.3272	7994.16	21993.4	4289	1275.95	174088	145073	9284.12	30886.3	17680.7	6583.16	1352.71	0
52	Goiás	1995	CENTRO-OESTE	0	35559.1	3305.58	973.907	1.14918e+06	2.04417e+06	971014	151674	1.08192e+06	1.03159e+06	9328.61	2681.85	3731.44	1367.72	9580.68	1.61457e+06	384158	645827	602534	3.53573e+06	1.49796e+06	256407	302615	429650	599184	818.704	329.026	18649	265693	85268.8	1.98848e+06	234798	0	0	0	0	0	501.521	68426.7	57022.2	7458.11	24811.5	14203.2	5288.38	1086.65	0
53	Distrito Federal	1995	CENTRO-OESTE	0	0	0	0	0	0	0	0	0	0	24.1197	6.9341	9.64787	3.53631	24.7714	4174.56	993.262	1669.82	1557.89	9141.83	3873.06	662.956	782.428	1110.89	1549.23	8.65825	3.47964	197.224	2809.85	901.765	21029.3	2483.12	0	0	0	0	0	220.752	30119	25099.2	7.43568	24.7369	14.1605	5.27247	1.08339	0
11	Rondônia	2006	NORTE	0	0	0	0	0	0	0	0	0	0	4349.15	1250.32	1739.66	637.651	4466.67	752737	179100	301095	280911	1.64841e+06	698373	119541	141084	200310	279349	66.7407	26.8222	1520.27	21659.2	6951.1	162101	19140.7	1154.69	1251.17	102767	282732	55136.4	10801	1.47367e+06	1.22806e+06	36.2432	120.573	69.0216	25.6992	5.28067	0
12	Acre	2006	NORTE	0	0	0	0	0	0	0	0	0	0	2804.84	806.355	1121.94	411.232	2880.63	485453	115505	194181	181164	1.06309e+06	450393	77094.1	90987.4	129183	180157	190.452	76.5402	4338.26	61807.1	19835.8	462573	54620.2	0	0	0	0	0	137.004	18692.6	15577.2	1.62736	5.41388	3.09914	1.15392	0.237108	0
13	Amazonas	2006	NORTE	0	0	0	0	0	0	0	0	0	0	302.145	86.8629	120.858	44.2991	310.31	52294.4	12442.5	20917.8	19515.6	114519	48517.6	8304.8	9801.42	13916	19407	316.269	127.104	7204.21	102638	32939.7	768160	90703.7	256.274	277.687	22808.4	62750.1	12237.1	61.2587	8358.03	6965.03	37.9277	126.177	72.2295	26.8937	5.5261	0
14	Roraima	2006	NORTE	0	0	0	0	0	0	0	0	0	0	3355.14	964.559	1342.06	491.915	3445.8	580697	138167	232279	216708	1.27166e+06	538758	92219.7	108839	154529	215503	109.485	44.0006	2493.93	35531	11403	265919	31399.5	0	0	0	0	0	3.31128	451.786	376.488	0.37856	1.25939	0.72093	0.268428	0.0551565	0
15	Pará	2006	NORTE	0	0	0	0	0	0	0	0	0	0	12232.4	3516.65	4892.96	1793.45	12562.9	2.11714e+06	503737	846858	790089	4.63631e+06	1.96424e+06	336221	396812	563390	785696	308.026	123.791	7016.43	99963.1	32081.2	748138	88339.5	5594.96	6062.46	497951	1.36996e+06	267159	244.207	33319.2	27766	25.359	84.3641	48.2938	17.9815	3.69483	0
16	Amapá	2006	NORTE	0	0	0	0	0	0	0	0	0	0	39.5656	11.3746	15.8262	5.80091	40.6346	6847.88	1629.33	2739.15	2555.54	14996.1	6353.31	1087.5	1283.48	1822.28	2541.33	4.61153	1.85331	105.045	1496.57	480.295	11200.6	1322.55	0.582	0.63063	51.798	142.506	27.7905	0.13797	18.8244	15.687	2.07088	6.88937	3.94378	1.46841	0.301729	0
17	Tocantins	2006	NORTE	0	0	0	0	0	0	0	0	0	0	10578.8	3041.27	4231.52	1551.01	10864.6	1.83095e+06	435641	732378	683284	4.00957e+06	1.69871e+06	290770	343170	487231	679484	128.805	51.7648	2934	41800.7	13415.1	312843	36940.2	0	0	0	0	0	0	0	0	189.289	629.724	360.482	134.221	27.5796	0
21	Maranhão	2006	NORDESTE	0	22742.3	2114.13	622.875	734973	1.30738e+06	621025	97005.2	691959	659770	50684.4	14571.1	20273.7	7431.1	52053.9	8.77229e+06	2.08721e+06	3.50892e+06	3.2737e+06	1.92104e+07	8.13874e+06	1.39311e+06	1.64417e+06	2.33438e+06	3.2555e+06	515.267	207.079	11737.1	167219	53665.6	1.25149e+06	147775	0	0	0	0	0	0.41391	56.4732	47.061	838.904	2790.85	1597.61	594.848	122.229	0
22	Piauí	2006	NORDESTE	0	50.5881	4.70269	1.38553	1634.88	2908.14	1381.41	215.779	1539.2	1467.6	13878.7	3989.96	5551.5	2034.83	14253.8	2.40209e+06	571535	960836	896427	5.26032e+06	2.22861e+06	381472	450218	639217	891442	345.049	138.67	7859.77	111978	35937.1	838060	98957.3	0	0	0	0	0	0.13797	18.8244	15.687	618.468	2057.51	1177.81	438.542	90.1114	0
23	Ceará	2006	NORDESTE	0	710.423	66.0411	19.4574	22959.1	40839.8	19399.6	3030.25	21615.4	20609.9	7798.91	2242.09	3119.57	1143.44	8009.65	1.34981e+06	321164	539925	503731	2.95594e+06	1.25233e+06	214362	252992	359197	500930	3972.67	1596.56	90492.3	1.28924e+06	413757	9.64888e+06	1.13933e+06	0	0	0	0	0	144.593	19728	16440	803.856	2674.26	1530.86	569.997	117.123	0
24	Rio Grande do Norte	2006	NORDESTE	0	588.087	54.6687	16.1068	19005.5	33807.1	16058.9	2508.43	17893.2	17060.8	554.15	159.311	221.66	81.2468	569.123	95910.5	22820.2	38364.2	35792.5	210034	88983.6	15231.4	17976.3	25522.6	35593.5	440.283	176.944	10029.1	142884	45855.9	1.06937e+06	126270	0	0	0	0	0	0.13797	18.8244	15.687	1665.55	5540.93	3171.88	1181.01	242.672	0
25	Paraíba	2006	NORDESTE	0	1079.13	100.316	29.5557	34874.8	62035.7	29468	4602.94	32833.8	31306.4	1471.11	422.927	588.446	215.688	1510.87	254616	60581.4	101846	95019.2	557581	236227	40435.2	47722.1	67755.5	94490.8	1351.24	543.047	30779.6	438517	140733	3.28192e+06	387526	0	0	0	0	0	1.24173	169.42	141.183	4023.7	13386	7662.74	2853.12	586.257	0
26	Pernambuco	2006	NORDESTE	0	45.4807	4.2279	1.24564	1469.82	2614.53	1241.94	193.994	1383.8	1319.43	610.738	175.579	244.295	89.5435	627.241	105705	25150.6	42281.9	39447.5	231482	98070.4	16786.8	19812	28128.9	39228.2	3926.44	1577.98	89439.2	1.27424e+06	408942	9.53659e+06	1.12607e+06	0	0	0	0	0	292.91	39964.2	33303.5	19208.7	63903.1	36581	13620.4	2798.72	0
27	Alagoas	2006	NORDESTE	0	161.25	14.9898	4.41638	5211.18	9269.7	4403.26	687.796	4906.2	4677.97	948.738	272.75	379.495	139.099	974.374	164205	39069.6	65681.9	61279	359590	152345	26077.1	30776.5	43696.3	60938.2	432.757	173.919	9857.66	140442	45072.1	1.05109e+06	124112	0	0	0	0	0	5.79474	790.625	658.854	38265.4	127301	72872.7	27133.2	5575.31	0
28	Sergipe	2006	NORDESTE	0	0	0	0	0	0	0	0	0	0	751.792	216.13	300.717	110.224	772.106	130118	30959.2	52047.1	48558.2	284944	120720	20663.8	24387.7	34625.5	48288.2	232.617	93.4857	5298.72	75490.8	24227.3	564984	66712.8	0	0	0	0	0	0	0	0	749.377	2493.02	1427.11	531.367	109.185	0
29	Bahia	2006	NORDESTE	0	161545	15017.2	4424.46	5.22071e+06	9.28666e+06	4.41131e+06	689055	4.91518e+06	4.68652e+06	996.746	286.552	398.698	146.138	1023.68	172514	41046.6	69005.5	64379.8	377786	160054	27396.6	32333.9	45907.4	64021.7	4103.01	1648.95	93461.4	1.33154e+06	427333	9.96547e+06	1.17671e+06	30177.3	32698.8	2.68578e+06	7.38908e+06	1.44097e+06	21003.7	2.86571e+06	2.38809e+06	3196.72	10634.8	6087.82	2266.72	465.764	0
31	Minas Gerais	2006	SUDESTE	0	7027.86	653.312	192.482	227123	404008	191910	29976.7	213830	203883	5841.32	1679.3	2336.53	856.427	5999.16	1.011e+06	240549	404399	377291	2.21398e+06	937982	160555	189489	269035	375193	2970.59	1193.84	67666.3	964041	309390	7.21502e+06	851944	12.416	13.4534	1105.02	3040.13	592.864	178775	2.43918e+07	2.03265e+07	22420.5	74588	42697.5	15897.8	3266.68	0
32	Espírito Santo	2006	SUDESTE	0	0	0	0	0	0	0	0	0	0	174.636	50.2055	69.8543	25.6043	179.355	30225.4	7191.6	12090.2	11279.7	66190.4	28042.5	4800.05	5665.08	8043.25	11217	852.464	342.594	19418	276649	88784.9	2.07048e+06	244480	1360.72	1474.41	121104	333179	64974.2	55787.2	7.61151e+06	6.34293e+06	4251.89	14145.1	8097.29	3014.92	619.503	0
33	Rio de Janeiro	2006	SUDESTE	0	0	0	0	0	0	0	0	0	0	331.599	95.3305	132.64	48.6175	340.559	57392.2	13655.4	22956.9	21418	125683	53247.2	9114.37	10756.9	15272.6	21298.9	461.937	185.646	10522.3	149911	48111.1	1.12196e+06	132480	0.388	0.42042	34.532	95.004	18.527	1427.44	194757	162298	4006.5	13328.8	7629.99	2840.92	583.751	0
35	São Paulo	2006	SUDESTE	0	8568.85	796.563	234.687	276924	492594	233990	36549.7	260717	248588	1561.52	448.916	624.607	228.942	1603.71	270263	64304.2	108105	100858	591846	250744	42920	50654.7	71919.2	100297	5174.21	2079.45	117862	1.67918e+06	538899	1.25672e+07	1.48392e+06	0	0	0	0	0	38567.4	5.26208e+06	4.38507e+06	267923	891324	510233	189979	39036.7	0
41	Paraná	2006	SUL	0	4540.53	422.089	124.358	146738	261020	123989	19367.2	138151	131724	3989.67	1146.98	1595.87	584.947	4097.48	690520	164297	276208	257693	1.51216e+06	640649	109661	129423	183753	256260	1159.09	465.824	26402.7	376159	120721	2.81523e+06	332419	0	0	0	0	0	23210.1	3.16675e+06	2.63896e+06	26246	87314.7	49982.8	18610.4	3824.06	0
42	Santa Catarina	2006	SUL	0	0	0	0	0	0	0	0	0	0	39148.1	11254.6	15659.3	5739.71	40206	6.77564e+06	1.61214e+06	2.71026e+06	2.52858e+06	1.48379e+07	6.28629e+06	1.07603e+06	1.26994e+06	1.80306e+06	2.51452e+06	5325.01	2140.05	121297	1.72812e+06	554605	1.29335e+07	1.52717e+06	0	0	0	0	0	1.93158	263.542	219.618	162.021	539.011	308.554	114.886	23.6067	0
43	Rio Grande do Sul	2006	SUL	0	0	0	0	0	0	0	0	0	0	261200	75091.6	104480	38295.9	268258	4.52077e+07	1.07564e+07	1.80831e+07	1.68709e+07	9.89999e+07	4.19427e+07	7.17937e+06	8.47318e+06	1.20302e+07	1.67771e+07	689.158	276.964	15698.2	223651	71776.5	1.67384e+06	197645	0	0	0	0	0	1.10376	150.595	125.496	809.775	2693.95	1542.13	574.193	117.985	0
50	Mato Grosso do Sul	2006	CENTRO-OESTE	0	15825.6	1471.15	433.438	511442	909759	432150	67502.6	481511	459111	4295.44	1234.88	1718.17	629.776	4411.5	743441	176889	297376	277442	1.62805e+06	689748	118065	139341	197836	275899	19.0256	7.64615	433.38	6174.35	1981.54	46209.7	5456.4	0	0	0	0	0	191.916	26184.7	21820.6	12566.4	41805.7	23931.5	8910.56	1830.94	0
51	Mato Grosso	2006	CENTRO-OESTE	0	270429	25139.2	7406.63	8.73958e+06	1.55461e+07	7.38463e+06	1.15349e+06	8.2281e+06	7.84534e+06	14808.5	4257.25	5923.4	2171.15	15208.6	2.56301e+06	609823	1.0252e+06	956481	5.61272e+06	2.3779e+06	407028	480379	682040	951162	189.685	76.2318	4320.78	61558.1	19755.9	460710	54400.2	8.73	9.45945	776.97	2137.59	416.858	907.705	123846	103205	8723.99	29022.8	16614	6185.99	1271.09	0
52	Goiás	2006	CENTRO-OESTE	0	25747.2	2393.46	705.175	832083	1.48012e+06	703080	109822	783386	746943	5072.32	1458.23	2028.93	743.68	5209.38	877902	208881	351161	327621	1.92251e+06	814498	139418	164543	233617	325799	561.211	225.543	12783.7	182129	58450.7	1.36308e+06	160951	0	0	0	0	0	418.187	57056.8	47547.3	18545.2	61696	35317.6	13150	2702.06	0
53	Distrito Federal	2006	CENTRO-OESTE	0	1212.17	112.684	33.1994	39174.2	69683.5	33100.8	5170.4	36881.6	35165.9	33.9531	9.76107	13.5812	4.97804	34.8705	5876.5	1398.21	2350.6	2193.03	12868.9	5452.08	933.238	1101.42	1563.79	2180.83	9.99845	4.01824	227.752	3244.78	1041.35	24284.4	2867.48	0	0	0	0	0	100.994	13779.5	11482.9	8.40672	27.9674	16.0098	5.96102	1.22487	0
[truncated: 96 more columns]

## Sheet: DB_ProductionFE
STATES AND YEARS ANALIZED				COTTON			RICE			BANANA			COCOA			COFFE			SUGARCANE			BEANS			ORANGE			CASSAVA			CORN			SOYBEAN			WHEAT			CROP PRODUCTION PR-GE-ME
CODST	STATE	YEAR	REGION	ALGPRTOT	ALGGETOT	ALGMETOT	ARRPRTOT	ARRGETOT	ARRMETOT	BANPRTOT	BANGETOT	BANMETOT	CACPRTOT	CACGETOT	CACMETOT	CAFPRTOT	CAFGETOT	CAFMETOT	CANPRTOT	CANGETOT	CANMETOT	FEIPRTOT	FEIGETOT	FEIMETOT	LARPRTOT	LARGETOT	LARMETOT	MANPRTOT	MANGETOT	MANMETOT	MILPRTOT	MILGETOT	MILMETOT	SOJPRTOT	SOJGETOT	SOJMETOT	TRIPRTOT	TRIGETOT	TRIMETOT	CROPPPRTOT	CROPPGETOT	CROPPMETOT
11	Rondônia	1975	NORTE	11.7167	1269.37	318.2	16667	4.23558e+06	935412	6552.62	774343	77716.9	0.80842	129.536	18.527	141.971	19370.3	16141.9	20.991	10105.2	791.885	2277.71	290972	84676.1	5.97961	1422.18	727.25	2212.35	401500	191453	4867.04	1.10412e+06	508556	26.994	2385.5	1141.14	0	0	0	32785.1	6.8412e+06	1.81695e+06
12	Acre	1975	NORTE	0	0	0	1877.05	477016	105347	3700.07	437248	43884.4	0	0	0	4.96692	677.678	564.732	120.317	57921.4	4538.96	1360.4	173787	50574	4.23576	1007.42	515.16	6854.39	1.24394e+06	593168	2438.03	553085	254749	0	0	0	0	0	0	16359.5	2.94469e+06	1.05334e+06
13	Amazonas	1975	NORTE	0	0	0	410.075	104212	23014.9	9644.74	1.13975e+06	114391	226.358	36270.1	5187.56	13.659	1863.62	1553.01	155.224	74725.7	5855.82	1000.39	127798	37190.6	39.7954	9464.84	4839.98	46487.2	8.43655e+06	4.02293e+06	1266.11	287226	132296	0	0	0	0	0	0	59243.6	1.02179e+07	4.34726e+06
14	Roraima	1975	NORTE	0	0	0	512.129	130147	28742.6	783.094	92540.5	9287.83	0	0	0	0.27594	37.6488	31.374	2.3649	1138.48	89.2161	176.855	22592.7	6574.74	6.04355	1437.38	735.026	604.92	109782	52348.8	572.822	129949	59854.1	0	0	0	0	0	0	2658.5	487625	157664
15	Pará	1975	NORTE	25.0684	2715.86	680.8	24879.3	6.32259e+06	1.39632e+06	18623.1	2.20075e+06	220878	702.517	112567	16100	47.0478	6419.12	5349.27	3236.64	1.55814e+06	122102	3155.69	403132	117316	77.8836	18523.7	9472.33	88930.3	1.61392e+07	7.69588e+06	11404.8	2.58727e+06	1.19169e+06	0	0	0	0	0	0	151082	2.93513e+07	1.07758e+07
16	Amapá	1975	NORTE	0	0	0	108.292	27520.2	6077.73	2023.16	239083	23995.5	0.80842	129.536	18.527	0.96579	131.771	109.809	14.4826	6972.02	546.357	20.7694	2653.24	772.123	5.94285	1413.43	722.779	3209.8	582518	277771	156.714	35551.7	16375	0	0	0	0	0	0	5540.93	895973	326389
17	Tocantins	1975	NORTE	0	0	0	0	0	0	0	0	0	0	0	0	0	0	0	0	0	0	0	0	0	0	0	0	0	0	0	0	0	0	0	0	0	0	0	0	0	0	0
21	Maranhão	1975	NORDESTE	143.326	15527.7	3892.4	118665	3.01563e+07	6.65992e+06	14758	1.744e+06	175036	6.06315	971.52	138.952	11.3135	1543.6	1286.33	1374.46	661674	51851.5	6900.79	881559	256544	300.176	71393.3	36507.9	51194.5	9.29084e+06	4.43029e+06	19852.6	4.5037e+06	2.07439e+06	8.998	795.168	380.38	0	0	0	213215	4.73283e+07	1.36902e+07
22	Piauí	1975	NORDESTE	611.996	66302.5	16620.4	17720.5	4.50333e+06	994543	4585.83	541921	54389.9	0	0	0	1.65564	225.893	188.244	3851.9	1.85433e+06	145313	13858.2	1.77035e+06	515193	72.967	17354.3	8874.36	12380.5	2.24682e+06	1.07139e+06	17657	4.00561e+06	1.84497e+06	2.045	180.72	86.45	0	0	0	70742.6	1.50064e+07	4.65157e+06
23	Ceará	1975	NORDESTE	10314.3	1.11743e+06	280112	10069.7	2.55901e+06	565147	43941.8	5.19274e+06	521169	1.21263	194.304	27.7905	536.979	73264.6	61053.8	22144.3	1.06604e+07	835396	29952.9	3.82641e+06	1.11353e+06	76.9726	18307	9361.53	26092.7	4.73534e+06	2.25802e+06	42692.6	9.68512e+06	4.46094e+06	4.908	433.728	207.48	0	0	0	185828	3.78687e+07	1.0105e+07
24	Rio Grande do Norte	1975	NORDESTE	5944.48	644014	161438	1153.52	293144	64739.8	3069.97	362787	36411.1	0	0	0	0.41391	56.4732	47.061	11071.6	5.32993e+06	417675	9521.2	1.21631e+06	353960	9.7934	2329.24	1191.09	7157.38	1.29893e+06	619388	6540.76	1.48382e+06	683443	0	0	0	0	0	0	44469.1	1.06313e+07	2.33829e+06
25	Paraíba	1975	NORDESTE	6704.98	726405	182092	2857.39	726148	160367	11702.1	1.38287e+06	138792	0	0	0	29.8015	4066.07	3388.39	37119.6	1.78696e+07	1.40034e+06	20063.6	2.56307e+06	745882	230.029	54709.6	27976.5	15660.1	2.84202e+06	1.3552e+06	17310	3.92689e+06	1.80872e+06	0.409	36.144	17.29	0	0	0	111678	3.00958e+07	5.82277e+06
26	Pernambuco	1975	NORDESTE	3051.53	330597	82872.6	1487.82	378099	83501.8	39009.7	4.6099e+06	462672	1.61684	259.072	37.054	1196.61	163264	136053	276815	1.33261e+08	1.04429e+07	31249.1	3.992e+06	1.16172e+06	248.864	59189.4	30267.3	39461	7.16143e+06	3.41489e+06	26656.9	6.04731e+06	2785376	20.041	1771.06	847.21	0	0	0	419198	1.56004e+08	1.86011e+07
27	Alagoas	1975	NORDESTE	2316.37	250952	62907.4	2031.66	516307	114024	10707.6	1.26535e+06	126997	0	0	0	16.5564	2258.93	1882.44	225833	1.08718e+08	8.51956e+06	18320.5	2.3404e+06	681082	35.6124	8469.96	4331.23	8487.18	1.54026e+06	734467	7020.74	1.59271e+06	733596	0	0	0	0	0	0	274769	1.16234e+08	1.09788e+07
28	Sergipe	1975	NORDESTE	509.27	55173.4	13830.6	2930.91	744832	164493	2158.04	255022	25595.2	0	0	0	4.41504	602.381	501.984	14851.5	7.14962e+06	560274	3401.46	434528	126453	528.099	125602	64228.2	12481.1	2.26508e+06	1.08009e+06	4447.02	1.00884e+06	464668	0	0	0	0	0	0	41311.8	1.20393e+07	2.50014e+06
29	Bahia	1975	NORDESTE	6217.23	673564	168846	2863.49	727700	160710	58569	6.92127e+06	694653	117218	1.87823e+07	2.68635e+06	2297.61	313483	261236	15139.3	7.28816e+06	571131	51506.2	6.57979e+06	1.91479e+06	841.182	200065	102306	123654	2.24409e+07	1.07008e+07	38071.6	8.63681e+06	3.97809e+06	33.947	2999.95	1435.07	0	0	0	416412	7.2567e+07	2.12404e+07
31	Minas Gerais	1975	SUDESTE	14878.6	1.61192e+06	404070	74820.8	1.90142e+07	4.19922e+06	38633.3	4.56541e+06	458207	4.0421	647.68	92.635	40402.7	5.51248e+06	4.59373e+06	73010.3	3.51476e+07	2.75431e+06	58734.3	7.50316e+06	2.1835e+06	1354.12	322061	164690	21049.5	3.82008e+06	1.82159e+06	259845	5.89477e+07	27151168	19527.3	1.72566e+06	825494	127.939	30876.2	10489.6	602388	1.38202e+08	4.45666e+07
32	Espírito Santo	1975	SUDESTE	114.715	12428	3115.4	4973.72	1.26397e+06	279144	30262.8	3.57625e+06	358930	3828.68	613482	87743.9	14967.5	2.04215e+06	1.70179e+06	9765.36	4.70111e+06	368398	6987.65	892654	259773	222.333	52879.1	27040.5	10291.5	1.86771e+06	890609	20491.6	4.64866e+06	2.14116e+06	51.125	4518	2161.25	0	0	0	101957	1.96758e+07	6.11986e+06
33	Rio de Janeiro	1975	SUDESTE	38.42	4162.36	1043.4	8864.52	2.25274e+06	497510	48163.3	5.6916e+06	571237	1.21263	194.304	27.7905	543.464	74149.3	61791.1	129374	6.22814e+07	4.88063e+06	2227.68	284580	82816	3117.09	741362	379105	7700.35	1.39747e+06	666375	8430.9	1.91261e+06	880943	18.405	1626.48	778.05	0	0	0	208479	7.46419e+07	8.02226e+06
35	São Paulo	1975	SUDESTE	107559	1.16527e+07	2.92105e+06	69533.7	1.76706e+07	3.90249e+06	69222.3	8.1802e+06	821006	5.65894	906.752	129.689	117237	1.59956e+07	1.33297e+07	675579	3.25228e+08	2.54863e+07	29371.1	3.75208e+06	1.0919e+06	26674.1	6.34412e+06	3.24415e+06	11122.2	2.01847e+06	962497	289219	6.56114e+07	3.02204e+07	257497	2.27554e+07	1.08854e+07	5872.99	1.41736e+06	481522	1.65889e+06	4.80627e+08	9.33465e+07
41	Paraná	1975	SUL	74366.7	8.05676e+06	2.01963e+06	91772.9	2.33223e+07	5.15064e+06	7124.34	841905	84497.7	0	0	0	164876	2.24954e+07	1.87462e+07	33021.4	1.58967e+07	1.24573e+06	114079	1.45733e+07	4.241e+06	378.097	89925.7	45984.7	19281.4	3.49922e+06	1.66858e+06	462157	1.04844e+08	4.82907e+07	1.26915e+06	1.12157e+08	5.36517e+07	65360.4	1.57738e+07	5358848	2.30156e+06	3.2155e+08	1.40503e+08
42	Santa Catarina	1975	SUL	0	0	0	27557.8	7.00328e+06	1.54665e+06	25147.6	2.97176e+06	298261	0	0	0	126.381	17243.2	14369.3	9813.24	4.72416e+06	370205	29967.1	3.82822e+06	1.11406e+06	401.795	95562	48866.9	55353.8	1.00457e+07	4.79023e+06	223901	5.07936e+07	2.33954e+07	110786	9.79033e+06	4.68334e+06	3640.16	878499	298454	486695	9.01483e+07	3.65598e+07
43	Rio Grande do Sul	1975	SUL	0.272482	29.5203	7.4	248993	6.32767e+07	1.39744e+07	10520.4	1.24323e+06	124777	0	0	0	3.72519	508.259	423.549	12178.7	5.86289e+06	459440	35038.6	4.4761e+06	1.30259e+06	1720.85	409284	209293	68687	1.24654e+07	5.94406e+06	290466	6.58943e+07	3.03507e+07	1.80756e+06	1.59737e+08	7.64125e+07	192362	4.64238e+07	1.57716e+07	2.66753e+06	3.59789e+08	1.4455e+08
50	Mato Grosso do Sul	1975	CENTRO-OESTE	8662.22	938449	235246	77693.8	1.97443e+07	4.36047e+06	3233.03	382057	38345.1	0	0	0	1821.2	248482	207068	204.691	98539.8	7721.99	3066.01	391674	113982	94.0067	22358.4	11433.2	4099.86	744047	354795	17534.7	3.97788e+06	1.8322e+06	68704.2	6.07151e+06	2.90439e+06	1018.19	245724	83480.3	186132	3.28651e+07	1.01491e+07
51	Mato Grosso	1975	CENTRO-OESTE	725.076	78553.4	19691.4	47203.9	1.19959e+07	2.64926e+06	5900.38	697265	69981	0	0	0	430.328	58713.3	48927.8	1388.8	668580	52392.7	6542.68	835811	243230	41.1812	9794.44	5008.52	2446.32	443961	211701	12564.6	2.85038e+06	1.31288e+06	2.045	180.72	86.45	0	0	0	77245.3	1.76392e+07	4.61315e+06
52	Goiás	1975	CENTRO-OESTE	12842.1	1.39129e+06	348762	146021	3.71083e+07	8.19522e+06	27358	3.23297e+06	324477	1.21263	194.304	27.7905	515.456	70328	58606.6	6619.54	3.18669e+06	249723	24003.8	3.06642e+06	892363	139.457	33168.2	16961	4118.6	747448	356417	146904	3.33261e+07	1.53499e+07	33608.8	2.97006e+06	1.42077e+06	0	0	0	402131	8.51329e+07	2.72133e+07
53	Distrito Federal	1975	CENTRO-OESTE	0	0	0	152.219	38683.4	8543.09	1219.94	144163	14469	0	0	0	3.17331	432.961	360.801	66.6473	32084.5	2514.27	166.155	21225.9	6176.98	12.8208	3049.26	1559.28	156.945	28482.5	13581.7	325.826	73915.8	34045.4	0.818	72.288	34.58	0.68692	165.778	56.32	2105.23	342276	81341.4
11	Rondônia	1985	NORTE	81.7447	8856.08	2220	29848.8	7.58548e+06	1.67523e+06	5022.67	593544	59571	3966.92	635633	90912	8961.98	1.22276e+06	1.01896e+06	87.6774	42208.5	3307.63	10758.2	1.37434e+06	399948	27.4461	6527.73	3338.04	3866.33	701666	334586	15706.2	3.56306e+06	1.64114e+06	514.113	45433	21733.5	0	0	0	78842.1	1.57795e+07	5.25094e+06
12	Acre	1985	NORTE	0.272482	29.5203	7.4	2557.86	650029	143557	4865.65	574988	57708.7	34.3578	5505.28	787.398	57.6715	7868.6	6557.17	38.933	18742.6	1468.75	1693.97	216400	62974.8	15.5652	3702	1893.07	3546.49	643621	306907	3136.98	711646	327782	0.409	36.144	17.29	0	0	0	15948.2	2.83257e+06	909661
13	Amazonas	1985	NORTE	3.26979	354.243	88.8	953.789	242387	53530.2	29888.4	3.532e+06	354489	868.243	139122	19898	48.4275	6607.36	5506.14	138.005	66436.5	5206.24	1557.08	198913	57885.8	72.7496	17302.6	8847.92	41409.5	7.51505e+06	3.58351e+06	1982.31	449701	207131	4.908	433.728	207.48	0	0	0	76926.7	1.21683e+07	4.29631e+06
14	Roraima	1985	NORTE	0	0	0	3016.11	766484	169275	1306.5	154393	15495.6	1.21263	194.304	27.7905	2.34549	320.015	266.679	12.45	5993.49	469.675	168.987	21587.7	6282.27	12.0312	2861.46	1463.25	897.898	162952	77702.7	1289.02	292423	134689	8.589	759.024	363.09	0	0	0	6715.14	1.40797e+06	406036
15	Pará	1985	NORTE	900.555	97564.5	24457	41605.2	1.05731e+07	2.33504e+06	30377.6	3.58981e+06	360291	9025.61	1.4462e+06	206845	461.51	62967.6	52473	2771.12	1.33404e+06	104541	13965.9	1.7841e+06	519194	87.6898	20856	10665	102205	1.85484e+07	8.84469e+06	20715.1	4.69937e+06	2.16452e+06	133.334	11782.9	5636.54	0	0	0	222249	4.21682e+07	1.46284e+07
16	Amapá	1985	NORTE	0	0	0	48.7047	12377.3	2733.49	944.141	111572	11197.9	6.06315	971.52	138.952	1.79361	244.717	203.931	28.672	13802.9	1081.65	34.6157	4422.07	1286.87	3.192	759.18	388.217	2017.09	366063	174555	109.417	24822	11433	0	0	0	0	0	0	3193.69	535035	203019
17	Tocantins	1985	NORTE	59.9461	6494.46	1628	52836.6	1.34274e+07	2.96539e+06	16519.5	1.95215e+06	195928	18.9979	3044.1	435.385	14.6248	1995.39	1662.82	2422.35	1.16613e+06	91383.1	2205.02	281686	81973.7	31.4469	7479.27	3824.63	2776.17	503823	240245	9538.14	2.1638e+06	996639	12283.9	1.08555e+06	519288	0	0	0	98706.7	2.05995e+07	5.0984e+06
21	Maranhão	1985	NORDESTE	849.873	92073.7	23080.6	103424	2.62832e+07	5.80455e+06	17741.4	2.09655e+06	210421	8.0842	1295.36	185.27	16.9703	2315.4	1929.5	15515.1	7.46906e+06	585306	8903.15	1.13736e+06	330983	162.543	38658.9	19768.7	44887	8.14614e+06	3.88444e+06	28181.3	6.39314e+06	2.94466e+06	3308.4	292369	139859	0	0	0	222998	5.19521e+07	1.39452e+07
22	Piauí	1985	NORDESTE	4050.45	438819	110001	20362.3	5.17467e+06	1.14281e+06	2663.32	314733	31588.2	0	0	0	1.3797	188.244	156.87	6123.21	2.94775e+06	230998	16679.4	2.13075e+06	620073	54.6621	13000.7	6648.09	11857.4	2.15189e+06	1.02612e+06	24153.3	5.47934e+06	2.52377e+06	58.078	5132.45	2455.18	0	0	0	86003.4	1.86563e+07	5.69462e+06
23	Ceará	1985	NORDESTE	33665.2	3.64723e+06	914270	13742.2	3.4923e+06	771261	33997.1	4.01754e+06	403221	0	0	0	524.838	71608	59673.3	26289.8	1.26561e+07	991783	27955	3.57118e+06	1.03925e+06	39.4821	9390.33	4801.87	18590.3	3.37379e+06	1.60877e+06	41716	9.46358e+06	4.3589e+06	7.362	650.592	311.22	0.51519	124.333	42.24	196528	4.03035e+07	1.01523e+07
24	Rio Grande do Norte	1985	NORDESTE	7266.56	787246	197343	1368.24	347712	76790.9	3824.88	451997	45364.7	0	0	0	3.03534	414.137	345.114	49762.1	2.39558e+07	1.87728e+06	9774.21	1.24863e+06	363366	9.84455	2341.41	1197.31	13632.4	2.47402e+06	1.17972e+06	5295.41	1.2013e+06	553316	0	0	0	0	0	0	90936.6	3.04695e+07	4.29472e+06
25	Paraíba	1985	NORDESTE	9874.76	1.06981e+06	268176	3579.73	909717	200908	30882.9	3.64952e+06	366284	0	0	0	18.6259	2541.29	2117.74	109008	5.24772e+07	4.11233e+06	19405.9	2.47905e+06	721432	117.986	28061.5	14349.6	10845.2	1.96821e+06	938530	21646.4	4.91063e+06	2.26183e+06	48.671	4301.14	2057.51	0	0	0	205428	6.7499e+07	8.88801e+06
26	Pernambuco	1985	NORDESTE	4239.83	459335	115144	3724.78	946579	209049	74852.9	8.84559e+06	887787	2.02105	323.84	46.3175	1011.73	138039	115033	464461	2.23594e+08	1.75218e+07	30470.3	3.8925e+06	1.13276e+06	156.426	37204	19024.8	38182.5	6.92941e+06	3.30425e+06	36697	8.32498e+06	3.83446e+06	133.334	11782.9	5636.54	0	0	0	653931	2.5318e+08	2.7145e+07
27	Alagoas	1985	NORDESTE	7434.14	805401	201894	2370.47	602409	133040	10172.2	1.20208e+06	120646	0.40421	64.768	9.2635	12.2793	1675.37	1396.14	485553	2.33748e+08	1.83175e+07	12425.8	1.58736e+06	461940	41.3458	9833.6	5028.54	8311.66	1.50841e+06	719278	7097.01	1.61001e+06	741565	43.763	3867.41	1850.03	0	0	0	533462	2.4108e+08	2.07041e+07
28	Sergipe	1985	NORDESTE	2489.94	269756	67621.2	3027.92	769486	169938	3200.82	378250	37963.1	0	0	0	1.93158	263.542	219.618	27583.5	1.32789e+07	1.04059e+06	3374.71	431111	125458	2046.02	486621	248840	16632.2	3.01844e+06	1.43933e+06	7642.89	1.73384e+06	798604	8.18	722.88	345.8	0	0	0	66008.1	2.03674e+07	3.9289e+06
29	Bahia	1985	NORDESTE	39064.2	4.23214e+06	1.06089e+06	7956.52	2.02199e+06	446549	73274.6	8.65908e+06	869068	171776	2.75242e+07	3.93667e+06	14636.8	1.99702e+06	1.66419e+06	39673.1	1.90989e+07	1.49667e+06	101353	1.29476e+07	3.7679e+06	1328.64	316002	161592	116746	2.11872e+07	1.0103e+07	58610.9	1.32963e+07	6.12424e+06	24680.3	2.18104e+06	1.04333e+06	24.5574	5926.56	2013.44	649124	1.13467e+08	3.06761e+07
31	Minas Gerais	1985	SUDESTE	42672.1	4.62302e+06	1158877	86123.2	2.18865e+07	4.83355e+06	51726.5	6.11267e+06	613498	5.65894	906.752	129.689	185227	2.52721e+07	2.106e+07	219333	1.05588e+08	8.27433e+06	67071.3	8.5682e+06	2.49344e+06	2767.2	658145	336552	24817.5	4.50391e+06	2.14767e+06	324120	7.3529e+07	3.38673e+07	261170	2.308e+07	1.10407e+07	3170.65	765190	259959	1.2682e+06	2.74588e+08	8.6086e+07
32	Espírito Santo	1985	SUDESTE	9.2644	1003.69	251.6	9013.15	2.29051e+06	505852	46850.7	5.53649e+06	555670	4892.56	783952	112125	66065.8	9.01391e+06	7.51159e+06	47115.2	2.26816e+07	1.77742e+06	13764.8	1.75841e+06	511719	207.592	49373.3	25247.7	18125.8	3.28948e+06	1.56857e+06	21777.9	4.94047e+06	2.27557e+06	85.481	7554.1	3613.61	0	0	0	227908	5.03528e+07	1.48476e+07
33	Rio de Janeiro	1985	SUDESTE	0	0	0	11306.9	2.87343e+06	634587	56483.4	6.67481e+06	669917	1.61684	259.072	37.054	2384.4	325323	271103	156960	7.55616e+07	5.92132e+06	2961.53	378328	110098	2977.85	708245	362171	7174.9	1.30211e+06	620904	10158.1	2.30444e+06	1.06142e+06	7.362	650.592	311.22	0	0	0	250416	9.01292e+07	9.65187e+06
35	São Paulo	1985	SUDESTE	155593	1.68567e+07	4.22556e+06	42347.1	1.07617e+07	2.37668e+06	82339.6	9.73031e+06	976583	52.5473	8419.84	1204.26	144672	1.97389e+07	1.6449e+07	2.4431e+06	1.17612e+09	9.2166e+07	58125.1	7.42533e+06	2.16086e+06	80920.9	1.9246e+07	9.84173e+06	19846.7	3.6018e+06	1.7175e+06	336233	7.6277e+07	3.5133e+07	389448	3.44162e+07	1.64635e+07	45083.9	1.08803e+07	3.69639e+06	3.79776e+06	1.38507e+09	1.85208e+08
41	Paraná	1985	SUL	230706	2.49943e+07	6.26545e+06	24788.3	6.29946e+06	1.39121e+06	17856.1	2.11011e+06	211782	0	0	0	78530.6	1.07146e+07	8.92882e+06	202756	9.76081e+07	7.64898e+06	134537	1.71868e+07	5.00155e+06	747.468	177776	90908.2	51733.1	9.38859e+06	4.4769e+06	559284	1.26878e+08	5.84395e+07	1.70198e+06	1.50407e+08	7.19493e+07	405455	9.78505e+07	33242880	3.40837e+06	5.43615e+08	1.97647e+08
42	Santa Catarina	1985	SUL	4.35972	472.324	118.4	43480.3	1.10497e+07	2.44028e+06	52865.9	6.24732e+06	627012	0	0	0	81.6782	11144	9286.7	17743	8.54162e+06	669357	78039.5	9.96935e+06	2.90119e+06	519.721	123609	63209.4	49087.1	8.90839e+06	4.24792e+06	261815	5.93945e+07	2.7357e+07	212570	1.87851e+07	8.98613e+06	6573.48	1.58641e+06	538954	722779	1.24618e+08	4.78404e+07
43	Rio Grande do Sul	1985	SUL	0	0	0	469437	1.19298e+08	2.63465e+07	17133.4	2.02471e+06	203210	0	0	0	3.44925	470.61	392.175	20439.4	9.83965e+06	771076	41408.8	5.28988e+06	1.53941e+06	1908.19	453839	232077	68166.2	1.23709e+07	5.899e+06	327213	7.42306e+07	3.41904e+07	2.33574e+06	2.06413e+08	9.87408e+07	155369	3.7496e+07	1.27386e+07	3.43682e+06	4.67417e+08	1.80661e+08
50	Mato Grosso do Sul	1985	CENTRO-OESTE	24653.9	2.67096e+06	669545	31233	7.93724e+06	1.75291e+06	3528.95	417027	41854.9	0.40421	64.768	9.2635	875.282	119422	99518.3	47964.5	2.30904e+07	1.80946e+06	7658.25	978322	284703	66.6085	15842	8101.04	7349.25	1.33375e+06	635992	34268.8	7.77412e+06	3.58074e+06	741059	6.54886e+07	3.13274e+07	40886.3	9.86731e+06	3.35224e+06	939545	1.19693e+08	4.35625e+07
51	Mato Grosso	1985	CENTRO-OESTE	3263.79	353594	88637.2	80813.3	2.05371e+07	4.53554e+06	21948.8	2.59375e+06	260322	419.974	67294	9624.78	4844.95	661038	550865	21232.2	1.02213e+07	800984	7020.06	896795	260977	50.8755	12100.1	6187.56	5548.89	1.00702e+06	480192	32328.1	7.33387e+06	3.37796e+06	658707	5.8211e+07	2.78461e+07	61.9945	14961.5	5082.88	836240	1.0191e+08	3.82224e+07
52	Goiás	1985	CENTRO-OESTE	26703.8	2.89304e+06	725215	102357	2.6012e+07	5.74465e+06	18858.7	2.22859e+06	223672	0	0	0	1924.13	262525	218771	86763.6	4.17686e+07	3.27316e+06	31998.4	4.08772e+06	1.18957e+06	253.057	60186.6	30777.2	3018.37	547778	261205	203192	4.60955e+07	2.12315e+07	473501	4.18441e+07	2.00167e+07	73.3287	17696.8	6012.16	948643	1.65818e+08	5.29212e+07
53	Distrito Federal	1985	CENTRO-OESTE	0.272482	29.5203	7.4	1249.87	317629	70147.1	769.002	90875.3	9120.69	0	0	0	101.96	13911.2	11592.7	95.9643	46197.9	3620.26	276.925	35376.5	10295	12.2629	2916.59	1491.44	138.091	25060.9	11950.2	1191.73	270352	124524	27097.9	2.39468e+06	1.14553e+06	45.8519	11065.7	3759.36	30979.8	3.2081e+06	1.39204e+06
11	Rondônia	1995	NORTE	580.388	62878.2	15762	11632.9	2.95626e+06	652879	4259.71	503382	50522	1456.77	233424	33385.7	10888.3	1.48558e+06	1.23799e+06	450.055	216660	16978.3	15083	1.92681e+06	560725	82.5318	19629.2	10037.6	2979.39	540703	257831	18020.1	4.08799e+06	1.88292e+06	615.545	54396.7	26021.5	0	0	0	66048.7	1.20877e+07	4.74505e+06
12	Acre	1995	NORTE	6.53958	708.486	177.6	2645.98	672423	148502	6939.14	820018	82301.1	6.46736	1036.29	148.216	49.8072	6795.61	5663.01	55.5264	26730.8	2094.74	1689.56	215837	62811	35.0257	8330.45	4259.89	6943.04	1.26003e+06	600840	3745.24	849635	391340	6.135	542.16	259.35	0	0	0	22122.5	3.86209e+06	1.2984e+06
13	Amazonas	1995	NORTE	4.35972	472.324	118.4	853.195	216823	47884.5	34059.5	4.02492e+06	403961	399.359	63990.8	9152.34	38.2177	5214.36	4345.3	167.048	80418.2	6301.9	1239.56	158350	46081.7	97.7086	23238.8	11883.5	46916.2	8.51441e+06	4.06005e+06	1758.62	398956	183758	11.043	975.888	466.83	0	0	0	85544.9	1.34878e+07	4.77401e+06
14	Roraima	1995	NORTE	4.08724	442.804	111	4050.32	1.02931e+06	227319	3955.73	467460	46916.7	2.42526	388.608	55.581	4.96692	677.678	564.732	11.3555	5466.59	428.385	176.54	22552.5	6563.04	11.6236	2764.52	1413.68	1404.05	254808	121504	1957.24	444015	204512	274.03	24216.5	11584.3	0	0	0	11852.4	2.2521e+06	620972
15	Pará	1995	NORTE	279.567	30287.8	7592.4	26219	6.66305e+06	1.47151e+06	21326.7	2.52024e+06	252944	6087.81	975471	139518	885.078	120759	100632	1086.57	523080	40990.7	8025.17	1.0252e+06	298344	678.521	161378	82522.8	75973.7	1.37878e+07	6.57464e+06	18554.5	4.20923e+06	1.93876e+06	90.798	8023.97	3838.38	1.20211	290.111	98.56	159209	3.00248e+07	1.09114e+07
16	Amapá	1995	NORTE	0	0	0	72.7253	18481.7	4081.61	829.395	98012.1	9836.98	9.70104	1554.43	222.324	2.7594	376.488	313.74	48.334	23268.3	1823.4	46.8885	5989.89	1743.13	32.3852	7702.42	3938.74	1241.04	225225	107398	48.3753	10974.3	5054.72	0	0	0	0	0	0	2331.6	391585	134412
17	Tocantins	1995	NORTE	54.769	5933.57	1487.4	34661.8	8.80861e+06	1.94535e+06	7057.91	834054	83709.8	12.5305	2007.81	287.169	1.3797	188.244	156.87	1753.02	843915	66132.7	604.201	77185.2	22461.8	25.3586	6031.24	3084.16	1699.03	308341	147031	9482.22	2.15111e+06	990796	5766.08	509558	243754	0	0	0	61118.3	1.35469e+07	3.50425e+06
21	Maranhão	1995	NORDESTE	510.905	55350.5	13875	74484.3	1.89287e+07	4.18034e+06	19525	2.30733e+06	231575	0.80842	129.536	18.527	7.45038	1016.52	847.098	16207.6	7.80244e+06	611432	6235.54	796575	231812	90.1817	21448.6	10968	32519.4	5.90167e+06	2.81418e+06	24033.6	5.4522e+06	2.51127e+06	55264.9	4.88385e+06	2.33626e+06	0	0	0	228880	4.61507e+07	1.29426e+07
22	Piauí	1995	NORDESTE	1479.85	160325	40189.4	21323.6	5.41898e+06	1.19676e+06	3621.56	427970	42953.2	0	0	0	0.82782	112.946	94.122	9820	4.72742e+06	370460	16571.8	2.117e+06	616072	46.3904	11033.4	5642.07	11992	2.17633e+06	1.03777e+06	20266	4.59749e+06	2.11759e+06	8299.84	733470	350866	0	0	0	93421.9	2.03701e+07	5.7784e+06
23	Ceará	1995	NORDESTE	1545.25	167409	41965.4	14803.7	3.76207e+06	830839	56044.5	6.62295e+06	664712	0	0	0	390.869	53329.5	44441.3	20117.2	9.68458e+06	758924	38379.3	4.90287e+06	1.42679e+06	101.815	24215.4	12382.9	15047.9	2.73091e+06	1.30222e+06	50015.7	1.13464e+07	5.22613e+06	24.54	2168.64	1037.4	0	0	0	196471	3.92969e+07	1.03094e+07
24	Rio Grande do Norte	1995	NORDESTE	1737.89	188280	47197.2	924.726	235001	51899.1	4360.36	515277	51715.8	0	0	0	2.48346	338.839	282.366	62221.1	2.99537e+07	2.34729e+06	9818.89	1.25434e+06	365027	7.84175	1865.06	953.726	7254.98	1.31664e+06	627835	7337.81	1.66463e+06	766726	1.636	144.576	69.16	0	0	0	93667.7	3.51302e+07	4.259e+06
25	Paraíba	1995	NORDESTE	2319.64	251306	62996.2	2671.72	678966	149947	24604	2.90753e+06	291814	0	0	0	8.55414	1167.11	972.594	170669	8.21611e+07	6.43849e+06	16813.8	2.14792e+06	625068	72.0031	17125.1	8757.14	6261.1	1.13627e+06	541825	17109.7	3.88147e+06	1.78779e+06	31.902	2819.23	1348.62	0	0	0	240561	9.31857e+07	9.90901e+06
26	Pernambuco	1995	NORDESTE	403.002	43660.5	10944.6	1707.85	434016	95850.9	66259	7.83002e+06	785860	3.63789	582.912	83.3715	732.483	99938.7	83282.3	299411	1.44138e+08	1.12953e+07	36848.4	4.70729e+06	1.36987e+06	122.819	29211.1	14937.5	16467.8	2.98859e+06	1.42509e+06	27894.3	6.32803e+06	2.91467e+06	81.391	7192.66	3440.71	0	0	0	449931	1.66607e+08	1.79993e+07
27	Alagoas	1995	NORDESTE	741.425	80324.6	20135.4	1257.83	319652	70594	8281.87	978693	98226.5	0	0	0	5.79474	790.625	658.854	401560	1.93314e+08	1.51489e+07	20522.4	2.62168e+06	762939	250.309	59533.1	30443	10802.1	1.96038e+06	934795	9069.48	2.05748e+06	947668	35.992	3180.67	1521.52	0	0	0	452528	2.01396e+08	1.80159e+07
28	Sergipe	1995	NORDESTE	100.546	10893	2730.6	735.083	186807	41255.6	4477.12	529075	53100.6	0	0	0	4.00113	545.908	454.923	12905.7	6.2129e+06	486869	6195.26	791429	230315	4143.54	985491	503944	8284.8	1.50354e+06	716953	7418.93	1.68304e+06	775203	34.765	3072.24	1469.65	0	0	0	44299.8	1.19068e+07	2.81229e+06
29	Bahia	1995	NORDESTE	11927.4	1.29219e+06	323920	7782	1.97764e+06	436755	33799.9	3.99423e+06	400881	87102.8	1.39568e+07	1.99618e+06	13188.1	1.79937e+06	1.49947e+06	28988.1	1.39551e+07	1.09358e+06	83595.6	1.06791e+07	3.10775e+06	2549.8	606440	310111	48364.1	8.77717e+06	4.18535e+06	80328.9	1.82232e+07	8.39355e+06	295020	2.60714e+07	1.24716e+07	65.0857	15707.5	5336.32	692712	1.01348e+08	3.42245e+07
31	Minas Gerais	1995	SUDESTE	12718.9	1.37795e+06	345417	22186.9	5.63836e+06	1.24521e+06	51211.1	6.05177e+06	607386	20.2105	3238.4	463.175	207879	2.83627e+07	2.36356e+07	230879	1.11147e+08	8.70994e+06	64772.2	8.27449e+06	2.40797e+06	5095.23	1.21184e+06	619690	17323.7	3.14392e+06	1.49916e+06	412647	9.36119e+07	4.31174e+07	353744	3.12609e+07	1.49541e+07	1483.06	357915	121595	1.37996e+06	2.90442e+08	9.72639e+07
32	Espírito Santo	1995	SUDESTE	0.544965	59.0405	14.8	2249.31	571617	126240	27245.2	3.21965e+06	323140	2491.95	399295	57109.5	91850.4	1.25319e+07	1.04433e+07	34846.2	1.67752e+07	1.31457e+06	6670.44	852132	247980	199.623	47477.8	24278.4	8641.9	1.56834e+06	747856	10146.5	2.30182e+06	1.06021e+06	2.863	253.008	121.03	1.7173	414.445	140.8	184347	3.82682e+07	1.43449e+07
33	Rio de Janeiro	1995	SUDESTE	5.72213	619.926	155.4	2289.25	581768	128481	16163.1	1.91005e+06	191702	0	0	0	1296.23	176855	147379	111597	5.37234e+07	4.20999e+06	1603.02	204782	59593.8	404.211	96136.8	49160.8	2250.39	408404	194745	4534.88	1.02877e+06	473848	0.818	72.288	34.58	0.34346	82.889	28.16	140145	5.81309e+07	5.45512e+06
35	São Paulo	1995	SUDESTE	41139.1	4.45694e+06	1.11724e+06	7680.08	1.95174e+06	431035	77628.9	9.17364e+06	920712	60.6315	9715.2	1389.53	47039.2	6.41795e+06	5.34829e+06	3.00535e+06	1.44679e+09	1.13377e+08	54746.6	6.99374e+06	2.03526e+06	105990	2.52083e+07	1.28906e+07	11555.7	2.09714e+06	1.00001e+06	367912	8.34634e+07	3.8443e+07	347847	3.07398e+07	1.47048e+07	3657.33	882644	299862	4.0706e+06	1.61819e+09	1.90569e+08
41	Paraná	1995	SUL	72873.5	7.89499e+06	1.97908e+06	18853.6	4.79128e+06	1.05814e+06	13191.8	1.55892e+06	156460	13.7431	2202.11	314.959	15103.9	2.06074e+06	1.71729e+06	360449	1.73523e+08	1.35979e+07	120147	1.53485e+07	4.46659e+06	1604.35	381575	195123	79960.7	1.45114e+07	6.91967e+06	889255	2.01734e+08	9.29181e+07	2.48293e+06	2.1942e+08	1.04963e+08	145919	3.52155e+07	1.19638e+07	4.2003e+06	6.76442e+08	2.39935e+08
42	Santa Catarina	1995	SUL	0	0	0	66017.2	1.6777e+07	3.70513e+06	49920.7	5.89928e+06	592081	0	0	0	35.3203	4819.05	4015.87	10127.9	4.87565e+06	382076	70265.1	8.97619e+06	2.61217e+06	757.407	180140	92117	23975.2	4.35105e+06	2.07477e+06	310618	7.04659e+07	3.24564e+07	167225	1.47779e+07	7.06924e+06	7686.29	1.85497e+06	630193	706628	1.28163e+08	4.96182e+07
43	Rio Grande do Sul	1995	SUL	4.08724	442.804	111	616497	1.5667e+08	3.46001e+07	14713.7	1.73876e+06	174511	0.40421	64.768	9.2635	2.06955	282.366	235.305	24182.3	1.16415e+07	912278	32984.7	4.21371e+06	1.22624e+06	1836.37	436758	223342	45763.6	8.30523e+06	3.96031e+06	388800	8.82021e+07	4.06257e+07	1.73955e+06	1.53727e+08	7.35374e+07	78642.6	1.89792e+07	6.44784e+06	2.94298e+06	4.43915e+08	1.61708e+08
50	Mato Grosso do Sul	1995	CENTRO-OESTE	20901.9	2.26447e+06	567647	21551.4	5.47685e+06	1.20954e+06	3045.81	359933	36124.6	1.21263	194.304	27.7905	163.908	22363.4	18636.2	100857	4.85532e+07	3.80483e+06	3969.16	507050	147557	59.6635	14190.2	7256.37	13600.5	2.46824e+06	1.17697e+06	178952	4.05966e+07	1.86987e+07	734971	6.49506e+07	3.107e+07	5945.12	1.43477e+06	487436	1.08402e+06	1.66648e+08	5.72247e+07
51	Mato Grosso	1995	CENTRO-OESTE	12676.2	1.37331e+06	344255	78076.7	1.98416e+07	4.38195e+06	18250.7	2.15674e+06	216461	187.149	29987.6	4289	1275.95	174088	145073	162013	7.79944e+07	6.11196e+06	3675.87	469583	136654	59.8089	14224.8	7274.06	2430.86	441155	210363	162859	3.69456e+07	1.70171e+07	1.81431e+06	1.60334e+08	7.66978e+07	0	0	0	2.25581e+06	2.99774e+08	1.05273e+08
52	Goiás	1995	CENTRO-OESTE	39838.6	4.31604e+06	1.08192e+06	26690.3	6.78281e+06	1.49796e+06	19796.8	2.33944e+06	234798	0	0	0	501.521	68426.7	57022.2	130148	6.26543e+07	4.90986e+06	26677.7	3.40801e+06	991768	498.63	118593	60644.2	6181.29	1.12179e+06	534919	400420	9.08382e+07	4.18398e+07	801686	7.08463e+07	3.38904e+07	1662.35	401183	136294	1.4541e+06	2.42895e+08	8.52354e+07
53	Distrito Federal	1995	CENTRO-OESTE	0	0	0	69.0094	17537.4	3873.06	209.362	24740.9	2483.12	0	0	0	220.752	30119	25099.2	129.757	62465.9	4895.09	2047.67	261585	76124.3	50.2009	11939.7	6105.52	93.377	16946.2	8080.69	14421.3	3.27159e+06	1.50688e+06	20543.3	1.81544e+06	868442	1047.9	252894	85916.2	38832.6	5.76526e+06	2.5879e+06
11	Rondônia	2006	NORTE	0	0	0	12443.5	3.16226e+06	698373	1613.83	190711	19140.7	2405.86	385499	55136.4	10801	1.47367e+06	1.22806e+06	632.465	304473	23859.8	8562.98	1.0939e+06	318337	37.9121	9016.92	4610.93	5132.06	931373	444120	20985	4.7606e+06	2.19272e+06	51200.3	4.52465e+06	2.16443e+06	0	0	0	113815	1.68361e+07	7.14879e+06
12	Acre	2006	NORTE	0	0	0	8024.99	2.03939e+06	450393	4605.25	544216	54620.2	0	0	0	137.004	18692.6	15577.2	28.3984	13671.2	1071.33	4513.26	576557	167785	15.9241	3787.34	1936.71	11015	1.99902e+06	953223	11189.1	2.53833e+06	1.16915e+06	0	0	0	0	0	0	39529	7.73367e+06	2.81375e+06
13	Amazonas	2006	NORTE	0	0	0	864.475	219689	48517.6	7647.59	903738	90703.7	533.961	85558.5	12237.1	61.2587	8358.03	6965.03	661.861	318624	24968.7	1614.98	206309	60038.4	74.895	17812.9	9108.85	20019.4	3.63315e+06	1.73245e+06	2783.67	631494	290865	0	0	0	0	0	0	34262.1	6.02474e+06	2.27585e+06
14	Roraima	2006	NORTE	0	0	0	9599.47	2.43952e+06	538758	2647.42	312853	31399.5	0	0	0	3.31128	451.786	376.488	6.6061	3180.22	249.215	62.6229	7999.92	2328.07	5.96403	1418.47	725.355	373.786	67835.1	32346.8	2120.83	481125	221605	3740.31	330537	158117	0	0	0	18560.3	3.64492e+06	985906
15	Pará	2006	NORTE	0	0	0	34998.4	8.89414e+06	1.96424e+06	7448.25	880182	88339.5	11657.4	1.86791e+06	267159	244.207	33319.2	27766	442.53	213037	16694.5	13168.7	1.68227e+06	489561	910.998	216670	110797	171066	3.10452e+07	1.48038e+07	39695.1	9.00511e+06	4.14773e+06	22962.1	2.0292e+06	970695	0	0	0	302594	5.58671e+07	2.28867e+07
16	Amapá	2006	NORTE	0	0	0	113.202	28768	6353.31	111.51	13177.4	1322.55	1.21263	194.304	27.7905	0.13797	18.8244	15.687	36.1381	17397.1	1363.31	13.8463	1768.83	514.749	33.5264	7973.86	4077.54	902.959	163870	78140.6	108.608	24638.6	11348.5	0	0	0	0	0	0	1321.14	257807	103164
17	Tocantins	2006	NORTE	0	0	0	30267.2	7.69182e+06	1.69871e+06	3114.57	368058	36940.2	0	0	0	0	0	0	3303.21	1.59019e+06	124614	1252.46	159998	46561.3	12.2877	2922.48	1494.45	2674.73	485413	231467	13943.3	3.16313e+06	1456928	203819	1.80118e+07	8.61619e+06	0	0	0	258386	3.14733e+07	1.22129e+07
21	Maranhão	2006	NORDESTE	25479.3	2.76038e+06	691959	145014	3.68525e+07	8.13874e+06	12459.5	1.47237e+06	147775	0	0	0	0.41391	56.4732	47.061	14639.4	7.04749e+06	552271	12289.2	1.56991e+06	456863	20.3696	4844.66	2477.39	60290	1.09415e+07	5.2174e+06	84518.3	1.91736e+07	8.8313e+06	314600	2.78017e+07	1.32994e+07	0	0	0	669311	1.07624e+08	3.73382e+07
22	Piauí	2006	NORDESTE	56.6764	6140.21	1539.2	39708.8	1.00912e+07	2.22861e+06	8343.49	985975	98957.3	0	0	0	0.13797	18.8244	15.687	10792.6	5.19565e+06	407153	28884.9	3.68997e+06	1.07382e+06	5.86413	1394.71	713.205	11297.4	2.05026e+06	977658	44815	1.01666e+07	4.68271e+06	229733	2.03019e+07	9.71169e+06	0	0	0	373638	5.24891e+07	1.91829e+07
23	Ceará	2006	NORDESTE	795.921	86228.7	21615.4	22313.7	5.67057e+06	1.25233e+06	96061.5	1.13519e+07	1.13933e+06	0	0	0	144.593	19728	16440	14027.8	6.75306e+06	529198	133895	1.71048e+07	4.97768e+06	45.1049	10727.6	5485.73	23700.5	4.30119e+06	2.051e+06	215086	4.87939e+07	2.24743e+07	532.927	47095.6	22528.9	0	0	0	506603	9.41391e+07	3.24899e+07
24	Rio Grande do Norte	2006	NORDESTE	658.863	71380	17893.2	1585.49	402921	88983.6	10646.3	1.25811e+06	126270	0	0	0	0.13797	18.8244	15.687	29064.9	1.3992e+07	1.09647e+06	23485.8	3.00025e+06	873107	0.14985	35.64	18.225	6404.58	1.16231e+06	554242	18788.9	4.26239e+06	1.96324e+06	4.499	397.584	190.19	22.6684	5470.67	1858.56	90662.2	2.41553e+07	4.7223e+06
25	Paraíba	2006	NORDESTE	1209	130981	32833.8	4209.04	1.06964e+06	236227	32673.9	3.86117e+06	387526	0	0	0	1.24173	169.42	141.183	70216	3.38024e+07	2.6489e+06	31960	4.08281e+06	1.18814e+06	149.091	35459.4	18132.7	5137.68	932392	444606	27239.4	6.17946e+06	2.84624e+06	0	0	0	4.29325	1036.11	352	172800	5.00956e+07	7.80311e+06
26	Pernambuco	2006	NORDESTE	50.9542	5520.29	1383.8	1747.4	444066	98070.4	94943.7	1.12198e+07	1.12607e+06	0	0	0	292.91	39964.2	33303.5	335203	1.61369e+08	1.26455e+07	54018.1	6.90067e+06	2.00817e+06	114.196	27160.1	13888.7	18151	3.29407e+06	1.57076e+06	65572.9	1.48757e+07	6.85169e+06	16.769	1481.9	708.89	0	0	0	570110	1.98177e+08	2.43496e+07
27	Alagoas	2006	NORDESTE	180.656	19571.9	4906.2	2714.46	689826	152345	10464.3	1.2366e+06	124112	0	0	0	5.79474	790.625	658.854	667754	3.21461e+08	2.51911e+07	44452.2	5.67866e+06	1.65255e+06	1584.93	376957	192762	27493.2	4.98949e+06	2.37921e+06	21709.7	4.925e+06	2.26844e+06	0	0	0	0	0	0	776360	3.39378e+08	3.1966e+07
28	Sergipe	2006	NORDESTE	0	0	0	2150.97	546626	120720	5624.82	664702	66712.8	0	0	0	0	0	0	13077.1	6.29539e+06	493333	7330.66	936473	272524	4723	1.12331e+06	574419	13227.3	2.40051e+06	1.14467e+06	27953.9	6.34154e+06	2920896	0	0	0	0	0	0	74087.8	1.83086e+07	5.59328e+06
29	Bahia	2006	NORDESTE	180986	1.96077e+07	4.91518e+06	2851.81	724732	160054	99213.4	1.17243e+07	1.17671e+06	62876.1	1.00749e+07	1.44097e+06	21003.7	2.86571e+06	2.38809e+06	55784.6	2.68551e+07	2.10448e+06	148286	1.89432e+07	5.51268e+06	4105.67	976484	499338	47388.7	8.60015e+06	4.10094e+06	233430	5.29552e+07	2.4391e+07	957715	8.46349e+07	4.04863e+07	0	0	0	1.81364e+06	2.37962e+08	8.71758e+07
31	Minas Gerais	2006	SUDESTE	7873.65	853018	213830	16712.7	4.24721e+06	937982	71830.8	8.48846e+06	851944	25.8694	4145.15	592.864	178775	2.43918e+07	2.03265e+07	391250	1.8835e+08	1.47599e+07	97638.9	1.24731e+07	3.62982e+06	2064.84	491098	251130	23468.3	4.25905e+06	2.03091e+06	689630	1.56448e+08	72059328	817392	7.22343e+07	3.45543e+07	4383.58	1.05791e+06	359406	2.30105e+06	4.73298e+08	1.49976e+08
32	Espírito Santo	2006	SUDESTE	0	0	0	499.654	126977	28042.5	20613.1	2.43591e+06	244480	2835.13	454283	64974.2	55787.2	7.61151e+06	6.34293e+06	74197.9	3.57194e+07	2.79912e+06	3702.93	473040	137660	105.564	25107.2	12838.9	10787	1.95764e+06	933491	6989.48	1.58561e+06	730330	0	0	0	0	0	0	175518	5.03895e+07	1.12939e+07
33	Rio de Janeiro	2006	SUDESTE	0	0	0	948.746	241105	53247.2	11169.9	1.31998e+06	132480	0.80842	129.536	18.527	1427.44	194757	162298	69915.9	3.3658e+07	2.63758e+06	2155.3	275334	80125.3	194.345	46222.7	23636.6	3666.12	665331	317260	2866	650172	299468	0	0	0	0	0	0	92344.5	3.7051e+07	3.70611e+06
35	São Paulo	2006	SUDESTE	9600.1	1.04006e+06	260717	4467.69	1.13538e+06	250744	125116	1.47853e+07	1.48392e+06	0	0	0	38567.4	5.26208e+06	4.38507e+06	4.67542e+06	2.25078e+09	1.76381e+08	45588.9	5.82386e+06	1.69481e+06	100225	2.38373e+07	1.21895e+07	35008.6	6.3534e+06	3.02959e+06	308016	6.98756e+07	3.21845e+07	390411	3.45013e+07	1.65042e+07	11549.2	2.78723e+06	946908	5.74397e+06	2.41618e+09	2.49311e+08
41	Paraná	2006	SUL	5086.98	551114	138151	11414.9	2.90088e+06	640649	28027.6	3.31211e+06	332419	0	0	0	23210.1	3.16675e+06	2.63896e+06	458008	2.20488e+08	1.72784e+07	153221	1.95736e+07	5.69614e+06	2324.62	552883	282724	69337.5	1.25835e+07	6.00036e+06	1.23907e+06	2.81092e+08	1.2947e+08	3.58227e+06	3.16571e+08	1.51436e+08	161201	3.89035e+07	1.32167e+07	5.73317e+06	8.99695e+08	3.27131e+08
42	Santa Catarina	2006	SUL	0	0	0	112008	2.84645e+07	6.28629e+06	128762	1.52162e+07	1.52717e+06	0	0	0	1.93158	263.542	219.618	2827.37	1.36112e+06	106663	58137	7.42686e+06	2.1613e+06	729.929	173605	88775.2	33194.7	6.0242e+06	2.87261e+06	553835	1.25641e+08	5.78701e+07	296472	2.61997e+07	1.2533e+07	16514.1	3.98543e+06	1.35398e+06	1.20248e+06	2.14493e+08	8.48002e+07
43	Rio Grande do Sul	2006	SUL	0	0	0	747325	1.89918e+08	4.19427e+07	16664.3	1.96927e+06	197645	0	0	0	1.10376	150.595	125.496	14131	6.80278e+06	533094	33738.3	4.30999e+06	1.25425e+06	980.139	233114	119206	32616.8	5.91934e+06	2.82261e+06	688861	1.56273e+08	7.19789e+07	3.24109e+06	2.8642e+08	1.37013e+08	173433	4.18555e+07	1.42196e+07	4.94884e+06	6.93702e+08	2.70082e+08
50	Mato Grosso do Sul	2006	CENTRO-OESTE	17730.2	1.92085e+06	481511	12289.8	3.1232e+06	689748	460.051	54365.6	5456.4	0	0	0	191.916	26184.7	21820.6	219291	1.05568e+08	8.27277e+06	4013.22	512678	149195	12.977	3086.42	1578.29	19423.4	3.52497e+06	1.68087e+06	292903	6.6447e+07	3.06053e+07	1.57848e+06	1.39493e+08	6.67283e+07	6812.36	1.64406e+06	558540	2.1516e+06	3.22317e+08	1.09195e+08
51	Mato Grosso	2006	CENTRO-OESTE	302975	3.28238e+07	8.2281e+06	42369	1.07672e+07	2.3779e+06	4586.7	542024	54400.2	18.1895	2914.56	416.858	907.705	123846	103205	152239	7.32888e+07	5.74321e+06	5347.18	683089	198787	9.21078	2190.67	1120.23	6025.51	1.09352e+06	521438	555377	1.25991e+08	5.80312e+07	4.71334e+06	4.16526e+08	1.99251e+08	0	0	0	5.7832e+06	6.61845e+08	2.74511e+08
52	Goiás	2006	CENTRO-OESTE	28845.8	3.1251e+06	783386	14512.5	3.68807e+06	814498	13570.4	1.60366e+06	160951	0	0	0	418.187	57056.8	47547.3	323625	1.55795e+08	1.22088e+07	30845.4	3.94042e+06	1.14671e+06	397.532	94548.2	48348.5	3833.85	695772	331775	397151	9.00964e+07	4.14982e+07	2.24305e+06	1.98222e+08	9.48222e+07	1733.96	418465	142166	3.05798e+06	4.57737e+08	1.52005e+08
53	Distrito Federal	2006	CENTRO-OESTE	1358.05	147129	36881.6	97.144	24687.2	5452.08	241.769	28570.5	2867.48	0	0	0	100.994	13779.5	11482.9	146.702	70623.5	5534.35	9103.29	1.16292e+06	338424	101.069	24038	12292.2	431.18	78251.1	37313.6	16451.9	3.73223e+06	1.71906e+06	45986.3	4.06389e+06	1.94402e+06	672.838	162380	55165.4	74691.3	9.5085e+06	4.16849e+06

## Sheet: DB_UtilityFE
STATES AND YEARS ANALIZED				COTTON								RICE								BANANA					COCOA					COFFE			SUGARCANE					BEANS					ORANGE						CASSAVA
CODST	STATE	YEAR	REGION	ALGPRHUM	ALGPRANI	ALGPRRES	ALGGEHUM	ALGGEANI	ALGGERES	ALGMEHUM	ALGMEANI	ARRPRHUM	ARRPRANI	ARRPRRES	ARRGEHUM	ARRGEANI	ARRGERES	ARRMEHUM	ARRMEANI	BANPRHUM	BANPRRES	BANGEHUM	BANGERES	BANMEHUM	CACPRHUM	CACPRRES	CACGEHUM	CACGERES	CACMEHUM	CAFPRHUM	CAFGEHUM	CAFMEHUM	CANPRHUM	CANPRRES	CANGEHUM	CANGERES	CANMEHUM	FEIPRHUM	FEIPRRES	FEIGEHUM	FEIGERES	FEIMEHUM	LARPRHUM	LARPRANI	LARGEHUM	LARGEANI	LARMEHUM	LARMEANI	MANPRHUM
11	Rondônia	1975	NORTE	0	10.4581	1.25862	337.98	601.202	330.189	318.2	303.397	5825.32	4004.83	5982.73	1.00823e+06	643181	2.20791e+06	935412	617384	270.987	6281.64	87942.8	686400	77716.9	0.388	0.42042	34.532	95.004	18.527	141.971	19370.3	16141.9	0	20.5608	855.431	5721.86	791.885	1599.37	678.345	119952	171019	84676.1	2.30214	2.89104	560.155	872.132	294.413	452.93	388.889
12	Acre	1975	NORTE	0	0	0	0	0	0	0	0	656.055	451.03	673.782	113548	72436	248658	105347	69530.6	153.018	3547.05	49658.6	387589	43884.4	0	0	0	0	0	4.96692	677.678	564.732	0	117.851	4903.2	32796.8	4538.96	955.245	405.152	71643.3	102144	50574	1.63076	2.04792	396.795	617.789	208.552	320.841	1204.87
13	Amazonas	1975	NORTE	0	0	0	0	0	0	0	0	143.327	98.5352	147.199	24806.5	15824.9	54323.6	23014.9	15190.1	398.862	9245.87	129442	1.01031e+06	114391	108.64	117.718	9668.96	26601.1	5187.56	13.659	1863.62	1553.01	0	152.043	6325.73	42311.9	5855.82	702.457	297.936	52684.3	75113.4	37190.6	15.3211	19.2404	3727.93	5804.19	1959.37	3014.33	8171.57
14	Roraima	1975	NORTE	0	0	0	0	0	0	0	0	178.996	123.057	183.832	30980.1	19763.2	67842.9	28742.6	18970.5	32.3852	750.709	10509.9	82030.6	9287.83	0	0	0	0	0	0.27594	37.6488	31.374	0	2.31644	96.3754	644.641	89.2161	124.184	52.6706	9313.8	13278.9	6574.74	2.32675	2.92196	566.144	881.457	297.561	457.773	106.334
15	Pará	1975	NORTE	0	22.3755	2.69286	723.12	1286.29	706.451	680.8	649.129	8695.65	5978.15	8930.62	1.50502e+06	960099	3.29582e+06	1.39632e+06	921590	770.168	17853	249941	1.95081e+06	220878	337.172	365.345	30008.3	82558.5	16100	47.0478	6419.12	5349.27	0	3170.31	131901	882263	122102	2215.87	939.824	166190	236942	117316	29.985	37.6555	7295.94	11359.4	3834.69	5899.35	15632.3
16	Amapá	1975	NORTE	0	0	0	0	0	0	0	0	37.8493	26.0209	38.8721	6550.85	4179	14345.6	6077.73	4011.38	83.6687	1939.49	27152.8	211930	23995.5	0.388	0.42042	34.532	95.004	18.527	0.96579	131.771	109.809	0	14.1858	590.2	3947.76	546.357	14.5839	6.18552	1093.79	1559.45	772.123	2.28798	2.87327	556.711	866.77	292.603	450.146	564.222
17	Tocantins	1975	NORTE	0	0	0	0	0	0	0	0	0	0	0	0	0	0	0	0	0	0	0	0	0	0	0	0	0	0	0	0	0	0	0	0	0	0	0	0	0	0	0	0	0	0	0	0	0	0
21	Maranhão	1975	NORDESTE	0	127.93	15.3962	4134.36	7354.24	4039.06	3892.4	3711.33	41474.9	28513.5	42595.6	7.17836e+06	4.57931e+06	1.57198e+07	6.65992e+06	4.39563e+06	610.323	14147.7	198067	1.54593e+06	175036	2.91	3.15315	258.99	712.53	138.952	11.3135	1543.6	1286.33	0	1346.29	56012.4	374659	51851.5	4845.61	2055.19	363421	518138	256544	115.567	145.13	28119.7	43781	14779.5	22737.1	8999.02
22	Piauí	1975	NORDESTE	0	546.255	65.741	17653.6	31402.3	17246.6	16620.4	15847.2	6193.56	4257.99	6360.92	1.07196e+06	683840	2.34748e+06	994543	656411	189.649	4396.18	61546.5	480375	54389.9	0	0	0	0	0	1.65564	225.893	188.244	0	3772.97	156974	1.04998e+06	145313	9730.99	4127.24	729824	1.04053e+06	515193	28.0921	35.2783	6835.35	10642.3	3592.61	5526.94	2176.25
23	Ceará	1975	NORDESTE	0	9206.31	1107.97	297525	529240	290666	280112	267081	3519.48	2419.6	3614.58	609141	388590	1.33395e+06	565147	373004	1817.23	42124.6	589744	4.60299e+06	521169	0.582	0.63063	51.798	142.506	27.7905	536.979	73264.6	61053.8	0	21690.6	902434	6.03625e+06	835396	21032.4	8920.55	1.57743e+06	2.24898e+06	1.11353e+06	29.6342	37.215	7210.59	11226.5	3789.83	5830.34	4586.61
24	Rio Grande do Norte	1975	NORDESTE	0	5305.92	638.56	171474	305019	167521	161438	153928	403.17	277.174	414.064	69779.4	44514.5	152809	64739.8	42729.1	126.96	2943.01	41202.1	321585	36411.1	0	0	0	0	0	0.41391	56.4732	47.061	0	10844.7	451192	3.01796e+06	417675	6685.61	2835.59	501421	714889	353960	3.77043	4.73495	917.42	1428.38	482.189	741.808	1258.13
25	Paraíba	1975	NORDESTE	0	5984.72	720.253	193411	344042	188953	182092	173621	998.694	686.589	1025.68	172851	110267	378525	160367	105844	483.946	11218.2	157054	1.22582e+06	138792	0	0	0	0	0	29.8015	4066.07	3388.39	0	36358.9	1.51271e+06	1.01183e+07	1.40034e+06	14088.3	5975.31	1.05662e+06	1.50645e+06	745882	88.5606	111.215	21548.5	33549.9	11325.7	17423.7	2752.76
26	Pernambuco	1975	NORDESTE	0	2723.73	327.798	88024.1	156578	85995	82872.6	79017.4	520.011	357.501	534.062	90001.9	57415.1	197094	83501.8	55112.2	1613.27	37396.5	523550	4.08635e+06	462672	0.776	0.84084	69.064	190.008	37.054	1196.61	163264	136053	0	271143	1.12809e+07	7.54561e+07	1.04429e+07	21942.6	9306.58	1.64569e+06	2.34631e+06	1.16172e+06	95.8122	120.322	23313	36297.1	12253.1	18850.4	6936.5
27	Alagoas	1975	NORDESTE	0	2067.55	248.827	66817.9	118856	65277.6	62907.4	59981	710.093	488.18	729.28	122901	78402.3	269139	114024	75257.6	442.82	10264.8	143707	1.12165e+06	126997	0	0	0	0	0	16.5564	2258.93	1882.44	0	221205	9.20323e+06	6.1559e+07	8.51956e+06	12864.3	5456.19	964824	1.37557e+06	681082	13.7107	17.218	3336.07	5194.09	1753.41	2697.48	1491.89
28	Sergipe	1975	NORDESTE	0	454.564	54.7061	14690.3	26131.3	14351.7	13830.6	13187.2	1024.39	704.255	1052.07	177298	113104	388264	164493	108568	89.2466	2068.79	28963	226059	25595.2	0	0	0	0	0	4.41504	602.381	501.984	0	14547.2	605235	4.04833e+06	560274	2388.44	1013.02	179133	255395	126453	203.317	255.327	49470.9	77023.6	26001.5	40001.2	2193.94
29	Bahia	1975	NORDESTE	0	5549.37	667.86	179342	319015	175207	168846	160991	1000.83	688.056	1027.87	173220	110503	379333	160710	106070	2422.15	56146.8	786055	6.13522e+06	694653	56258.6	60959.4	5.00702e+06	1.37752e+07	2.68635e+06	2297.61	313483	261236	0	14829.1	616962	4.12677e+06	571131	36166.7	15339.5	2.7125e+06	3.86729e+06	1.91479e+06	323.853	406.698	78799.7	122687	41416.5	63716	21736.1
31	Minas Gerais	1975	SUDESTE	0	13280.4	1598.27	429187	763443	419294	404070	385272	26150.8	17978.4	26857.5	4.52611e+06	2.88735e+06	9.91168e+06	4.19922e+06	2.77154e+06	1597.7	37035.6	518498	4.04691e+06	458207	1.94	2.1021	172.66	475.02	92.635	40402.7	5.51248e+06	4.59373e+06	0	71514.1	2.97534e+06	1.99016e+07	2.75431e+06	41242.1	17492.2	3.09316e+06	4.41e+06	2.1835e+06	521.333	654.695	126850	197500	66671.6	102569	3700.1
32	Espírito Santo	1975	SUDESTE	0	102.392	12.3228	3309.06	5886.19	3232.78	3115.4	2970.47	1738.38	1195.11	1785.35	300873	191937	658880	279144	184238	1251.53	29011.3	406158	3.17009e+06	358930	1837.57	1991.11	163544	449939	87743.9	14967.5	2.04215e+06	1.70179e+06	0	9565.24	397961	2.6619e+06	368398	4906.59	2081.05	367995	524660	259773	85.5975	107.494	20827.5	32427.4	10946.8	16840.8	1809.05
33	Rio de Janeiro	1975	SUDESTE	0	34.2929	4.12711	1108.26	1971.38	1082.71	1043.4	994.861	3098.27	2130.02	3181.98	536238	342084	1.1743e+06	497510	328363	1991.81	46171.5	646400	5.0452e+06	571237	0.582	0.63063	51.798	142.506	27.7905	543.464	74149.3	61791.1	0	126723	5.27228e+06	3.52655e+07	4.88063e+06	1564.23	663.444	117317	167263	82816	1200.07	1507.06	292001	454630	153473	236106	1353.58
35	São Paulo	1975	SUDESTE	0	96004.6	11554	3.10262e+06	5.51898e+06	3.0311e+06	2.92105e+06	2.78516e+06	24302.9	16708	24959.6	4.20628e+06	2.68332e+06	9.21129e+06	3.90249e+06	2.57569e+06	2862.72	66359.5	929033	7.25117e+06	821006	2.716	2.94294	241.724	665.028	129.689	117237	1.59956e+07	1.33297e+07	0	661735	2.75314e+07	1.84154e+08	2.54863e+07	20623.8	8747.26	1.54679e+06	2.2053e+06	1.0919e+06	10269.5	12896.5	2.49876e+06	3.89044e+06	1.31333e+06	2.02045e+06	1955.07
41	Paraná	1975	SUL	0	66378.2	7988.53	2.14517e+06	3.81586e+06	2.09572e+06	2.01963e+06	1.92568e+06	32075.8	22051.7	32942.5	5.55159e+06	3.54154e+06	1.21574e+07	5.15064e+06	3.39949e+06	294.63	6829.71	95615.9	746289	84497.7	0	0	0	0	0	164876	2.24954e+07	1.87462e+07	0	32344.7	1.3457e+06	9.00118e+06	1.24573e+06	80104.2	33974.9	6.00782e+06	8.5655e+06	4.241e+06	145.566	182.804	35419.1	55145.7	18616	28639.2	3389.31
42	Santa Catarina	1975	SUL	0	0	0	0	0	0	0	0	9631.82	6621.75	9892.08	1.66705e+06	1.06346e+06	3.65065e+06	1.54665e+06	1.02081e+06	1039.99	24107.6	337506	2.63426e+06	298261	0	0	0	0	0	126.381	17243.2	14369.3	0	9612.15	399913	2.67496e+06	370205	21042.3	8924.77	1.57818e+06	2.25005e+06	1.11406e+06	154.69	194.261	37639.1	58602.1	19782.8	30434.2	9730.15
43	Rio Grande do Sul	1975	SUL	0	0.243212	0.0292703	7.86	13.9815	7.67881	7.4	7.05576	87026.4	59829.5	89377.9	1.50623e+07	9.6087e+06	3.29847e+07	1.39744e+07	9.2233e+06	435.077	10085.4	141195	1.10204e+06	124777	0	0	0	0	0	3.72519	508.259	423.549	0	11929.1	496309	3.31974e+06	459440	24603.5	10435.2	1.84526e+06	2.63084e+06	1.30259e+06	662.524	832.004	161205	250988	84728.2	130347	12073.9
50	Mato Grosso do Sul	1975	CENTRO-OESTE	0	7731.72	930.502	249869	444470	244109	235246	224302	27155	18668.7	27888.8	4.6999e+06	2.99822e+06	1.02923e+07	4.36047e+06	2.87796e+06	133.703	3099.33	43390.5	338666	38345.1	0	0	0	0	0	1821.2	248482	207068	0	200.497	8341.65	55796.1	7721.99	2152.89	913.114	161467	230208	113982	36.1924	45.4507	8806.3	13711	4628.53	7120.61	720.677
51	Mato Grosso	1975	CENTRO-OESTE	0	647.188	77.8882	20915.5	37204.6	20433.3	19691.4	18775.4	16498.4	11342.4	16944.2	2.85549e+06	1.82161e+06	6.25321e+06	2.64926e+06	1.74854e+06	244.013	5656.37	79189.1	618076	69981	0	0	0	0	0	430.328	58713.3	48927.8	0	1360.35	56597.1	378570	52392.7	4594.15	1948.53	344561	491250	243230	15.8547	19.9104	3857.75	6006.31	2027.6	3119.3	430.017
52	Goiás	1975	CENTRO-OESTE	0	11462.6	1379.51	370442	658946	361902	348762	332538	51036.1	35086.7	52415.2	8.83318e+06	5.63497e+06	1.93437e+07	8.19522e+06	5.40895e+06	1131.4	26226.6	367171	2.8658e+06	324477	0.582	0.63063	51.798	142.506	27.7905	515.456	70328	58606.6	0	6483.9	269762	1.8044e+06	249723	16855	7148.77	1.26412e+06	1.8023e+06	892363	53.6907	67.4253	13064	20340	6866.33	10563.3	723.971
53	Distrito Federal	1975	CENTRO-OESTE	0	0	0	0	0	0	0	0	53.2024	36.576	54.64	9208.12	5874.15	20164.8	8543.09	5638.54	50.451	1169.48	16372.8	127791	14469	0	0	0	0	0	3.17331	432.961	360.801	0	65.2816	2716.03	18167.2	2514.27	116.671	49.4842	8750.33	12475.6	6176.98	4.93596	6.19863	1201.02	1869.92	631.245	971.119	27.5879
11	Rondônia	1985	NORTE	0	72.9637	8.78108	2358	4194.44	2303.64	2220	2116.73	10432.6	7172.24	10714.4	1.80563e+06	1.15187e+06	3.95414e+06	1.67523e+06	1.10567e+06	207.715	4814.96	67409.3	526135	59571	1903.92	2063	169449	466185	90912	8961.98	1.22276e+06	1.01896e+06	0	85.8807	3573.06	23899.7	3307.63	7554.23	3204.01	566567	807770	399948	10.5667	13.2697	2571.08	4003.04	1351.34	2078.93	679.628
12	Acre	1985	NORTE	0	0.243212	0.0292703	7.86	13.9815	7.67881	7.4	7.05576	894.005	614.617	918.162	154732	98708.3	338845	143557	94749.2	201.221	4664.43	65301.9	509686	57708.7	16.49	17.8679	1467.61	4037.67	787.398	57.6715	7868.6	6557.17	0	38.1352	1586.61	10612.6	1468.75	1189.47	504.495	89210.3	127190	62974.8	5.99257	7.52553	1458.11	2270.2	766.371	1179	623.406
13	Amazonas	1985	NORTE	0	2.91855	0.351243	94.32	167.777	92.1458	88.8	84.6691	333.362	229.182	342.37	57697.2	36806.9	126351	53530.2	35330.6	1236.05	28652.4	401133	3.13087e+06	354489	416.712	451.531	37087.4	102034	19898	48.4275	6607.36	5506.14	0	135.177	5624.02	37618.3	5206.24	1093.35	463.727	82001.2	116911	57885.8	28.0084	35.1732	6814.99	10610.6	3581.91	5510.47	7279.01
14	Roraima	1985	NORTE	0	0	0	0	0	0	0	0	1054.17	724.728	1082.65	182452	116392	399551	169275	111724	54.0308	1252.47	17534.5	136858	15495.6	0.582	0.63063	51.798	142.506	27.7905	2.34549	320.015	266.679	0	12.1948	507.365	3393.69	469.675	118.66	50.3276	8899.49	12688.2	6282.27	4.63197	5.81687	1127.05	1754.75	592.368	911.309	157.834
15	Pará	1985	NORTE	0	803.816	96.7382	25977.3	46208.7	25378.5	24457	23319.3	14541.6	9997.14	14934.5	2.51681e+06	1.60555e+06	5.51154e+06	2.33504e+06	1.54116e+06	1256.28	29121.3	407698	3.18211e+06	360291	4331.83	4693.78	385533	1.06067e+06	206845	461.51	62967.6	52473	0	2714.34	112930	755370	104541	9806.56	4159.29	735492	1.04861e+06	519194	33.7604	42.3966	8214.55	12789.6	4317.51	6642.13	17965.8
16	Amapá	1985	NORTE	0	0	0	0	0	0	0	0	17.0229	11.703	17.4829	2946.28	1879.52	6452.02	2733.49	1804.14	39.0454	905.096	12671.3	98900.7	11197.9	2.91	3.15315	258.99	712.53	138.952	1.79361	244.717	203.931	0	28.0845	1168.45	7815.61	1081.65	24.3065	10.3092	1822.99	2599.08	1286.87	1.22891	1.54328	299.019	465.557	157.162	241.781	354.566
17	Tocantins	1985	NORTE	0	53.5067	6.43946	1729.2	3075.92	1689.34	1628	1552.27	18467.1	12695.9	18966.1	3.19623e+06	2.03898e+06	6.99939e+06	2.96539e+06	1.95719e+06	683.169	15836.3	221708	1.73045e+06	195928	9.118	9.87987	811.502	2232.59	435.385	14.6248	1995.39	1662.82	0	2372.71	98716.3	660299	91383.1	1548.32	656.696	116124	165561	81973.7	12.107	15.2041	2945.87	4586.56	1548.32	2381.97	487.998
21	Maranhão	1985	NORDESTE	0	758.579	91.294	24515.3	43608.1	23950.2	23080.6	22006.9	36148.1	24851.3	37124.8	6.2564e+06	3.99116e+06	1.37008e+07	5.80455e+06	3.83107e+06	733.703	17007.7	238108	1.85845e+06	210421	3.88	4.2042	345.32	950.04	185.27	16.9703	2315.4	1929.5	0	15197.1	632275	4.2292e+06	585306	6251.63	2651.53	468872	668483	330983	62.5786	78.5868	15226.6	23707	8002.98	12311.9	7890.28
22	Piauí	1985	NORDESTE	0	3615.35	435.103	116839	207834	114146	110001	104884	7116.88	4892.76	7309.19	1.23177e+06	785785	2.69744e+06	1.14281e+06	754267	110.143	2553.18	35744.5	278988	31588.2	0	0	0	0	0	1.3797	188.244	156.87	0	5997.73	249535	1.6691e+06	230998	11712	4967.44	878398	1.25235e+06	620073	21.0448	26.4282	5120.6	7972.51	2691.35	4140.42	2084.3
23	Ceará	1985	NORDESTE	0	30048.9	3616.34	971103	1.72741e+06	948717	914270	871739	4803.06	3302.04	4932.85	831299	530313	1.82046e+06	771261	509042	1405.97	32591.2	456276	3.56127e+06	403221	0	0	0	0	0	524.838	71608	59673.3	0	25751.1	1.07137e+06	7.16624e+06	991783	19629.5	8325.52	1.47221e+06	2.09897e+06	1.03925e+06	15.2005	19.0889	3698.58	5758.49	1943.94	2990.6	3267.82
24	Rio Grande do Norte	1985	NORDESTE	0	6485.98	780.579	209610	372857	204779	197343	188163	478.219	328.769	491.141	82768.7	52800.8	181254	76790.9	50683	158.18	3666.7	51333.7	400664	45364.7	0	0	0	0	0	3.03534	414.137	345.114	0	48742.3	2.02792e+06	1.35645e+07	1.87728e+06	6863.27	2910.94	514745	733886	363366	3.79013	4.75968	922.211	1435.84	484.707	745.682	2396.31
25	Paraíba	1985	NORDESTE	0	8814.01	1060.75	284846	506688	278280	268176	255701	1251.16	860.158	1284.97	216547	138142	474215	200908	132602	1277.18	29605.7	414479	3.23504e+06	366284	0	0	0	0	0	18.6259	2541.29	2117.74	0	106774	4.44233e+06	2.97141e+07	4.11233e+06	13626.4	5779.43	1.02198e+06	1.45707e+06	721432	45.4243	57.0442	11052.6	17208.3	5809.17	8936.93	1906.39
26	Pernambuco	1985	NORDESTE	0	3784.38	455.445	122302	217551	119482	115144	109788	1301.86	895.012	1337.04	225322	143740	493430	209049	137975	3095.57	71757.3	1.0046e+06	7.84099e+06	887787	0.97	1.05105	86.33	237.51	46.3175	1011.73	138039	115033	0	454943	1.89279e+07	1.26606e+08	1.75218e+07	21395.7	9074.63	1.60468e+06	2.28783e+06	1.13276e+06	60.2236	75.6293	14653.6	22814.8	7701.8	11848.6	6711.76
27	Alagoas	1985	NORDESTE	0	6635.56	798.581	214444	381456	209501	201894	192502	828.511	569.591	850.898	143396	91477	314022	133040	87807.9	420.674	9751.49	136521	1.06555e+06	120646	0.194	0.21021	17.266	47.502	9.2635	12.2793	1675.37	1396.14	0	475603	1.97874e+07	1.32355e+08	1.83175e+07	8725.14	3700.63	654386	932975	461940	15.918	19.99	3873.17	6030.32	2035.71	3131.77	1461.03
28	Sergipe	1985	NORDESTE	0	2222.47	267.472	71824.7	127762	70169	67621.2	64475.5	1058.3	727.566	1086.89	183167	116848	401115	169938	112161	132.371	3068.45	42958.2	335292	37963.1	0	0	0	0	0	1.93158	263.542	219.618	0	27018.2	1.12409e+06	7.51889e+06	1.04059e+06	2369.66	1005.05	177725	253387	125458	787.713	989.217	191666	298414	100738	154977	2923.63
29	Bahia	1985	NORDESTE	0	34867.9	4196.3	1.12684e+06	2.00444e+06	1.10087e+06	1.06089e+06	1.01154e+06	2780.91	1911.84	2856.05	481311	307044	1.05402e+06	446549	294728	3030.3	70244.3	983419	7.67566e+06	869068	82443.4	89332.1	7.33746e+06	2.01867e+07	3.93667e+06	14636.8	1.99702e+06	1.66419e+06	0	38860.1	1.61677e+06	1.08143e+07	1.49667e+06	71168.3	30184.9	5.33762e+06	7.60999e+06	3.7679e+06	511.525	642.378	124464	193784	65417.3	100639	20521.8
31	Minas Gerais	1985	SUDESTE	0	38088.2	4583.87	1.23092e+06	2.18956e+06	1.20254e+06	1158877	1.10497e+06	30101.2	20694.2	30914.5	5.20982e+06	3.32351e+06	1.14089e+07	4.83355e+06	3.19021e+06	2139.17	49587.3	694221	5.41845e+06	613498	2.716	2.94294	241.724	665.028	129.689	185227	2.52721e+07	2.106e+07	0	214838	8.93832e+06	5.97871e+07	8.27433e+06	47096.2	19975.1	3.53222e+06	5.03598e+06	2.49344e+06	1065.37	1337.9	259224	403599	136246	209604	4362.45
32	Espírito Santo	1985	SUDESTE	0	8.26921	0.995189	267.24	475.369	261.08	251.6	239.896	3150.22	2165.73	3235.34	545230	347820	1.19399e+06	505852	333869	1937.53	44913.2	628784	4.90771e+06	555670	2348.18	2544.38	208988	574964	112125	66065.8	9.01391e+06	7.51159e+06	0	46149.7	1.92006e+06	1.2843e+07	1.77742e+06	9665.36	4099.41	724902	1.03351e+06	511719	79.9225	100.367	19446.7	30277.5	10221	15724.2	3186.16
33	Rio de Janeiro	1985	SUDESTE	0	0	0	0	0	0	0	0	3951.92	2716.89	4058.7	683986	436336	1.49785e+06	634587	418835	2335.9	54147.5	758064	5.91675e+06	669917	0.776	0.84084	69.064	190.008	37.054	2384.4	325323	271103	0	153744	6.39649e+06	4.27852e+07	5.92132e+06	2079.53	881.999	155965	222363	110098	1146.46	1439.74	278957	434321	146618	225559	1261.21
35	São Paulo	1985	SUDESTE	0	138880	16714	4.48823e+06	7.98372e+06	4.38477e+06	4.22556e+06	4.02899e+06	14800.9	10175.4	15200.8	2.56169e+06	1.63418e+06	5.60981e+06	2.37668e+06	1.56864e+06	3405.19	78934.4	1.10508e+06	8.62523e+06	976583	25.22	27.3273	2244.58	6175.26	1204.26	144672	1.97389e+07	1.6449e+07	0	2.39304e+06	9.95621e+07	6.65956e+08	9.2166e+07	40814.3	17310.7	3.06108e+06	4.36426e+06	2.16086e+06	31154.3	39123.9	7.58046e+06	1.18024e+07	3.98423e+06	6.12941e+06	3488.67
41	Paraná	1985	SUL	0	205923	24782.6	6.65492e+06	1.18378e+07	6.50151e+06	6.26545e+06	5.97398e+06	8663.84	5956.27	8897.94	1.49951e+06	956586	3.28376e+06	1.39121e+06	918217	738.449	17117.7	239648	1.87047e+06	211782	0	0	0	0	0	78530.6	1.07146e+07	8.92882e+06	0	198601	8.26279e+06	5.52686e+07	7.64898e+06	94469.6	40067.7	7.08522e+06	1.01016e+07	5.00155e+06	287.773	361.388	70020.8	109019	36802.4	56617.5	9093.7
42	Santa Catarina	1985	SUL	0	3.8914	0.468324	125.76	223.703	122.861	118.4	112.892	15196.9	10447.7	15607.6	2.63024e+06	1.67791e+06	5.75993e+06	2.44028e+06	1.61061e+06	2186.29	50679.6	709513	5.5378e+06	627012	0	0	0	0	0	81.6782	11144	9286.7	0	17379.4	723071	4.83651e+06	669357	54797.9	23241.6	4.10984e+06	5.85951e+06	2.90119e+06	200.091	251.277	48686.1	75801.8	25589.1	39366.7	8628.59
43	Rio Grande do Sul	1985	SUL	0	0	0	0	0	0	0	0	164074	112799	168508	2.83975e+07	1.81157e+07	6.21873e+07	2.63465e+07	1.7389e+07	708.561	16424.9	229948	1.79476e+06	203210	0	0	0	0	0	3.44925	470.61	392.175	0	20020.5	832952	5.57149e+06	771076	29076.5	12332.3	2.18074e+06	3.10914e+06	1.53941e+06	734.648	922.577	178754	278311	93951.8	144537	11982.3
50	Mato Grosso do Sul	1985	CENTRO-OESTE	0	22005.6	2648.34	711165	1.26503e+06	694771	669545	638398	10916.3	7504.84	11211.3	1.88937e+06	1.20529e+06	4.1375e+06	1.75291e+06	1.15694e+06	145.941	3383.01	47362.1	369665	41854.9	0.194	0.21021	17.266	47.502	9.2635	875.282	119422	99518.3	0	46981.6	1.95467e+06	1.30745e+07	1.80946e+06	5377.48	2280.77	403311	575011	284703	25.6441	32.2041	6239.71	9714.91	3279.55	5045.31	1291.86
51	Mato Grosso	1985	CENTRO-OESTE	0	2913.2	350.599	94147.1	167470	91976.8	88637.2	84513.8	28245.3	19418.3	29008.5	4.88861e+06	3.1186e+06	1.07055e+07	4.53554e+06	2.99352e+06	907.701	21041.1	294575	2.29918e+06	260322	201.566	218.408	17939.4	49354.6	9624.78	4844.95	661038	550865	0	20797.1	865261	5.7876e+06	800984	4929.35	2090.71	369702	527093	260977	19.5869	24.5975	4765.88	7420.23	2504.91	3853.6	975.391
52	Goiás	1985	CENTRO-OESTE	0	23835.3	2868.54	770296	1.37021e+06	752539	725215	691478	35775.1	24594.9	36741.7	6.19184e+06	3.94997e+06	1.35594e+07	5.74465e+06	3.79154e+06	779.908	18078.8	253102	1.97548e+06	223672	0	0	0	0	0	1924.13	262525	218771	0	84985.6	3.53582e+06	2.36506e+07	3.27316e+06	22468.7	9529.73	1.68515e+06	2.40257e+06	1.18957e+06	97.4264	122.349	23705.7	36908.6	12459.6	19168	530.573
53	Distrito Federal	1985	CENTRO-OESTE	0	0.243212	0.0292703	7.86	13.9815	7.67881	7.4	7.05576	436.845	300.325	448.648	75607.7	48232.6	165573	70147.1	46298	31.8024	737.2	10320.8	80554.5	9120.69	0	0	0	0	0	101.96	13911.2	11592.7	0	93.9978	3910.77	26158.6	3620.26	194.452	82.4736	14583.9	20792.6	10295	4.7212	5.92892	1148.76	1788.56	603.779	928.864	24.2738
11	Rondônia	1995	NORTE	0	518.042	62.3457	16741.8	29780.5	16355.9	15762	15028.8	4065.84	2795.21	4175.7	703702	448914	1.54103e+06	652879	430909	176.162	4083.55	57169.6	446213	50522	699.176	757.597	62226.7	171197	33385.7	10888.3	1.48558e+06	1.23799e+06	0	440.833	18340.8	122679	16978.3	10591	4492	794325	1.13249e+06	560725	31.7745	39.9028	7731.36	12037.3	4063.55	6251.43	523.72
12	Acre	1995	NORTE	0	5.83709	0.702486	188.64	335.555	184.292	177.6	169.338	924.804	635.791	949.793	160062	102109	350519	148502	98013.3	286.971	6652.17	93130.2	726888	82301.1	3.104	3.36336	276.256	760.032	148.216	49.8072	6795.61	5663.01	0	54.3886	2262.83	15135.7	2094.74	1186.38	503.183	88978.3	126859	62811	13.4848	16.9344	3281.12	5108.53	1724.53	2653.05	1220.46
13	Amazonas	1995	NORTE	0	3.8914	0.468324	125.76	223.703	122.861	118.4	112.892	298.203	205.011	306.26	51612	32925	113025	47884.5	31604.4	1408.55	32651	457113	3.5678e+06	403961	191.672	207.687	17058.8	46932	9152.34	38.2177	5214.36	4345.3	0	163.625	6807.61	45535.1	6301.9	870.393	369.163	65279.5	93070.7	46081.7	37.6176	47.2405	9153.09	14250.9	4810.79	7401.01	8246.98
14	Roraima	1995	NORTE	0	3.64818	0.439054	117.9	209.722	115.182	111	105.836	1415.64	973.234	1453.89	245015	156303	536555	227319	150033	163.591	3792.14	53089.9	414371	46916.7	1.164	1.26126	103.596	285.012	55.581	4.96692	677.678	564.732	0	11.1228	462.761	3095.34	428.385	123.963	52.5769	9297.23	13255.3	6563.04	4.47504	5.6198	1088.87	1695.31	572.299	880.436	246.805
15	Pará	1995	NORTE	0	249.536	30.0313	8064.36	14345	7878.46	7592.4	7239.2	9163.9	6300.06	9411.52	1.58606e+06	1.0118e+06	3.4733e+06	1.47151e+06	971216	881.976	20444.7	286226	2.23402e+06	252944	2921.83	3165.97	260043	715428	139518	885.078	120759	100632	0	1064.3	44280.1	296183	40990.7	5635.13	2390.05	422634	602561	298344	261.229	328.054	63562.1	98962.8	33407.7	51395.1	13354.7
16	Amapá	1995	NORTE	0	0	0	0	0	0	0	0	25.4184	17.4748	26.1053	4399.34	2806.48	9634.08	4081.61	2693.92	34.3	795.095	11131.3	86880.8	9836.98	4.656	5.04504	414.384	1140.05	222.324	2.7594	376.488	313.74	0	47.3435	1969.72	13175.2	1823.4	32.9242	13.9643	2469.32	3520.57	1743.13	12.4682	15.6577	3033.76	4723.41	1594.52	2453.04	218.151
17	Tocantins	1995	NORTE	0	48.8857	5.88332	1579.86	2810.27	1543.44	1487.4	1418.21	12114.8	8328.74	12442.1	2.09679e+06	1.33761e+06	4.59173e+06	1.94535e+06	1.28396e+06	291.883	6766.03	94724.3	739330	83709.8	6.014	6.51651	535.246	1472.56	287.169	1.3797	188.244	156.87	0	1717.1	71439.7	477850	66132.7	424.259	179.942	31819.4	45365.8	22461.8	9.76301	12.2605	2375.53	3698.58	1248.56	1920.81	298.657
21	Maranhão	1995	NORDESTE	0	456.023	54.8818	14737.5	26215.2	14397.8	13875	13229.5	26033.3	17897.5	26736.7	4.50576e+06	2.87437e+06	9.86711e+06	4.18034e+06	2.75908e+06	807.465	18717.5	262045	2.04528e+06	231575	0.388	0.42042	34.532	95.004	18.527	7.45038	1016.52	847.098	0	15875.5	660497	4.41797e+06	611432	4378.48	1857.06	328386	468189	231812	34.7197	43.6014	8447.99	13153.1	4440.2	6830.88	5716.3
22	Piauí	1995	NORDESTE	0	1320.89	158.967	42687.7	75933.3	41703.6	40189.4	38319.8	7452.89	5123.76	7654.27	1.28992e+06	822883	2.82479e+06	1.19676e+06	789878	149.771	3471.79	48605	379365	42953.2	0	0	0	0	0	0.82782	112.946	94.122	0	9618.77	400188	2.6768e+06	370460	11636.4	4935.39	872730	1.24427e+06	616072	17.8602	22.429	4345.73	6766.07	2284.08	3513.87	2107.97
23	Ceará	1995	NORDESTE	0	1379.26	165.992	44574.1	79288.8	43546.6	41965.4	40013.2	5174.09	3557.12	5313.9	895515	571278	1.96108e+06	830839	548364	2317.75	53726.8	752174	5.87078e+06	664712	0	0	0	0	0	390.869	53329.5	44441.3	0	19705	819825	5.48369e+06	758924	26949.3	11430.1	2.02119e+06	2.88167e+06	1.42679e+06	39.1985	49.2258	9537.75	14849.8	5012.97	7712.04	2645.13
24	Rio Grande do Norte	1995	NORDESTE	0	1551.21	186.686	50131.1	89173.7	48975.5	47197.2	45001.6	323.204	222.198	331.937	55939.1	35685.4	122501	51899.1	34254	180.325	4180.04	58520.5	456757	51715.8	0	0	0	0	0	2.48346	338.839	282.366	0	60946.1	2.53566e+06	1.69606e+07	2.34729e+06	6894.64	2924.25	517098	737241	365027	3.01906	3.79136	734.595	1143.73	386.097	593.979	1275.29
25	Paraíba	1995	NORDESTE	0	2070.47	249.178	66912.2	119024	65369.7	62996.2	60065.6	933.803	641.977	959.035	161620	103102	353930	149947	98967	1017.51	23586.5	330211	2.57732e+06	291814	0	0	0	0	0	8.55414	1167.11	972.594	0	167171	6.95516e+06	4.6522e+07	6.43849e+06	11806.3	5007.46	885474	1.26244e+06	625068	27.721	34.8123	6745.06	10501.7	3545.15	5453.93	1100.58
26	Pernambuco	1995	NORDESTE	0	359.711	43.2907	11624.9	20678.6	11357	10944.6	10435.5	596.916	410.372	613.045	103312	65906.3	226243	95850.9	63262.8	2740.17	63518.8	889263	6.94076e+06	785860	1.746	1.89189	155.394	427.518	83.3715	732.483	99938.7	83282.3	0	293275	1.22017e+07	8.16154e+07	1.12953e+07	25874.2	10974.1	1.94057e+06	2.76672e+06	1.36987e+06	47.2852	59.3812	11505.4	17913.3	6047.15	9303.05	2894.72
27	Alagoas	1995	NORDESTE	0	661.78	79.6444	21387.1	38043.5	20894.1	20135.4	19198.7	439.628	302.238	451.507	76089.4	48539.9	166627	70594	46593	342.5	7939.37	111151	867542	98226.5	0	0	0	0	0	5.79474	790.625	658.854	0	393332	1.63645e+07	1.0946e+08	1.51489e+07	14410.4	6111.95	1.08078e+06	1.5409e+06	762939	96.3685	121.02	23448.3	36507.8	12324.3	18959.9	1898.8
28	Sergipe	1995	NORDESTE	0	89.7453	10.8007	2900.34	5159.16	2833.48	2730.6	2603.57	256.921	176.63	263.863	44467.1	28367	97378.1	41255.6	27229.2	185.153	4291.97	60087.5	468987	53100.6	0	0	0	0	0	4.00113	545.908	454.923	0	12641.3	525938	3.51792e+06	486869	4350.2	1845.07	326265	465164	230315	1595.25	2003.33	388156	604339	204012	313856	1456.31
29	Bahia	1995	NORDESTE	0	10646.1	1281.25	344056	612010	336125	323920	308852	2719.91	1869.9	2793.41	470754	300309	1.0309e+06	436755	288264	1397.81	32402	453628	3.5406e+06	400881	41804.9	45297.9	3.72063e+06	1.02362e+07	1.99618e+06	13188.1	1.79937e+06	1.49947e+06	0	28394.1	1.18133e+06	7.90178e+06	1.09358e+06	58699.3	24896.3	4.40244e+06	6.27668e+06	3.10775e+06	981.669	1232.79	238859	371891	125542	193137	8501.49
31	Minas Gerais	1995	SUDESTE	0	11352.7	1366.28	366889	652626	358432	345417	329349	7754.62	5331.2	7964.15	1.34215e+06	856198	2.93915e+06	1.24521e+06	821856	2117.86	49093.3	687305	5.36446e+06	607386	9.7	10.5105	863.3	2375.1	463.175	207879	2.83627e+07	2.36356e+07	0	226148	9.40888e+06	6.29346e+07	8.70994e+06	45481.8	19290.4	3.41114e+06	4.86335e+06	2.40797e+06	1961.65	2463.46	477308	743143	250869	385942	3045.18
32	Espírito Santo	1995	SUDESTE	0	0.486424	0.0585405	15.72	27.9629	15.3576	14.8	14.1115	786.162	540.476	807.405	136067	86801.3	297971	126240	83319.7	1126.74	26118.5	365658	2.85399e+06	323140	1196.01	1295.94	106445	292850	57109.5	91850.4	1.25319e+07	1.04433e+07	0	34132.1	1.42006e+06	9.49861e+06	1.31457e+06	4683.86	1986.58	351289	500843	247980	76.8542	96.5142	18700.1	29115.1	9828.64	15120.6	1519.08
33	Rio de Janeiro	1995	SUDESTE	0	5.10746	0.614676	165.06	293.61	161.255	155.4	148.171	800.124	550.075	821.744	138483	88342.8	303263	128481	84799.4	668.434	15494.7	216926	1.69312e+06	191702	0	0	0	0	0	1296.23	176855	147379	0	109310	4.54783e+06	3.04198e+07	4.20999e+06	1125.61	477.41	84420.8	120361	59593.8	155.62	195.43	37865.5	58954.6	19901.8	30617.3	395.576
35	São Paulo	1995	SUDESTE	0	36719.9	4419.2	1.18669e+06	2.11091e+06	1.15934e+06	1.11724e+06	1.06527e+06	2684.29	1845.41	2756.82	464588	296376	1.0174e+06	431035	284488	3210.38	74418.6	1.04186e+06	8.13179e+06	920712	29.1	31.5315	2589.9	7125.3	1389.53	47039.2	6.41795e+06	5.34829e+06	0	2.94376e+06	1.22475e+08	8.19217e+08	1.13377e+08	38442	16304.6	2.88315e+06	4.11059e+06	2.03526e+06	40805.8	51244.2	9.92883e+06	1.54587e+07	5.21852e+06	8.02826e+06	2031.27
41	Paraná	1995	SUL	0	65045.4	7828.13	2.1021e+06	3.73924e+06	2.05364e+06	1.97908e+06	1.88701e+06	6589.59	4530.26	6767.65	1.14051e+06	727565	2.49758e+06	1.05814e+06	698383	545.553	12646.3	177047	1.38187e+06	156460	6.596	7.14714	587.044	1615.07	314.959	15103.9	2.06074e+06	1.71729e+06	0	353063	1.46891e+07	9.82535e+07	1.35979e+07	84365.1	35782.1	6.32739e+06	9.02112e+06	4.46659e+06	617.67	775.676	150291	233995	78991.9	121523	14055.6
42	Santa Catarina	1995	SUL	0	0	0	0	0	0	0	0	23073.9	15863	23697.3	3.99355e+06	2.54762e+06	8.74544e+06	3.70513e+06	2.44543e+06	2064.49	47856.2	669986	5.22929e+06	592081	0	0	0	0	0	35.3203	4819.05	4015.87	0	9920.39	412737	2.76074e+06	382076	49338.8	20926.3	3.70041e+06	5.27578e+06	2.61217e+06	291.6	366.194	70951.9	110468	37291.8	57370.3	4214.38
43	Rio Grande do Sul	1995	SUL	0	3.64818	0.439054	117.9	209.722	115.182	111	105.836	215474	148135	221296	3.72935e+07	2.37907e+07	8.16687e+07	3.46001e+07	2.28365e+07	608.492	14105.2	197473	1.54129e+06	174511	0.194	0.21021	17.266	47.502	9.2635	2.06955	282.366	235.305	0	23686.8	985486	6.59177e+06	912278	23161.2	9823.45	1.73709e+06	2.47662e+06	1.22624e+06	706.997	887.854	172026	267836	90415.7	139097	8044.38
50	Mato Grosso do Sul	1995	CENTRO-OESTE	0	18656.6	2245.29	602933	1.0725e+06	589034	567647	541240	7532.48	5178.48	7736.02	1.3037e+06	831672	2.85496e+06	1.20954e+06	798314	125.961	2919.85	40877.9	319055	36124.6	0.582	0.63063	51.798	142.506	27.7905	163.908	22363.4	18636.2	0	98790.2	4.11016e+06	2.74922e+07	3.80483e+06	2787.07	1182.09	209030	298020	147557	22.9703	28.8463	5589.12	8701.97	2937.6	4519.25	2390.71
51	Mato Grosso	1995	CENTRO-OESTE	0	11314.5	1361.68	365655	650431	357226	344255	328241	27288.8	18760.7	28026.2	4.72307e+06	3.013e+06	1.0343e+07	4.38195e+06	2.89215e+06	754.766	17495.9	244943	1.9118e+06	216461	89.822	97.3272	7994.16	21993.4	4289	1275.95	174088	145073	0	158694	6.60243e+06	4.41627e+07	6.11196e+06	2581.13	1094.74	193585	275999	136654	23.0263	28.9166	5602.74	8723.18	2944.76	4530.27	427.299
52	Goiás	1995	CENTRO-OESTE	0	35559.1	4279.49	1.14918e+06	2.04417e+06	1.12269e+06	1.08192e+06	1.03159e+06	9328.61	6413.3	9580.68	1.61457e+06	1.02998e+06	3.53573e+06	1.49796e+06	988672	818.704	18978.1	265693	2.07375e+06	234798	0	0	0	0	0	501.521	68426.7	57022.2	0	127481	5.30386e+06	3.54767e+07	4.90986e+06	18732.6	7945.11	1.40494e+06	2.00306e+06	991768	191.972	241.08	46710.4	72725.7	24550.6	37769.1	1086.55
53	Distrito Federal	1995	CENTRO-OESTE	0	0	0	0	0	0	0	0	24.1197	16.582	24.7714	4174.56	2663.09	9141.83	3873.06	2556.27	8.65825	200.704	2809.85	21931.1	2483.12	0	0	0	0	0	220.752	30119	25099.2	0	127.098	5287.9	35370	4895.09	1437.84	609.836	107838	153747	76124.3	19.3272	24.2713	4702.69	7321.85	2471.7	3802.51	16.4139
11	Rondônia	2006	NORTE	0	0	0	0	0	0	0	0	4349.15	2989.98	4466.67	752737	480195	1.64841e+06	698373	460935	66.7407	1547.09	21659.2	169052	19140.7	1154.69	1251.17	102767	282732	55136.4	10801	1.47367e+06	1.22806e+06	0	619.505	25774.5	172402	23859.8	6012.76	2550.21	450957	642942	318337	14.596	18.3299	3551.5	5529.5	1866.64	2871.68	902.12
12	Acre	2006	NORTE	0	0	0	0	0	0	0	0	2804.84	1928.29	2880.63	485453	309686	1.06309e+06	450393	297265	190.452	4414.8	61807.1	482409	54620.2	0	0	0	0	0	137.004	18692.6	15577.2	0	27.8165	1157.3	7741.02	1071.33	3169.12	1344.13	237684	338873	167785	6.13072	7.69902	1491.72	2322.54	784.039	1206.18	1936.23
13	Amazonas	2006	NORTE	0	0	0	0	0	0	0	0	302.145	207.721	310.31	52294.4	33360.3	114519	48517.6	32022.2	316.269	7331.32	102638	801100	90703.7	256.274	277.687	22808.4	62750.1	12237.1	61.2587	8358.03	6965.03	0	648.298	26972.4	180414	24968.7	1134.01	480.971	85050.6	121259	60038.4	28.8344	36.2105	7015.97	10923.5	3687.54	5672.98	3519.04
14	Roraima	2006	NORTE	0	0	0	0	0	0	0	0	3355.14	2306.62	3445.8	580697	370446	1.27166e+06	538758	355587	109.485	2537.93	35531	277322	31399.5	0	0	0	0	0	3.31128	451.786	376.488	0	6.47073	269.214	1800.73	249.215	43.9726	18.6503	3297.95	4701.97	2328.07	2.29614	2.88351	558.695	869.859	293.646	451.75	65.7045
15	Pará	2006	NORTE	0	0	0	0	0	0	0	0	12232.4	8409.61	12562.9	2.11714e+06	1.35059e+06	4.63631e+06	1.96424e+06	1.29642e+06	308.026	7140.23	99963.1	780219	88339.5	5594.96	6062.46	497951	1.36996e+06	267159	244.207	33319.2	27766	0	433.462	18034.2	120628	16694.5	9246.85	3921.9	693514	988761	489561	350.732	440.453	85339.9	132870	44854	69004.2	30070.1
16	Amapá	2006	NORTE	0	0	0	0	0	0	0	0	39.5656	27.2008	40.6346	6847.88	4368.49	14996.1	6353.31	4193.27	4.61153	106.898	1496.57	11680.9	1322.55	0.582	0.63063	51.798	142.506	27.7905	0.13797	18.8244	15.687	0	35.3975	1472.71	9850.76	1363.31	9.72259	4.12368	729.194	1039.63	514.749	12.9076	16.2095	3140.67	4889.86	1650.71	2539.49	158.723
17	Tocantins	2006	NORTE	0	0	0	0	0	0	0	0	10578.8	7272.79	10864.6	1.83095e+06	1.16802e+06	4.00957e+06	1.69871e+06	1.12117e+06	128.805	2985.77	41800.7	326258	36940.2	0	0	0	0	0	0	0	0	0	3235.52	134613	900409	124614	879.453	373.006	65958.9	94039.4	46561.3	4.73073	5.9409	1151.08	1792.17	604.999	930.741	470.167
21	Maranhão	2006	NORDESTE	0	22742.3	2737	734973	1.30738e+06	718030	691959	659770	50684.4	34844.8	52053.9	8.77229e+06	5.59613e+06	1.92104e+07	8.13874e+06	5.37167e+06	515.267	11944.2	167219	1.30515e+06	147775	0	0	0	0	0	0.41391	56.4732	47.061	0	14339.4	596589	3.99049e+06	552271	8629.24	3659.95	647193	922721	456863	7.84225	9.84837	1908.17	2970.92	1002.92	1542.91	10597.8
22	Piauí	2006	NORDESTE	0	50.5881	6.08822	1634.88	2908.14	1597.19	1539.2	1467.6	13878.7	9541.46	14253.8	2.40209e+06	1.53237e+06	5.26032e+06	2.22861e+06	1.47091e+06	345.049	7998.44	111978	873997	98957.3	0	0	0	0	0	0.13797	18.8244	15.687	0	10571.5	439826	2.94193e+06	407153	20282.4	8602.47	1.52118e+06	2.16879e+06	1.07382e+06	2.25768	2.83521	549.336	855.288	288.727	444.183	1985.87
23	Ceará	2006	NORDESTE	0	710.423	85.4984	22959.1	40839.8	22429.8	21615.4	20609.9	7798.91	5361.65	8009.65	1.34981e+06	861089	2.95594e+06	1.25233e+06	826551	3972.67	92088.8	1.28924e+06	1.00626e+07	1.13933e+06	0	0	0	0	0	144.593	19728	16440	0	13740.3	571665	3.82378e+06	529198	94018.6	39876.5	7.05139e+06	1.00534e+07	4.97768e+06	17.3653	21.8075	4225.3	6578.58	2220.79	3416.5	4166.09
24	Rio Grande do Norte	2006	NORDESTE	0	588.087	70.7755	19005.5	33807.1	18567.4	17893.2	17060.8	554.15	380.971	569.123	95910.5	61184.4	210034	88983.6	58730.3	440.283	10206	142884	1.11522e+06	126270	0	0	0	0	0	0.13797	18.8244	15.687	0	28469.3	1.18446e+06	7.92269e+06	1.09647e+06	16491.3	6994.51	1.23685e+06	1.7634e+06	873107	0.0576919	0.07245	14.0376	21.8558	7.37803	11.3505	1125.8
25	Paraíba	2006	NORDESTE	0	1079.13	129.872	34874.8	62035.7	34070.9	32833.8	31306.4	1471.11	1011.37	1510.87	254616	162428	557581	236227	155913	1351.24	31322.7	438517	3.42266e+06	387526	0	0	0	0	0	1.24173	169.42	141.183	0	68777.1	2.86147e+06	1.91399e+07	2.6489e+06	22441.7	9518.3	1.68313e+06	2.39968e+06	1.18814e+06	57.3996	72.0829	13966.4	21745	7340.65	11293	903.107
26	Pernambuco	2006	NORDESTE	0	45.4807	5.47354	1469.82	2614.53	1435.94	1383.8	1319.43	610.738	419.875	627.241	105705	67432.4	231482	98070.4	64727.7	3926.44	91017.2	1.27424e+06	9.94553e+06	1.12607e+06	0	0	0	0	0	292.91	39964.2	33303.5	0	328334	1.36603e+07	9.13717e+07	1.26455e+07	37930.5	16087.6	2.84479e+06	4.05589e+06	2.00817e+06	43.9651	55.2117	10697.6	16655.5	5622.55	8649.84	3190.6
27	Alagoas	2006	NORDESTE	0	161.25	19.4062	5211.18	9269.7	5091.05	4906.2	4677.97	948.738	652.245	974.374	164205	104751	359590	152345	100550	432.757	10031.6	140442	1.09616e+06	124112	0	0	0	0	0	5.79474	790.625	658.854	0	654071	2.72126e+07	1.82021e+08	2.51911e+07	31213.5	13238.7	2.34101e+06	3.33764e+06	1.65255e+06	610.196	766.289	148472	231164	78036	120052	4832.78
28	Sergipe	2006	NORDESTE	0	0	0	0	0	0	0	0	751.792	516.847	772.106	130118	83006.4	284944	120720	79677	232.617	5392.21	75490.8	589211	66712.8	0	0	0	0	0	0	0	0	0	12809.1	532922	3.56464e+06	493333	5147.45	2183.21	386059	550414	272524	1818.34	2283.49	442439	688854	232542	357747	2325.11
29	Bahia	2006	NORDESTE	0	161545	19441.7	5.22071e+06	9.28666e+06	5.10037e+06	4.91518e+06	4.68652e+06	996.746	685.25	1023.68	172514	110052	377786	160054	105638	4103.01	95110.4	1.33154e+06	1.03928e+07	1.17671e+06	30177.3	32698.8	2.68578e+06	7.38908e+06	1.44097e+06	21003.7	2.86571e+06	2.38809e+06	0	54641.4	2.27335e+06	1.52061e+07	2.10448e+06	104124	44162.4	7.80927e+06	1.11339e+07	5.51268e+06	1580.67	1985.02	384608	598815	202147	310987	8330.03
31	Minas Gerais	2006	SUDESTE	0	7027.86	845.794	227123	404008	221887	213830	203883	5841.32	4015.83	5999.16	1.011e+06	644948	2.21398e+06	937982	619080	2970.59	68860.2	964041	7.52441e+06	851944	12.416	13.4534	1105.02	3040.13	592.864	178775	2.43918e+07	2.03265e+07	0	383233	1.59444e+07	1.0665e+08	1.47599e+07	68560.2	29078.7	5.14201e+06	7.33111e+06	3.62982e+06	794.96	998.318	193429	301159	101665	156403	4125.28
32	Espírito Santo	2006	SUDESTE	0	0	0	0	0	0	0	0	174.636	120.06	179.355	30225.4	19281.8	66190.4	28042.5	18508.4	852.464	19760.6	276649	2.15926e+06	244480	1360.72	1474.41	121104	333179	64974.2	55787.2	7.61151e+06	6.34293e+06	0	72677.5	3.02374e+06	2.02254e+07	2.79912e+06	2600.13	1102.8	195010	278031	137660	40.642	51.0386	9888.99	15396.6	5197.58	7996.05	1896.15
33	Rio de Janeiro	2006	SUDESTE	0	0	0	0	0	0	0	0	331.599	227.97	340.559	57392.2	36612.3	125683	53247.2	35143.8	461.937	10708	149911	1.17007e+06	132480	0.388	0.42042	34.532	95.004	18.527	1427.44	194757	162298	0	68483.2	2.84924e+06	1.90581e+07	2.63758e+06	1513.41	641.888	113506	161828	80125.3	74.8225	93.9628	18205.8	28345.5	9568.82	14720.8	644.434
35	São Paulo	2006	SUDESTE	0	8568.85	1031.25	276924	492594	270540	260717	248588	1561.52	1073.52	1603.71	270263	172409	591846	250744	165494	5174.21	119941	1.67918e+06	1.31061e+07	1.48392e+06	0	0	0	0	0	38567.4	5.26208e+06	4.38507e+06	0	4.57961e+06	1.90535e+08	1.27446e+09	1.76381e+08	32011.6	13577.2	2.40087e+06	3.42299e+06	1.69481e+06	38586.3	48457.1	9.38881e+06	1.46179e+07	4.93469e+06	7.59161e+06	6153.85
41	Paraná	2006	SUL	0	4540.53	546.447	146738	261020	143356	138151	131724	3989.67	2742.85	4097.48	690520	440505	1.51216e+06	640649	422837	1159.09	26868.5	376159	2.93595e+06	332419	0	0	0	0	0	23210.1	3.16675e+06	2.63896e+06	0	448622	1.86649e+07	1.24847e+08	1.72784e+07	107589	45632.1	8.06917e+06	1.15044e+07	5.69614e+06	894.974	1123.92	217765	339048	114455	176080	12188.2
42	Santa Catarina	2006	SUL	0	0	0	0	0	0	0	0	39148.1	26913.8	40206	6.77564e+06	4.3224e+06	1.48379e+07	6.28629e+06	4.14903e+06	5325.01	123437	1.72812e+06	1.34881e+07	1.52717e+06	0	0	0	0	0	1.93158	263.542	219.618	0	2769.43	115222	770703	106663	40822.7	17314.3	3.0617e+06	4.36515e+06	2.1613e+06	281.021	352.909	68377.9	106461	35938.9	55289	5834.99
43	Rio Grande do Sul	2006	SUL	0	0	0	0	0	0	0	0	261200	179572	268258	4.52077e+07	2.88394e+07	9.89999e+07	4.19427e+07	2.76827e+07	689.158	15975.1	223651	1.74562e+06	197645	0	0	0	0	0	1.10376	150.595	125.496	0	13841.5	575873	3.85193e+06	533094	23690.4	10047.9	1.77678e+06	2.53321e+06	1.25425e+06	377.351	473.881	91816.8	142954	48258.2	74241.4	5733.42
50	Mato Grosso do Sul	2006	CENTRO-OESTE	0	15825.6	1904.59	511442	909759	499653	481511	459111	4295.44	2953.06	4411.5	743441	474265	1.62805e+06	689748	455242	19.0256	441.026	6174.35	48191.3	5456.4	0	0	0	0	0	191.916	26184.7	21820.6	0	214798	8.93664e+06	5.97759e+07	8.27277e+06	2818	1195.21	211350	301328	149195	4.99612	6.27417	1215.65	1892.71	638.938	982.953	3414.26
51	Mato Grosso	2006	CENTRO-OESTE	0	270429	32545.8	8.73958e+06	1.55461e+07	8.53812e+06	8.2281e+06	7.84534e+06	14808.5	10180.7	15208.6	2.56301e+06	1.63503e+06	5.61272e+06	2.3779e+06	1.56945e+06	189.685	4397.01	61558.1	480466	54400.2	8.73	9.45945	776.97	2137.59	416.858	907.705	123846	103205	0	149119	6.20409e+06	4.14982e+07	5.74321e+06	3754.69	1592.49	281602	401487	198787	3.54613	4.45326	862.842	1343.4	453.503	697.677	1059.17
52	Goiás	2006	CENTRO-OESTE	0	25747.2	3098.64	832083	1.48012e+06	812902	783386	746943	5072.32	3487.16	5209.38	877902	560042	1.92251e+06	814498	537579	561.211	13009.2	182129	1.42153e+06	160951	0	0	0	0	0	418.187	57056.8	47547.3	0	316994	1.31885e+07	8.82159e+07	1.22088e+07	21659.1	9186.34	1.62443e+06	2.31599e+06	1.14671e+06	153.049	192.2	37239.8	57980.4	19572.9	30111.4	673.918
53	Distrito Federal	2006	CENTRO-OESTE	0	1212.17	145.883	39174.2	69683.5	38271.2	36881.6	35165.9	33.9531	23.3423	34.8705	5876.5	3748.81	12868.9	5452.08	3598.44	9.99845	231.77	3244.78	25325.7	2867.48	0	0	0	0	0	100.994	13779.5	11482.9	0	143.696	5978.46	39989.1	5534.35	6392.16	2711.13	479412	683511	338424	38.9113	48.8651	9467.86	14741	4976.24	7655.53	75.7933
[truncated: 51 more columns]

## Sheet: DB_ProductionFE_fromUtility
STATES AND YEARS ANALIZED				COTTON			RICE			BANANA			COCOA			COFFE			SUGARCANE			BEANS			ORANGE			CASSAVA			CORN			SOYBEAN			WHEAT			CROP PRODUCTION PR-GE-ME
CODST	STATE	YEAR	REGION	ALGPRTOT	ALGGETOT	ALGMETOT	ARRPRTOT	ARRGETOT	ARRMETOT	BANPRTOT	BANGETOT	BANMETOT	CACPRTOT	CACGETOT	CACMETOT	CAFPRTOT	CAFGETOT	CAFMETOT	CANPRTOT	CANGETOT	CANMETOT	FEIPRTOT	FEIGETOT	FEIMETOT	LARPRTOT	LARGETOT	LARMETOT	MANPRTOT	MANGETOT	MANMETOT	MILPRTOT	MILGETOT	MILMETOT	SOJPRTOT	SOJGETOT	SOJMETOT	TRIPRTOT	TRIGETOT	TRIMETOT	CROPPPRTOT	CROPPGETOT	CROPPMETOT
11	Rondônia	1975	NORTE	11.7167	1269.37	621.597	15812.9	3.85932e+06	1.5528e+06	6552.62	774343	77716.9	0.80842	129.536	18.527	141.971	19370.3	16141.9	20.5608	6577.29	791.885	2277.71	290972	84676.1	5.19318	1432.29	747.343	2212.35	401500	191453	4867.04	1.10412e+06	509509	28.2097	2349.59	1067.64	0	0	0	31931.1	6.46139e+06	2.43554e+06
12	Acre	1975	NORTE	0	0	0	1780.87	434642	174878	3700.07	437248	43884.4	0	0	0	4.96692	677.678	564.732	117.851	37700	4538.96	1360.4	173787	50574	3.67868	1014.58	529.393	6854.39	1.24394e+06	593168	2438.03	553085	255227	0	0	0	0	0	0	16260.3	2.8821e+06	1.12336e+06
13	Amazonas	1975	NORTE	0	0	0	389.061	94955	38205.1	9644.74	1.13975e+06	114391	226.358	36270.1	5187.56	13.659	1863.62	1553.01	152.043	48637.6	5855.82	1000.39	127798	37190.6	34.5615	9532.11	4973.7	46487.2	8.43655e+06	4.02293e+06	1266.11	287226	132544	0	0	0	0	0	0	59214.1	1.01826e+07	4.36283e+06
14	Roraima	1975	NORTE	0	0	0	485.886	118586	47713.1	783.094	92540.5	9287.83	0	0	0	0.27594	37.6488	31.374	2.31644	741.017	89.2161	176.855	22592.7	6574.74	5.24871	1447.6	755.334	604.92	109782	52348.8	572.822	129949	59966.3	0	0	0	0	0	0	2631.42	475676	176767
15	Pará	1975	NORTE	25.0684	2715.86	1329.93	23604.4	5.76094e+06	2.31791e+06	18623.1	2.20075e+06	220878	702.517	112567	16100	47.0478	6419.12	5349.27	3170.31	1.01416e+06	122102	3155.69	403132	117316	67.6405	18655.3	9734.04	88930.3	1.61392e+07	7.69588e+06	11404.8	2.58727e+06	1.19392e+06	0	0	0	0	0	0	149731	2.82458e+07	1.17005e+07
16	Amapá	1975	NORTE	0	0	0	102.742	25075.5	10089.1	2023.16	239083	23995.5	0.80842	129.536	18.527	0.96579	131.771	109.809	14.1858	4537.96	546.357	20.7694	2653.24	772.123	5.16125	1423.48	742.749	3209.8	582518	277771	156.714	35551.7	16405.7	0	0	0	0	0	0	5534.31	891104	330451
17	Tocantins	1975	NORTE	0	0	0	0	0	0	0	0	0	0	0	0	0	0	0	0	0	0	0	0	0	0	0	0	0	0	0	0	0	0	0	0	0	0	0	0	0	0	0
21	Maranhão	1975	NORDESTE	143.326	15527.7	7603.73	112584	2.74775e+07	1.10556e+07	14758	1.744e+06	175036	6.06315	971.52	138.952	11.3135	1543.6	1286.33	1346.29	430671	51851.5	6900.79	881559	256544	260.697	71900.7	37516.6	51194.5	9.29084e+06	4.43029e+06	19852.6	4.5037e+06	2.07828e+06	9.40322	783.197	355.881	0	0	0	207067	4.4419e+07	1.80945e+07
22	Piauí	1975	NORDESTE	611.996	66302.5	32467.6	16812.5	4.10328e+06	1.65095e+06	4585.83	541921	54389.9	0	0	0	1.65564	225.893	188.244	3772.97	1.20695e+06	145313	13858.2	1.77035e+06	515193	63.3704	17477.6	9119.55	12380.5	2.24682e+06	1.07139e+06	17657	4.00561e+06	1.84843e+06	2.13709	177.999	80.8821	0	0	0	69746.1	1.39591e+07	5.32753e+06
23	Ceará	1975	NORDESTE	10314.3	1.11743e+06	547194	9553.65	2.33168e+06	938151	43941.8	5.19274e+06	521169	1.21263	194.304	27.7905	536.979	73264.6	61053.8	21690.6	6.93868e+06	835396	29952.9	3.82641e+06	1.11353e+06	66.8492	18437.1	9620.17	26092.7	4.73534e+06	2.25802e+06	42692.6	9.68512e+06	4.4693e+06	5.12903	427.199	194.117	0	0	0	184849	3.39197e+07	1.07537e+07
24	Rio Grande do Norte	1975	NORDESTE	5944.48	644014	315367	1094.41	267103	107469	3069.97	362787	36411.1	0	0	0	0.41391	56.4732	47.061	10844.7	3.46915e+06	417675	9521.2	1.21631e+06	353960	8.50538	2345.8	1224	7157.38	1.29893e+06	619388	6540.77	1.48382e+06	684725	0	0	0	0	0	0	44181.8	8.74452e+06	2.53627e+06
25	Paraíba	1975	NORDESTE	6704.98	726405	355713	2710.96	661643	266212	11702.1	1.38287e+06	138792	0	0	0	29.8015	4066.07	3388.39	36358.9	1.1631e+07	1.40034e+06	20063.6	2.56307e+06	745882	199.776	55098.4	28749.4	15660.1	2.84202e+06	1.3552e+06	17310	3.92689e+06	1.81211e+06	0.427419	35.5999	16.1764	0	0	0	110741	2.37931e+07	6.1064e+06
26	Pernambuco	1975	NORDESTE	3051.53	330597	161890	1411.57	344511	138614	39009.7	4.6099e+06	462672	1.61684	259.072	37.054	1196.61	163264	136053	271143	8.67369e+07	1.04429e+07	31249.1	3.992e+06	1.16172e+06	216.134	59610.1	31103.5	39461	7.16143e+06	3.41489e+06	26656.9	6.04731e+06	2.7906e+06	20.9435	1744.39	792.645	0	0	0	413418	1.09448e+08	1.87412e+07
27	Alagoas	1975	NORDESTE	2316.37	250952	122888	1927.55	470442	189282	10707.6	1.26535e+06	126997	0	0	0	16.5564	2258.93	1882.44	221205	7.07622e+07	8.51956e+06	18320.5	2.3404e+06	681082	30.9287	8530.16	4450.9	8487.18	1.54026e+06	734467	7020.74	1.59271e+06	734972	0	0	0	0	0	0	270033	7.82332e+07	1.11156e+07
28	Sergipe	1975	NORDESTE	509.27	55173.4	27017.8	2780.72	678667	273061	2158.04	255022	25595.2	0	0	0	4.41504	602.381	501.984	14547.2	4.65356e+06	560274	3401.46	434528	126453	458.644	126495	66002.7	12481.1	2.26508e+06	1.08009e+06	4447.02	1.00884e+06	465539	0	0	0	0	0	0	40787.8	9.47797e+06	2.62454e+06
29	Bahia	1975	NORDESTE	6217.23	673564	329837	2716.75	663056	266780	58569	6.92127e+06	694653	117218	1.87823e+07	2.68635e+06	2297.61	313483	261236	14829.1	4.74373e+06	571131	51506.2	6.57979e+06	1.91479e+06	730.551	201487	105132	123654	2.24409e+07	1.07008e+07	38071.6	8.63681e+06	3.98555e+06	35.4758	2954.79	1342.64	0	0	0	415846	6.99593e+07	2.15176e+07
31	Minas Gerais	1975	SUDESTE	14878.6	1.61192e+06	789342	70986.6	1.73251e+07	6.97076e+06	38633.3	4.56541e+06	458207	4.0421	647.68	92.635	40402.7	5.51248e+06	4.59373e+06	71514.1	2.2877e+07	2.75431e+06	58734.3	7.50316e+06	2.1835e+06	1176.03	324350	169240	21049.5	3.82008e+06	1.82159e+06	259845	5.89477e+07	2.72021e+07	20406.7	1.69968e+06	772327	124.081	30643	9406.52	597755	1.24218e+08	4.77246e+07
32	Espírito Santo	1975	SUDESTE	114.715	12428	6085.87	4718.84	1.15169e+06	463382	30262.8	3.57625e+06	358930	3828.68	613482	87743.9	14967.5	2.04215e+06	1.70179e+06	9565.24	3.05987e+06	368398	6987.65	892654	259773	193.092	53254.9	27787.6	10291.5	1.86771e+06	890609	20491.6	4.64866e+06	2.14517e+06	53.4274	4449.99	2022.05	0	0	0	101475	1.79226e+07	6.31169e+06
33	Rio de Janeiro	1975	SUDESTE	38.42	4162.36	2038.26	8410.27	2.05263e+06	825873	48163.3	5.6916e+06	571237	1.21263	194.304	27.7905	543.464	74149.3	61791.1	126723	4.05378e+07	4.88063e+06	2227.68	284580	82816	2707.13	746631	389580	7700.35	1.39747e+06	666375	8430.9	1.91261e+06	882595	19.2339	1601.99	727.939	0	0	0	204965	5.27034e+07	8.36369e+06
35	São Paulo	1975	SUDESTE	107559	1.16527e+07	5.70621e+06	65970.5	1.61009e+07	6.47819e+06	69222.3	8.1802e+06	821006	5.65894	906.752	129.689	117237	1.59956e+07	1.33297e+07	661735	2.11685e+08	2.54863e+07	29371.1	3.75208e+06	1.0919e+06	23166	6.38921e+06	3.33378e+06	11122.2	2.01847e+06	962497	289219	6.56114e+07	3.02771e+07	269093	2.24129e+07	1.01843e+07	5695.91	1.40666e+06	431803	1.6494e+06	3.65206e+08	9.81028e+07
41	Paraná	1975	SUL	74366.7	8.05676e+06	3.94531e+06	87070.1	2.12505e+07	8.55013e+06	7124.34	841905	84497.7	0	0	0	164876	2.24954e+07	1.87462e+07	32344.7	1.03469e+07	1.24573e+06	114079	1.45733e+07	4.241e+06	328.37	90564.8	47255.2	19281.4	3.49922e+06	1.66858e+06	462157	1.04844e+08	4.83812e+07	1.3263e+06	1.10468e+08	5.01962e+07	63389.7	1.56546e+07	4.80553e+06	2.35132e+06	3.12121e+08	1.41912e+08
42	Santa Catarina	1975	SUL	0	0	0	26145.7	6.38116e+06	2.56746e+06	25147.6	2.97176e+06	298261	0	0	0	126.381	17243.2	14369.3	9612.15	3.07487e+06	370205	29967.1	3.82822e+06	1.11406e+06	348.951	96241.2	50217	55353.8	1.00457e+07	4.79023e+06	223901	5.07936e+07	2.34393e+07	115775	9.64294e+06	4.38171e+06	3530.4	871864	267638	489908	8.77235e+07	3.72934e+07
43	Rio Grande do Sul	1975	SUL	0.272482	29.5203	14.4558	236234	5.76556e+07	2.31977e+07	10520.4	1.24323e+06	124777	0	0	0	3.72519	508.259	423.549	11929.1	3.81605e+06	459440	35038.6	4.4761e+06	1.30259e+06	1494.53	412193	215075	68687	1.24654e+07	5.94406e+06	290466	6.58943e+07	3.04076e+07	1.88896e+06	1.57332e+08	7.14911e+07	186562	4.60732e+07	1.41432e+07	2.7299e+06	3.49369e+08	1.47286e+08
50	Mato Grosso do Sul	1975	CENTRO-OESTE	8662.22	938449	459548	73712.5	1.79904e+07	7.23843e+06	3233.03	382057	38345.1	0	0	0	1821.2	248482	207068	200.497	64137.7	7721.99	3066.01	391674	113982	81.643	22517.3	11749.1	4099.86	744047	354795	17534.7	3.97788e+06	1.83564e+06	71798.3	5.9801e+06	2.71733e+06	987.487	243869	74860.7	185197	3.09836e+07	1.30595e+07
51	Mato Grosso	1975	CENTRO-OESTE	725.076	78553.4	38466.8	44785	1.09303e+07	4.3978e+06	5900.38	697265	69981	0	0	0	430.328	58713.3	48927.8	1360.35	435167	52392.7	6542.68	835811	243230	35.7651	9864.05	5146.9	2446.32	443961	211701	12564.6	2.85038e+06	1.31534e+06	2.13709	177.999	80.8821	0	0	0	74792.6	1.63402e+07	6.38307e+06
52	Goiás	1975	CENTRO-OESTE	12842.1	1.39129e+06	681300	138538	3.38118e+07	1.36042e+07	27358	3.23297e+06	324477	1.21263	194.304	27.7905	515.456	70328	58606.6	6483.9	2.07416e+06	249723	24003.8	3.06642e+06	892363	121.116	33403.9	17429.6	4118.6	747448	356417	146904	3.33261e+07	1.53787e+07	35122.3	2.92535e+06	1.32927e+06	0	0	0	396008	8.06795e+07	3.28925e+07
53	Distrito Federal	1975	CENTRO-OESTE	0	0	0	144.418	35247	14181.6	1219.94	144163	14469	0	0	0	3.17331	432.961	360.801	65.2816	20883.2	2514.27	166.155	21225.9	6176.98	11.1346	3070.94	1602.36	156.945	28482.5	13581.7	325.826	73915.8	34109.3	0.854838	71.1998	32.3528	0.666208	164.526	50.5048	2094.39	327657	87078.9
11	Rondônia	1985	NORTE	81.7447	8856.08	4336.73	28319.2	6.91165e+06	2.7809e+06	5022.67	593544	59571	3966.92	635633	90912	8961.98	1.22276e+06	1.01896e+06	85.8807	27472.7	3307.63	10758.2	1.37434e+06	399948	23.8364	6574.12	3430.27	3866.33	701666	334586	15706.2	3.56306e+06	1.64421e+06	537.266	44749.1	20333.8	0	0	0	77330.3	1.50903e+07	6.3605e+06
12	Acre	1985	NORTE	0.272482	29.5203	14.4558	2426.78	592285	238306	4865.65	574988	57708.7	34.3578	5505.28	787.398	57.6715	7868.6	6557.17	38.1352	12199.2	1468.75	1693.97	216400	62974.8	13.5181	3728.31	1945.37	3546.49	643621	306907	3136.98	711646	328397	0.427419	35.5999	16.1764	0	0	0	15814.3	2.76831e+06	1.00508e+06
13	Amazonas	1985	NORTE	3.26979	354.243	173.469	904.913	220855	88860.8	29888.4	3.532e+06	354489	868.243	139122	19898	48.4275	6607.36	5506.14	135.177	43242.3	5206.24	1557.08	198913	57885.8	63.1816	17425.6	9092.38	41409.5	7.51505e+06	3.58351e+06	1982.31	449701	207519	5.12903	427.199	194.117	0	0	0	76865.7	1.21237e+07	4.33234e+06
14	Roraima	1985	NORTE	0	0	0	2861.55	698395	280999	1306.5	154393	15495.6	1.21263	194.304	27.7905	2.34549	320.015	266.679	12.1948	3901.05	469.675	168.987	21587.7	6282.27	10.4488	2881.8	1503.68	897.898	162952	77702.7	1289.02	292423	134942	8.9758	747.598	339.705	0	0	0	6559.13	1.3378e+06	518029
15	Pará	1985	NORTE	900.555	97564.5	47776.3	39473.2	9.6339e+06	3.8762e+06	30377.6	3.58981e+06	360291	9025.61	1.4462e+06	206845	461.51	62967.6	52473	2714.34	868300	104541	13965.9	1.7841e+06	519194	76.157	21004.2	10959.6	102205	1.85484e+07	8.84469e+06	20715.1	4.69937e+06	2.16858e+06	139.339	11605.6	5273.51	0	0	0	220055	4.07632e+07	1.61968e+07
16	Amapá	1985	NORTE	0	0	0	46.2089	11277.8	4537.63	944.141	111572	11197.9	6.06315	971.52	138.952	1.79361	244.717	203.931	28.0845	8984.06	1081.65	34.6157	4422.07	1286.87	2.7722	764.575	398.943	2017.09	366063	174555	109.417	24822	11454.4	0	0	0	0	0	0	3190.18	529122	204856
17	Tocantins	1985	NORTE	59.9461	6494.46	3180.27	50129.1	1.22346e+07	4.92258e+06	16519.5	1.95215e+06	195928	18.9979	3044.1	435.385	14.6248	1995.39	1662.82	2372.71	759015	91383.1	2205.02	281686	81973.7	27.3111	7532.43	3930.3	2776.17	503823	240245	9538.14	2.1638e+06	998507	12837.1	1.06921e+06	485843	0	0	0	96498.5	1.89833e+07	7.02567e+06
21	Maranhão	1985	NORDESTE	849.873	92073.7	45087.5	98124.2	2.39484e+07	9.63562e+06	17741.4	2.09655e+06	210421	8.0842	1295.36	185.27	16.9703	2315.4	1929.5	15197.1	4.86147e+06	585306	8903.15	1.13736e+06	330983	141.165	38933.6	20314.9	44887	8.14614e+06	3.88444e+06	28181.3	6.39314e+06	2.95018e+06	3457.39	287967	130851	0	0	0	217508	4.70056e+07	1.77953e+07
22	Piauí	1985	NORDESTE	4050.45	438819	214885	19318.8	4.71499e+06	1.89707e+06	2663.32	314733	31588.2	0	0	0	1.3797	188.244	156.87	5997.73	1.91864e+06	230998	16679.4	2.13075e+06	620073	47.473	13093.1	6831.77	11857.4	2.15189e+06	1.02612e+06	24153.3	5.47934e+06	2.5285e+06	60.6935	5055.18	2297.05	0	0	0	84829.9	1.71675e+07	6.55852e+06
23	Ceará	1985	NORDESTE	33665.2	3.64723e+06	1.78601e+06	13038	3.18207e+06	1.2803e+06	33997.1	4.01754e+06	403221	0	0	0	524.838	71608	59673.3	25751.1	8.23761e+06	991783	27955	3.57118e+06	1.03925e+06	34.2894	9457.07	4934.54	18590.3	3.37379e+06	1.60877e+06	41716	9.46358e+06	4.36707e+06	7.69354	640.798	291.176	0.499656	123.394	37.8786	195280	3.55748e+07	1.15414e+07
24	Rio Grande do Norte	1985	NORDESTE	7266.56	787246	385506	1298.13	316824	127474	3824.88	451997	45364.7	0	0	0	3.03534	414.137	345.114	48742.3	1.55924e+07	1.87728e+06	9774.21	1.24863e+06	363366	8.5498	2358.05	1230.39	13632.4	2.47402e+06	1.17972e+06	5295.41	1.2013e+06	554353	0	0	0	0	0	0	89845.5	2.20752e+07	4.53464e+06
25	Paraíba	1985	NORDESTE	9874.76	1.06981e+06	523877	3396.29	828905	333509	30882.9	3.64952e+06	366284	0	0	0	18.6259	2541.29	2117.74	106774	3.41564e+07	4.11233e+06	19405.9	2.47905e+06	721432	102.469	28261	14746.1	10845.2	1.96821e+06	938530	21646.4	4.91063e+06	2.26607e+06	50.8629	4236.39	1924.99	0	0	0	202998	4.90976e+07	9.28082e+06
26	Pernambuco	1985	NORDESTE	4239.83	459335	224932	3533.91	862492	347023	74852.9	8.84559e+06	887787	2.02105	323.84	46.3175	1011.73	138039	115033	454943	1.45534e+08	1.75218e+07	30470.3	3.8925e+06	1.13276e+06	135.853	37468.4	19550.4	38182.5	6.92941e+06	3.30425e+06	36697	8.32498e+06	3.84165e+06	139.339	11605.6	5273.51	0	0	0	644208	1.75035e+08	2.74001e+07
27	Alagoas	1985	NORDESTE	7434.14	805401	394396	2249	548895	220848	10172.2	1.20208e+06	120646	0.40421	64.768	9.2635	12.2793	1675.37	1396.14	475603	1.52143e+08	1.83175e+07	12425.8	1.58736e+06	461940	35.9081	9903.49	5167.48	8311.66	1.50841e+06	719278	7097.01	1.61001e+06	742956	45.7338	3809.19	1730.88	0	0	0	523387	1.5942e+08	2.09859e+07
28	Sergipe	1985	NORDESTE	2489.94	269756	132097	2872.76	701130	282099	3200.82	378250	37963.1	0	0	0	1.93158	263.542	219.618	27018.2	8.64298e+06	1.04059e+06	3374.71	431111	125458	1776.93	490080	255716	16632.2	3.01844e+06	1.43933e+06	7642.89	1.73384e+06	800101	8.54838	711.998	323.528	0	0	0	65019	1.56666e+07	4.11389e+06
29	Bahia	1985	NORDESTE	39064.2	4.23214e+06	2.07243e+06	7548.79	1.84237e+06	741278	73274.6	8.65908e+06	869068	171776	2.75242e+07	3.93667e+06	14636.8	1.99702e+06	1.66419e+06	38860.1	1.24311e+07	1.49667e+06	101353	1.29476e+07	3.7679e+06	1153.9	318248	166056	116746	2.11872e+07	1.0103e+07	58610.9	1.32963e+07	6.13572e+06	25791.7	2.1482e+06	976134	23.8169	5881.8	1805.55	648840	1.06589e+08	3.19309e+07
31	Minas Gerais	1985	SUDESTE	42672.1	4.62302e+06	2.26384e+06	81709.9	1.99423e+07	8.02376e+06	51726.5	6.11267e+06	613498	5.65894	906.752	129.689	185227	2.52721e+07	2.106e+07	214838	6.87254e+07	8.27433e+06	67071.3	8.5682e+06	2.49344e+06	2403.26	662823	345850	24817.5	4.50391e+06	2.14767e+06	324120	7.3529e+07	3.39308e+07	272932	2.27326e+07	1.03296e+07	3075.05	759411	233118	1.2706e+06	2.35432e+08	8.9716e+07
32	Espírito Santo	1985	SUDESTE	9.2644	1003.69	491.496	8551.29	2.08704e+06	839721	46850.7	5.53649e+06	555670	4892.56	783952	112125	66065.8	9.01391e+06	7.51159e+06	46149.7	1.4763e+07	1.77742e+06	13764.8	1.75841e+06	511719	180.29	49724.2	25945.3	18125.8	3.28948e+06	1.56857e+06	21777.9	4.94047e+06	2.27983e+06	89.3306	7440.38	3380.87	0	0	0	226457	4.2231e+07	1.51865e+07
33	Rio de Janeiro	1985	SUDESTE	0	0	0	10727.5	2.61818e+06	1.05342e+06	56483.4	6.67481e+06	669917	1.61684	259.072	37.054	2384.4	325323	271103	153744	4.91817e+07	5.92132e+06	2961.53	378328	110098	2586.2	713278	372177	7174.9	1.30211e+06	620904	10158.1	2.30444e+06	1.06341e+06	7.69354	640.798	291.176	0	0	0	246229	6.3499e+07	1.00827e+07
35	São Paulo	1985	SUDESTE	155593	1.68567e+07	8.25455e+06	40177	9.80568e+06	3.94531e+06	82339.6	9.73031e+06	976583	52.5473	8419.84	1204.26	144672	1.97389e+07	1.6449e+07	2.39304e+06	7.65518e+08	9.2166e+07	58125.1	7.42533e+06	2.16086e+06	70278.3	1.93828e+07	1.01136e+07	19846.7	3.6018e+06	1.7175e+06	336233	7.6277e+07	3.51988e+07	406987	3.38981e+07	1.54031e+07	43724.6	1.07982e+07	3.31473e+06	3.75107e+06	9.73041e+08	1.89701e+08
41	Paraná	1985	SUL	230706	2.49943e+07	1.22394e+07	23518	5.73986e+06	2.30943e+06	17856.1	2.11011e+06	211782	0	0	0	78530.6	1.07146e+07	8.92882e+06	198601	6.35313e+07	7.64898e+06	134537	1.71868e+07	5.00155e+06	649.162	179040	93419.9	51733.1	9.38859e+06	4.4769e+06	559284	1.26878e+08	5.85491e+07	1.77863e+06	1.48143e+08	6.73153e+07	393229	9.71115e+07	2.98105e+07	3.46727e+06	5.05976e+08	1.96585e+08
42	Santa Catarina	1985	SUL	4.35972	472.324	231.292	41252.2	1.00681e+07	4.05089e+06	52865.9	6.24732e+06	627012	0	0	0	81.6782	11144	9286.7	17379.4	5.55958e+06	669357	78039.5	9.96935e+06	2.90119e+06	451.368	124488	64955.7	49087.1	8.90839e+06	4.24792e+06	261815	5.93945e+07	2.74083e+07	222142	1.85023e+07	8.40737e+06	6375.28	1.57443e+06	483306	729494	1.2036e+08	4.88698e+07
43	Rio Grande do Sul	1985	SUL	0	0	0	445381	1.087e+08	4.37356e+07	17133.4	2.02471e+06	203210	0	0	0	3.44925	470.61	392.175	20020.5	6.40445e+06	771076	41408.8	5.28988e+06	1.53941e+06	1657.22	457065	238489	68166.2	1.23709e+07	5.899e+06	327213	7.42306e+07	3.42545e+07	2.44093e+06	2.03306e+08	9.23813e+07	150684	3.72128e+07	1.14233e+07	3.5126e+06	4.49997e+08	1.90446e+08
50	Mato Grosso do Sul	1985	CENTRO-OESTE	24653.9	2.67096e+06	1.30794e+06	29632.5	7.23216e+06	2.90986e+06	3528.95	417027	41854.9	0.40421	64.768	9.2635	875.282	119422	99518.3	46981.6	1.50292e+07	1.80946e+06	7658.25	978322	284703	57.8482	15954.6	8324.86	7349.25	1.33375e+06	635992	34268.8	7.77412e+06	3.58746e+06	774432	6.45028e+07	2.93098e+07	39653.5	9.79279e+06	3.00611e+06	969093	1.09866e+08	4.3001e+07
51	Mato Grosso	1985	CENTRO-OESTE	3263.79	353594	173151	76672.1	1.87127e+07	7.52906e+06	21948.8	2.59375e+06	260322	419.974	67294	9624.78	4844.95	661038	550865	20797.1	6.65287e+06	800984	7020.06	896795	260977	44.1844	12186.1	6358.51	5548.89	1.00702e+06	480192	32328.1	7.33387e+06	3.38429e+06	688371	5.73347e+07	2.60526e+07	60.1253	14848.5	4558.06	861319	9.56407e+07	3.9513e+07
52	Goiás	1985	CENTRO-OESTE	26703.8	2.89304e+06	1.41669e+06	97111.7	2.37013e+07	9.53619e+06	18858.7	2.22859e+06	223672	0	0	0	1924.13	262525	218771	84985.6	2.71864e+07	3.27316e+06	31998.4	4.08772e+06	1.18957e+06	219.775	60614.3	31627.5	3018.37	547778	261205	203192	4.60955e+07	2.12713e+07	494825	4.12141e+07	1.87275e+07	71.1177	17563.2	5391.39	962908	1.48295e+08	5.61551e+07
53	Distrito Federal	1985	CENTRO-OESTE	0.272482	29.5203	14.4558	1185.82	289413	116445	769.002	90875.3	9120.69	0	0	0	101.96	13911.2	11592.7	93.9978	30069.3	3620.26	276.925	35376.5	10295	10.6501	2937.32	1532.64	138.091	25060.9	11950.2	1191.73	270352	124757	28318.2	2.35863e+06	1.07175e+06	44.4694	10982.1	3371.2	32131.1	3.12764e+06	1.36445e+06
11	Rondônia	1995	NORTE	580.388	62878.2	30790.8	11036.7	2.69365e+06	1.08379e+06	4259.71	503382	50522	1456.77	233424	33385.7	10888.3	1.48558e+06	1.23799e+06	440.833	141020	16978.3	15083	1.92681e+06	560725	71.6773	19768.7	10315	2979.39	540703	257831	18020.1	4.08799e+06	1.88645e+06	643.266	53577.8	24345.5	0	0	0	65460.2	1.17488e+07	5.19312e+06
12	Acre	1995	NORTE	6.53958	708.486	346.938	2510.39	612690	246516	6939.14	820018	82301.1	6.46736	1036.29	148.216	49.8072	6795.61	5663.01	54.3886	17398.6	2094.74	1689.56	215837	62811	30.4192	8389.65	4377.58	6943.04	1.26003e+06	600840	3745.24	849635	392073	6.41128	533.998	242.646	0	0	0	21981.4	3.79307e+06	1.39741e+06
13	Amazonas	1995	NORTE	4.35972	472.324	231.292	809.474	197562	79488.8	34059.5	4.02492e+06	403961	399.359	63990.8	9152.34	38.2177	5214.36	4345.3	163.625	52342.7	6301.9	1239.56	158350	46081.7	84.8581	23404	12211.8	46916.2	8.51441e+06	4.06005e+06	1758.62	398956	184103	11.5403	961.197	436.763	0	0	0	85485.4	1.34406e+07	4.80637e+06
14	Roraima	1995	NORTE	4.08724	442.804	216.836	3842.77	937872	377353	3955.73	467460	46916.7	2.42526	388.608	55.581	4.96692	677.678	564.732	11.1228	3558.1	428.385	176.54	22552.5	6563.04	10.0948	2784.17	1452.73	1404.05	254808	121504	1957.24	444015	204895	286.371	23851.9	10838.2	0	0	0	11655.4	2.15841e+06	770788
15	Pará	1995	NORTE	279.567	30287.8	14831.6	24875.5	6.07116e+06	2.44273e+06	21326.7	2.52024e+06	252944	6087.81	975471	139518	885.078	120759	100632	1064.3	340463	40990.7	8025.17	1.0252e+06	298344	589.282	162525	84802.8	75973.7	1.37878e+07	6.57464e+06	18554.5	4.20923e+06	1.94239e+06	94.887	7903.17	3591.17	1.16586	287.921	88.3834	157758	2.92513e+07	1.18955e+07
16	Amapá	1995	NORTE	0	0	0	68.9985	16839.9	6775.53	829.395	98012.1	9836.98	9.70104	1554.43	222.324	2.7594	376.488	313.74	47.3435	15144.9	1823.4	46.8885	5989.89	1743.13	28.1259	7757.17	4047.56	1241.04	225225	107398	48.3753	10974.3	5064.2	0	0	0	0	0	0	2322.63	381875	137224
17	Tocantins	1995	NORTE	54.769	5933.57	2905.61	32885.6	8.02612e+06	3.22931e+06	7057.91	834054	83709.8	12.5305	2007.81	287.169	1.3797	188.244	156.87	1717.1	549289	66132.7	604.201	77185.2	22461.8	22.0235	6074.1	3169.37	1699.03	308341	147031	9482.22	2.15111e+06	992653	6025.75	501887	228055	0	0	0	59562.5	1.24622e+07	4.77587e+06
21	Maranhão	1995	NORDESTE	510.905	55350.5	27104.5	70667.5	1.72472e+07	6.93942e+06	19525	2.30733e+06	231575	0.80842	129.536	18.527	7.45038	1016.52	847.098	15875.5	5.07847e+06	611432	6235.54	796575	231812	78.3211	21601.1	11271.1	32519.4	5.90167e+06	2.81418e+06	24033.6	5.4522e+06	2.51598e+06	57753.7	4.81033e+06	2.18579e+06	0	0	0	227208	4.16719e+07	1.55694e+07
22	Piauí	1995	NORDESTE	1479.85	160325	78509.2	20230.9	4.9376e+06	1.98664e+06	3621.56	427970	42953.2	0	0	0	0.82782	112.946	94.122	9618.77	3.07699e+06	370460	16571.8	2.117e+06	616072	40.2892	11111.8	5797.95	11992	2.17633e+06	1.03777e+06	20266	4.59749e+06	2.12156e+06	8673.61	722428	328268	0	0	0	92495.6	1.82273e+07	6.58812e+06
23	Ceará	1995	NORDESTE	1545.25	167409	81978.6	14045.1	3.42787e+06	1.3792e+06	56044.5	6.62295e+06	664712	0	0	0	390.869	53329.5	44441.3	19705	6.30352e+06	758924	38379.3	4.90287e+06	1.42679e+06	88.4243	24387.5	12725	15047.9	2.73091e+06	1.30222e+06	50015.7	1.13464e+07	5.23593e+06	25.6451	2135.99	970.585	0	0	0	195288	3.55818e+07	1.09079e+07
24	Rio Grande do Norte	1995	NORDESTE	1737.89	188280	92198.8	877.339	214125	86153.1	4360.36	515277	51715.8	0	0	0	2.48346	338.839	282.366	60946.1	1.94963e+07	2.34729e+06	9818.89	1.25434e+06	365027	6.81041	1878.32	980.077	7254.98	1.31664e+06	627835	7337.81	1.66463e+06	768164	1.70968	142.4	64.7057	0	0	0	92344.4	2.4652e+07	4.33971e+06
25	Paraíba	1995	NORDESTE	2319.64	251306	123062	2534.81	618652	248914	24604	2.90753e+06	291814	0	0	0	8.55414	1167.11	972.594	167171	5.34772e+07	6.43849e+06	16813.8	2.14792e+06	625068	62.5334	17246.8	8999.09	6261.1	1.13627e+06	541825	17109.7	3.88147e+06	1.79115e+06	33.3387	2776.79	1261.76	0	0	0	236919	6.44415e+07	1.00716e+07
26	Pernambuco	1995	NORDESTE	403.002	43660.5	21380.1	1620.33	395461	159114	66259	7.83002e+06	785860	3.63789	582.912	83.3715	732.483	99938.7	83282.3	293275	9.3817e+07	1.12953e+07	36848.4	4.70729e+06	1.36987e+06	106.666	29418.7	15350.2	16467.8	2.98859e+06	1.42509e+06	27894.3	6.32803e+06	2.92014e+06	85.0564	7084.38	3219.11	0	0	0	443696	1.16247e+08	1.80787e+07
27	Alagoas	1995	NORDESTE	741.425	80324.6	39334.1	1193.37	291257	117187	8281.87	978693	98226.5	0	0	0	5.79474	790.625	658.854	393332	1.25824e+08	1.51489e+07	20522.4	2.62168e+06	762939	217.389	59956.2	31284.1	10802.1	1.96038e+06	934795	9069.48	2.05748e+06	949445	37.6129	3132.79	1423.53	0	0	0	444203	1.33878e+08	1.80842e+07
28	Sergipe	1995	NORDESTE	100.546	10893	5334.17	697.414	170212	68484.8	4477.12	529075	53100.6	0	0	0	4.00113	545.908	454.923	12641.3	4.04386e+06	486869	6195.26	791429	230315	3598.59	992495	517867	8284.8	1.50354e+06	716953	7418.93	1.68304e+06	776656	36.3306	3025.99	1375	0	0	0	43454.2	9.72811e+06	2.85741e+06
29	Bahia	1995	NORDESTE	11927.4	1.29219e+06	632772	7383.22	1.80196e+06	725019	33799.9	3.99423e+06	400881	87102.8	1.39568e+07	1.99618e+06	13188.1	1.79937e+06	1.49947e+06	28394.1	9.08311e+06	1.09358e+06	83595.6	1.06791e+07	3.10775e+06	2214.46	610750	318679	48364.1	8.77717e+06	4.18535e+06	80328.9	1.82232e+07	8.40929e+06	308306	2.56789e+07	1.16684e+07	63.1232	15588.8	4785.33	704668	9.59124e+07	3.40422e+07
31	Minas Gerais	1995	SUDESTE	12718.9	1.37795e+06	674766	21050	5.13749e+06	2.06707e+06	51211.1	6.05177e+06	607386	20.2105	3238.4	463.175	207879	2.83627e+07	2.36356e+07	226148	7.23435e+07	8.70994e+06	64772.2	8.27449e+06	2.40797e+06	4425.11	1.22045e+06	636811	17323.7	3.14392e+06	1.49916e+06	412647	9.36119e+07	4.31983e+07	369674	3.07903e+07	1.3991e+07	1438.34	355212	109040	1.38931e+06	2.50673e+08	9.75374e+07
32	Espírito Santo	1995	SUDESTE	0.544965	59.0405	28.9115	2134.04	520839	209559	27245.2	3.21965e+06	323140	2491.95	399295	57109.5	91850.4	1.25319e+07	1.04433e+07	34132.1	1.09187e+07	1.31457e+06	6670.44	852132	247980	173.368	47815.2	24949.2	8641.9	1.56834e+06	747856	10146.5	2.30182e+06	1.0622e+06	2.99193	249.199	113.235	1.66552	411.315	126.262	183491	3.23612e+07	1.44309e+07
33	Rio de Janeiro	1995	SUDESTE	5.72213	619.926	303.571	2171.94	530088	213281	16163.1	1.91005e+06	191702	0	0	0	1296.23	176855	147379	109310	3.49676e+07	4.20999e+06	1603.02	204782	59593.8	351.05	96820	50519.1	2250.39	408404	194745	4534.88	1.02877e+06	474737	0.854838	71.1998	32.3528	0.333104	82.263	25.2524	137687	3.93241e+07	5.54231e+06
35	São Paulo	1995	SUDESTE	41139.1	4.45694e+06	2.18252e+06	7286.52	1.77836e+06	715523	77628.9	9.17364e+06	920712	60.6315	9715.2	1389.53	47039.2	6.41795e+06	5.34829e+06	2.94376e+06	9.41692e+08	1.13377e+08	54746.6	6.99374e+06	2.03526e+06	92050	2.53875e+07	1.32468e+07	11555.7	2.09714e+06	1.00001e+06	367912	8.34634e+07	3.85151e+07	363512	3.0277e+07	1.37577e+07	3547.06	875978	268900	4.01024e+06	1.11262e+09	1.91369e+08
41	Paraná	1995	SUL	72873.5	7.89499e+06	3.86609e+06	17887.5	4.36565e+06	1.75652e+06	13191.8	1.55892e+06	156460	13.7431	2202.11	314.959	15103.9	2.06074e+06	1.71729e+06	353063	1.12943e+08	1.35979e+07	120147	1.53485e+07	4.46659e+06	1393.35	384287	200514	79960.7	1.45114e+07	6.91967e+06	889255	2.01734e+08	9.30923e+07	2.59474e+06	2.16117e+08	9.82026e+07	141520	3.49495e+07	1.07285e+07	4.29915e+06	6.1187e+08	2.34705e+08
42	Santa Catarina	1995	SUL	0	0	0	62634.2	1.52866e+07	6.15056e+06	49920.7	5.89928e+06	592081	0	0	0	35.3203	4819.05	4015.87	9920.39	3.17347e+06	382076	70265.1	8.97619e+06	2.61217e+06	657.793	181420	94662.1	23975.2	4.35105e+06	2.07477e+06	310618	7.04659e+07	3.25173e+07	174756	1.45555e+07	6.61394e+06	7454.53	1.84096e+06	565123	710237	1.24735e+08	5.16067e+07
43	Rio Grande do Sul	1995	SUL	4.08724	442.804	216.836	584905	1.42753e+08	5.74366e+07	14713.7	1.73876e+06	174511	0.40421	64.768	9.2635	2.06955	282.366	235.305	23686.8	7.57726e+06	912278	32984.7	4.21371e+06	1.22624e+06	1594.85	439862	229513	45763.6	8.30523e+06	3.96031e+06	388800	8.82021e+07	4.07018e+07	1.81789e+06	1.51413e+08	6.88012e+07	76271.3	1.88359e+07	5.78208e+06	2.98661e+06	4.23479e+08	1.79225e+08
50	Mato Grosso do Sul	1995	CENTRO-OESTE	20901.9	2.26447e+06	1.10889e+06	20447	4.99033e+06	2.00786e+06	3045.81	359933	36124.6	1.21263	194.304	27.7905	163.908	22363.4	18636.2	98790.2	3.16024e+07	3.80483e+06	3969.16	507050	147557	51.8166	14291.1	7456.85	13600.5	2.46824e+06	1.17697e+06	178952	4.05966e+07	1.87337e+07	768070	6.39728e+07	2.90689e+07	5765.86	1.42393e+06	437106	1.11376e+06	1.48223e+08	5.65481e+07
51	Mato Grosso	1995	CENTRO-OESTE	12676.2	1.37331e+06	672496	74075.7	1.80791e+07	7.2741e+06	18250.7	2.15674e+06	216461	187.149	29987.6	4289	1275.95	174088	145073	158694	5.07651e+07	6.11196e+06	3675.87	469583	136654	51.9429	14325.9	7475.03	2430.86	441155	210363	162859	3.69456e+07	1.7049e+07	1.89602e+06	1.5792e+08	7.1758e+07	0	0	0	2.33019e+06	2.68369e+08	1.03586e+08
52	Goiás	1995	CENTRO-OESTE	39838.6	4.31604e+06	2.11352e+06	25322.6	6.18028e+06	2.48663e+06	19796.8	2.33944e+06	234798	0	0	0	501.521	68426.7	57022.2	127481	4.07806e+07	4.90986e+06	26677.7	3.40801e+06	991768	433.051	119436	62319.8	6181.29	1.12179e+06	534919	400420	9.08382e+07	4.19183e+07	837789	6.97798e+07	3.17076e+07	1612.22	398153	122222	1.48605e+06	2.1935e+08	8.51389e+07
53	Distrito Federal	1995	CENTRO-OESTE	0	0	0	65.4731	15979.5	6429.33	209.362	24740.9	2483.12	0	0	0	220.752	30119	25099.2	127.098	40657.9	4895.09	2047.67	261585	76124.3	43.5986	12024.5	6274.21	93.377	16946.2	8080.69	14421.3	3.27159e+06	1.50971e+06	21468.4	1.78811e+06	812509	1016.3	250984	77045.1	39713.4	5.71273e+06	2.52865e+06
11	Rondônia	2006	NORTE	0	0	0	11805.8	2.88135e+06	1.15931e+06	1613.83	190711	19140.7	2405.86	385499	55136.4	10801	1.47367e+06	1.22806e+06	619.505	198176	23859.8	8562.98	1.0939e+06	318337	32.9259	9081.01	4738.32	5132.06	931373	444120	20985	4.7606e+06	2.19683e+06	53506	4.45654e+06	2.02503e+06	0	0	0	115465	1.63809e+07	7.47456e+06
12	Acre	2006	NORTE	0	0	0	7613.76	1.85823e+06	747657	4605.25	544216	54620.2	0	0	0	137.004	18692.6	15577.2	27.8165	8898.32	1071.33	4513.26	576557	167785	13.8297	3814.26	1990.22	11015	1.99902e+06	953223	11189.1	2.53833e+06	1.17134e+06	0	0	0	0	0	0	39115.1	7.54776e+06	3.11326e+06
13	Amazonas	2006	NORTE	0	0	0	820.176	200174	80539.8	7647.59	903738	90703.7	533.961	85558.5	12237.1	61.2587	8358.03	6965.03	648.298	207387	24968.7	1614.98	206309	60038.4	65.0449	17939.5	9360.52	20019.4	3.63315e+06	1.73245e+06	2783.67	631494	291410	0	0	0	0	0	0	34194.4	5.89411e+06	2.30867e+06
14	Roraima	2006	NORTE	0	0	0	9107.55	2.22281e+06	894345	2647.42	312853	31399.5	0	0	0	3.31128	451.786	376.488	6.47073	2069.95	249.215	62.6229	7999.92	2328.07	5.17965	1428.55	745.396	373.786	67835.1	32346.8	2120.83	481125	222021	3908.75	325561	147933	0	0	0	18235.9	3.42213e+06	1.33174e+06
15	Pará	2006	NORTE	0	0	0	33204.9	8.10405e+06	3.26066e+06	7448.25	880182	88339.5	11657.4	1.86791e+06	267159	244.207	33319.2	27766	433.462	138662	16694.5	13168.7	1.68227e+06	489561	791.185	218210	113858	171066	3.10452e+07	1.48038e+07	39695.1	9.00511e+06	4.15551e+06	23996.2	1.99865e+06	908177	0	0	0	301705	5.49736e+07	2.41315e+07
16	Amapá	2006	NORTE	0	0	0	107.401	26212.5	10546.6	111.51	13177.4	1322.55	1.21263	194.304	27.7905	0.13797	18.8244	15.687	35.3975	11323.5	1363.31	13.8463	1768.83	514.749	29.1171	8030.53	4190.2	902.959	163870	78140.6	108.609	24638.6	11369.8	0	0	0	0	0	0	1310.19	249235	107491
17	Tocantins	2006	NORTE	0	0	0	28716.2	7.00854e+06	2.81988e+06	3114.57	368058	36940.2	0	0	0	0	0	0	3235.52	1.03502e+06	124614	1252.46	159998	46561.3	10.6716	2943.25	1535.74	2674.73	485413	231467	13943.3	3.16313e+06	1.45966e+06	212997	1.77406e+07	8.06126e+06	0	0	0	265945	2.99637e+07	1.27819e+07
21	Maranhão	2006	NORDESTE	25479.3	2.76038e+06	1.35173e+06	137583	3.35788e+07	1.35104e+07	12459.5	1.47237e+06	147775	0	0	0	0.41391	56.4732	47.061	14339.4	4.58708e+06	552271	12289.2	1.56991e+06	456863	17.6906	4879.1	2545.83	60290	1.09415e+07	5.2174e+06	84518.3	1.91736e+07	8.84786e+06	328768	2.73832e+07	1.24428e+07	0	0	0	675745	1.01472e+08	4.25297e+07
22	Piauí	2006	NORDESTE	56.6764	6140.21	3006.8	37674	9.19478e+06	3.69951e+06	8343.49	985975	98957.3	0	0	0	0.13797	18.8244	15.687	10571.5	3.38175e+06	407153	28884.9	3.68997e+06	1.07382e+06	5.09289	1404.62	732.91	11297.4	2.05026e+06	977658	44815	1.01666e+07	4.69149e+06	240079	1.99962e+07	9.0862e+06	0	0	0	381727	4.94732e+07	2.00386e+07
23	Ceará	2006	NORDESTE	795.921	86228.7	42225.3	21170.2	5.16684e+06	2.07888e+06	96061.5	1.13519e+07	1.13933e+06	0	0	0	144.593	19728	16440	13740.3	4.39545e+06	529198	133895	1.71048e+07	4.97768e+06	39.1727	10803.9	5637.29	23700.5	4.30119e+06	2.051e+06	215086	4.87939e+07	2.25165e+07	556.927	46386.6	21077.9	0	0	0	505191	9.12772e+07	3.33779e+07
24	Rio Grande do Norte	2006	NORDESTE	658.863	71380	34954	1504.24	367128	147714	10646.3	1.25811e+06	126270	0	0	0	0.13797	18.8244	15.687	28469.3	9.10715e+06	1.09647e+06	23485.8	3.00025e+06	873107	0.130142	35.8933	18.7285	6404.58	1.16231e+06	554242	18788.9	4.26239e+06	1.96693e+06	4.70161	391.599	177.941	21.9849	5429.36	1666.66	89984.9	1.92346e+07	4.80157e+06
25	Paraíba	2006	NORDESTE	1209	130981	64140.2	3993.35	974625	392140	32673.9	3.86117e+06	387526	0	0	0	1.24173	169.42	141.183	68777.1	2.20014e+07	2.6489e+06	31960	4.08281e+06	1.18814e+06	129.483	35711.4	18633.6	5137.68	932392	444606	27239.4	6.17946e+06	2.85158e+06	0	0	0	4.1638	1028.29	315.655	171125	3.81998e+07	7.99613e+06
26	Pernambuco	2006	NORDESTE	50.9542	5520.29	2703.23	1657.85	404619	162798	94943.7	1.12198e+07	1.12607e+06	0	0	0	292.91	39964.2	33303.5	328334	1.05032e+08	1.26455e+07	54018.1	6.90067e+06	2.00817e+06	99.1768	27353.1	14272.4	18151	3.29407e+06	1.57076e+06	65572.9	1.48757e+07	6.86454e+06	17.5242	1459.6	663.233	0	0	0	563138	1.41801e+08	2.44288e+07
27	Alagoas	2006	NORDESTE	180.656	19571.9	9584.17	2575.36	628547	252895	10464.3	1.2366e+06	124112	0	0	0	5.79474	790.625	658.854	654071	2.09233e+08	2.51911e+07	44452.2	5.67866e+06	1.65255e+06	1376.48	379636	198088	27493.2	4.98949e+06	2.37921e+06	21709.7	4.925e+06	2.2727e+06	0	0	0	0	0	0	762328	2.27092e+08	3.20809e+07
28	Sergipe	2006	NORDESTE	0	0	0	2040.74	498068	200397	5624.82	664702	66712.8	0	0	0	0	0	0	12809.1	4.09756e+06	493333	7330.66	936473	272524	4101.84	1.13129e+06	590290	13227.3	2.40051e+06	1.14467e+06	27953.9	6.34154e+06	2.92637e+06	0	0	0	0	0	0	73088.4	1.60701e+07	5.6943e+06
29	Bahia	2006	NORDESTE	180986	1.96077e+07	9.6017e+06	2705.67	660352	265692	99213.4	1.17243e+07	1.17671e+06	62876.1	1.00749e+07	1.44097e+06	21003.7	2.86571e+06	2.38809e+06	54641.4	1.74795e+07	2.10448e+06	148286	1.89432e+07	5.51268e+06	3565.7	983424	513134	47388.7	8.60015e+06	4.10094e+06	233430	5.29552e+07	2.44368e+07	1.00085e+06	8.33608e+07	3.78787e+07	0	0	0	1.85494e+06	2.27255e+08	8.94199e+07
31	Minas Gerais	2006	SUDESTE	7873.65	853018	417713	15856.3	3.86992e+06	1.55706e+06	71830.8	8.48846e+06	851944	25.8694	4145.15	592.864	178775	2.43918e+07	2.03265e+07	383233	1.22594e+08	1.47599e+07	97638.9	1.24731e+07	3.62982e+06	1793.28	494588	258068	23468.3	4.25905e+06	2.03091e+06	689630	1.56448e+08	7.21944e+07	854203	7.11469e+07	3.23288e+07	4251.41	1.04992e+06	322296	2.32858e+06	4.06072e+08	1.48678e+08
32	Espírito Santo	2006	SUDESTE	0	0	0	474.05	115698	46550.9	20613.1	2.43591e+06	244480	2835.13	454283	64974.2	55787.2	7.61151e+06	6.34293e+06	72677.5	2.32491e+07	2.79912e+06	3702.93	473040	137660	91.6806	25285.6	13193.6	10787	1.95764e+06	933491	6989.48	1.58561e+06	731699	0	0	0	0	0	0	173958	3.79081e+07	1.13141e+07
33	Rio de Janeiro	2006	SUDESTE	0	0	0	900.129	219687	88391	11169.9	1.31998e+06	132480	0.80842	129.536	18.527	1427.44	194757	162298	68483.2	2.19074e+07	2.63758e+06	2155.3	275334	80125.3	168.785	46551.2	24289.7	3666.12	665331	317260	2866	650172	300029	0	0	0	0	0	0	90837.7	2.52793e+07	3.74247e+06
35	São Paulo	2006	SUDESTE	9600.1	1.04006e+06	509305	4238.75	1.03452e+06	416238	125116	1.47853e+07	1.48392e+06	0	0	0	38567.4	5.26208e+06	4.38507e+06	4.57961e+06	1.46499e+09	1.76381e+08	45588.9	5.82386e+06	1.69481e+06	87043.4	2.40067e+07	1.25263e+07	35008.6	6.3534e+06	3.02959e+06	308016	6.98756e+07	3.22449e+07	407993	3.39819e+07	1.54412e+07	11201	2.76618e+06	849137	5.65199e+06	1.62992e+09	2.48961e+08
41	Paraná	2006	SUL	5086.98	551114	269874	10830	2.64319e+06	1.06349e+06	28027.6	3.31211e+06	332419	0	0	0	23210.1	3.16675e+06	2.63896e+06	448622	1.43512e+08	1.72784e+07	153221	1.95736e+07	5.69614e+06	2018.89	556813	290536	69337.5	1.25835e+07	6.00036e+06	1.23907e+06	2.81092e+08	1.29713e+08	3.7436e+06	3.11805e+08	1.41683e+08	156340	3.86096e+07	1.18521e+07	5.87936e+06	8.17405e+08	3.16818e+08
42	Santa Catarina	2006	SUL	0	0	0	106268	2.5936e+07	1.04353e+07	128762	1.52162e+07	1.52717e+06	0	0	0	1.93158	263.542	219.618	2769.43	885925	106663	58137	7.42686e+06	2.1613e+06	633.93	174839	91227.9	33194.7	6.0242e+06	2.87261e+06	553835	1.25641e+08	5.79786e+07	309824	2.58053e+07	1.17258e+07	16016.1	3.95533e+06	1.21417e+06	1.20944e+06	2.11066e+08	8.81131e+07
43	Rio Grande do Sul	2006	SUL	0	0	0	709030	1.73047e+08	6.96254e+07	16664.3	1.96927e+06	197645	0	0	0	1.10376	150.595	125.496	13841.5	4.42781e+06	533094	33738.3	4.30999e+06	1.25425e+06	851.232	234771	122500	32616.8	5.91934e+06	2.82261e+06	688861	1.56273e+08	7.21139e+07	3.38705e+06	2.82109e+08	1.28189e+08	168204	4.15394e+07	1.27514e+07	5.05086e+06	6.69829e+08	2.8761e+08
50	Mato Grosso do Sul	2006	CENTRO-OESTE	17730.2	1.92085e+06	940622	11660	2.84576e+06	1.14499e+06	460.051	54365.6	5456.4	0	0	0	191.916	26184.7	21820.6	214798	6.87125e+07	8.27277e+06	4013.22	512678	149195	11.2703	3108.36	1621.89	19423.4	3.52497e+06	1.68087e+06	292903	6.6447e+07	3.06627e+07	1.64956e+06	1.37393e+08	6.24306e+07	6606.95	1.63165e+06	500869	2.21736e+06	2.83072e+08	1.05812e+08
51	Mato Grosso	2006	CENTRO-OESTE	302975	3.28238e+07	1.60734e+07	40197.8	9.81075e+06	3.94735e+06	4586.7	542024	54400.2	18.1895	2914.56	416.858	907.705	123846	103205	149119	4.77023e+07	5.74321e+06	5347.18	683089	198787	7.99939	2206.24	1151.18	6025.51	1.09352e+06	521438	555377	1.25991e+08	5.814e+07	4.92561e+06	4.10256e+08	1.86418e+08	0	0	0	5.99017e+06	6.29031e+08	2.71202e+08
52	Goiás	2006	CENTRO-OESTE	28845.8	3.1251e+06	1.53033e+06	13768.9	3.36045e+06	1.35208e+06	13570.4	1.60366e+06	160951	0	0	0	418.187	57056.8	47547.3	316994	1.01404e+08	1.22088e+07	30845.4	3.94042e+06	1.14671e+06	345.249	95220.2	49684.3	3833.85	695772	331775	397151	9.00964e+07	4.1576e+07	2.34406e+06	1.95238e+08	8.87151e+07	1681.68	415305	127487	3.15152e+06	4.00032e+08	1.47246e+08
53	Distrito Federal	2006	CENTRO-OESTE	1358.05	147129	72047.5	92.1659	22494.2	9050.53	241.769	28570.5	2867.48	0	0	0	100.994	13779.5	11482.9	143.696	45967.5	5534.35	9103.29	1.16292e+06	338424	87.7764	24208.8	12631.8	431.18	78251.1	37313.6	16451.9	3.73223e+06	1.72228e+06	48057.3	4.00271e+06	1.81881e+06	652.551	161153	49469.5	76720.7	9.41942e+06	4.07991e+06

## Sheet: Results_Crop&Beef
STATES AND YEARS ANALIZED				CROP HYPOTHETICAL POTENTIAL UTILITY						BEEF UTILITY						BEEF&CROP RELATION (BEEF / CROP)
CODST	STATE	YEAR	REGION	CROPHPRHUM	CROPHGEHUM	CROPHMEHUM	CROPHPRHA	CROPHGEHA	CROPHMEHA	BEEFPRTOT	BEEFGETOT	BEEFMETOT	BEEFPRHA	BEEFGEHA	BEEFMEHA	BEECROPRR	BEECROGER	BEECROMER
11	Rondônia	1975	NORTE	15437.8	2.73516e+06	2.37978e+06	0.079797	14.1379	12.301	387.969	21996.1	14833.4	0.00172761	0.0979476	0.0660526	0.0251312	0.00804199	0.0062331
12	Acre	1975	NORTE	5019	1.40503e+06	1.11646e+06	0.121859	34.1134	27.107	818.042	46354.2	31259.5	0.00659159	0.373511	0.251882	0.162989	0.0329916	0.0279989
13	Amazonas	1975	NORTE	10479.2	5.77417e+06	4.35823e+06	0.0512344	28.2307	21.308	1376.13	77861.8	52505.9	0.00715302	0.404719	0.272921	0.13132	0.0134845	0.0120475
14	Roraima	1975	NORTE	941.647	211530	174530	0.0347497	7.80613	6.44069	1701.98	96638.3	65171.2	0.00125777	0.0714163	0.0481619	1.80745	0.456853	0.37341
15	Pará	1975	NORTE	41154.4	1.4739e+07	1.16108e+07	0.0584557	20.9353	16.4919	10257.5	581312	392015	0.00337729	0.191398	0.129072	0.249244	0.0394403	0.0337631
16	Amapá	1975	NORTE	832.33	430615	329617	0.0332122	17.1827	13.1526	502.589	28456.4	19189.7	0.00143587	0.0812988	0.0548241	0.603833	0.0660833	0.0582181
17	Tocantins	1975	NORTE	0	0	0	0	0	0	0	0	0	0	0	0	0	0	0
21	Maranhão	1975	NORDESTE	97546.6	2.07657e+07	1.76779e+07	0.0923776	19.6653	16.7412	13374.9	765533	516327	0.00351154	0.200989	0.13556	0.137113	0.0368653	0.0292074
22	Piauí	1975	NORDESTE	34111.2	6.32811e+06	5.24503e+06	0.0496858	9.21743	7.63982	11250.8	650968	439141	0.0030409	0.175945	0.118692	0.329828	0.102869	0.0837252
23	Ceará	1975	NORDESTE	61828	1.27038e+07	1.04396e+07	0.0288899	5.93602	4.87805	15138	869399	586421	0.00420215	0.241336	0.162784	0.244841	0.0684361	0.0561725
24	Rio Grande do Norte	1975	NORDESTE	13026.7	2.91107e+06	2.37656e+06	0.0157658	3.52316	2.87626	5402.59	308678	208190	0.00323917	0.185071	0.124822	0.41473	0.106036	0.0876013
25	Paraíba	1975	NORDESTE	30433.5	7.16426e+06	5.90267e+06	0.0266712	6.27859	5.17296	8570.64	489639	330240	0.00435224	0.248642	0.167698	0.281619	0.0683447	0.0559476
26	Pernambuco	1975	NORDESTE	50090.4	2.17081e+07	1.86334e+07	0.0320815	13.9035	11.9342	11567.7	663318	447408	0.00425608	0.244054	0.164614	0.230936	0.0305562	0.024011
27	Alagoas	1975	NORDESTE	20612.5	1.24286e+07	1.10449e+07	0.0286608	17.2815	15.3574	4504.13	256156	172753	0.00585051	0.332727	0.224392	0.218514	0.0206101	0.0156409
28	Sergipe	1975	NORDESTE	9512.18	3.15742e+06	2.56094e+06	0.0397763	13.2031	10.7089	5498.28	312207	210548	0.00470516	0.267172	0.180177	0.578025	0.0988805	0.0822151
29	Bahia	1975	NORDESTE	145789	2.89495e+07	2.12764e+07	0.0547341	10.8686	7.98789	59178.4	3.37624e+06	2.27707e+06	0.00527477	0.300936	0.202963	0.405919	0.116625	0.107023
31	Minas Gerais	1975	SUDESTE	319629	5.54078e+07	4.70901e+07	0.0802924	13.9187	11.8293	135045	7.64529e+06	5.15561e+06	0.00422924	0.23943	0.16146	0.422505	0.137982	0.109484
32	Espírito Santo	1975	SUDESTE	41221.4	7.603e+06	6.27206e+06	0.0630299	11.6254	9.59034	14192.2	803479	541828	0.00666126	0.377121	0.254312	0.344293	0.105679	0.0863874
33	Rio de Janeiro	1975	SUDESTE	17405.1	9.20791e+06	8.09622e+06	0.0281844	14.9105	13.1103	11182	632980	426850	0.00601496	0.340488	0.229608	0.642457	0.068743	0.0527222
35	São Paulo	1975	SUDESTE	627337	1.08896e+08	9.49921e+07	0.121119	21.0243	18.34	77404.5	4.38261e+06	2.95542e+06	0.00681623	0.385932	0.260254	0.123386	0.0402459	0.0311123
41	Paraná	1975	SUL	1.83299e+06	1.7062e+08	1.49564e+08	0.325718	30.3189	26.5771	45163.4	2.56131e+06	1.72727e+06	0.00906379	0.514025	0.346643	0.0246392	0.0150117	0.0115487
42	Santa Catarina	1975	SUL	300469	4.49471e+07	3.79879e+07	0.209469	31.3344	26.4829	15311.6	868196	585484	0.00636914	0.361142	0.243543	0.0509589	0.0193159	0.0154124
43	Rio Grande do Sul	1975	SUL	2.18676e+06	1.80409e+08	1.61198e+08	0.368794	30.4257	27.1859	93625.8	5.34654e+06	3.60601e+06	0.00679783	0.388193	0.26182	0.0428149	0.0296357	0.02237
50	Mato Grosso do Sul	1975	CENTRO-OESTE	127026	1.4625e+07	1.30957e+07	0.0996577	11.474	10.2742	59599.5	3.37071e+06	2.27301e+06	0.00286626	0.162104	0.109313	0.46919	0.230475	0.173569
51	Mato Grosso	1975	CENTRO-OESTE	41762.5	7.06648e+06	6.20508e+06	0.0833139	14.0972	12.3788	20853.2	1.17971e+06	795529	0.0018547	0.104924	0.0707548	0.499329	0.166944	0.128206
52	Goiás	1975	CENTRO-OESTE	232764	3.70405e+07	3.22983e+07	0.0908848	14.4628	12.6111	85668	4.84825e+06	3.26941e+06	0.00293744	0.16624	0.112104	0.368046	0.130891	0.101226
53	Distrito Federal	1975	CENTRO-OESTE	506.583	102808	85559.3	0.0397726	8.07161	6.71738	277.852	15754.4	10624.3	0.00254695	0.144414	0.0973883	0.548483	0.153241	0.124175
11	Rondônia	1985	NORTE	47660.6	7.39359e+06	6.25994e+06	0.0898337	13.9359	11.7991	5211.12	295019	198947	0.00473361	0.267986	0.180717	0.109338	0.039902	0.0317809
12	Acre	1985	NORTE	5651.9	1.21552e+06	994960	0.0822465	17.6882	14.4787	2266.43	128348	86552	0.00695169	0.393673	0.265476	0.401003	0.105591	0.0869904
13	Amazonas	1985	NORTE	11963.3	5.66485e+06	4.32329e+06	0.0417164	19.7536	15.0755	2934.16	166094	112006	0.00616246	0.348839	0.235241	0.245264	0.0293202	0.0259076
14	Roraima	1985	NORTE	2966.82	589786	507113	0.106605	21.1925	18.2218	2108.5	119656	80693.5	0.00169057	0.0959389	0.0646991	0.710693	0.202881	0.159123
15	Pará	1985	NORTE	72047.3	2.02272e+07	1.60284e+07	0.0667952	18.7527	14.8599	25036.7	1.41851e+06	956583	0.00379551	0.215043	0.145016	0.347503	0.0701286	0.0596806
16	Amapá	1985	NORTE	524.032	267920	204434	0.0157509	8.05291	6.14469	631.937	35754.8	24111.1	0.00131958	0.0746613	0.0503475	1.20591	0.133453	0.117941
17	Tocantins	1985	NORTE	51632.9	7.79444e+06	6.94034e+06	0.0788345	11.9008	10.5967	24357.8	1.37899e+06	929927	0.00228692	0.129472	0.0873098	0.471749	0.17692	0.133989
21	Maranhão	1985	NORDESTE	97456	2.04464e+07	1.74438e+07	0.074707	15.6736	13.3719	23790.1	1.35543e+06	914133	0.00436792	0.24886	0.167837	0.244112	0.066292	0.0524046
22	Piauí	1985	NORDESTE	41766.3	7.64258e+06	6.37893e+06	0.0388543	7.10972	5.93417	13406.2	775152	522914	0.00377631	0.218348	0.147296	0.320982	0.101425	0.0819753
23	Ceará	1985	NORDESTE	60198.7	1.26792e+07	1.06138e+07	0.0253397	5.33713	4.46771	19183.7	1.10112e+06	742717	0.00549126	0.315192	0.2126	0.318672	0.0868444	0.0699766
24	Rio Grande do Norte	1985	NORDESTE	13689.8	5.1667e+06	4.34024e+06	0.0133054	5.02163	4.21837	6629.96	378319	255155	0.00431998	0.246507	0.166255	0.484299	0.0732225	0.0587882
25	Paraíba	1985	NORDESTE	33167.3	1.04459e+07	9.00065e+06	0.0269829	8.49813	7.3224	9879.97	563453	380013	0.00498594	0.284347	0.191774	0.297883	0.0539403	0.0422206
26	Pernambuco	1985	NORDESTE	58562.9	3.11078e+07	2.72602e+07	0.0316505	16.8123	14.7329	14186.2	812240	547843	0.00689552	0.394807	0.266291	0.242239	0.0261105	0.0200968
27	Alagoas	1985	NORDESTE	16709	2.28677e+07	2.07815e+07	0.0167356	22.9041	20.8145	5255.78	298492	201299	0.00652312	0.370467	0.249839	0.314547	0.013053	0.00968647
28	Sergipe	1985	NORDESTE	13000.1	4.77017e+06	3.88315e+06	0.0414305	15.2022	12.3753	5987.04	339927	229241	0.00469641	0.266649	0.179824	0.460539	0.071261	0.0590349
29	Bahia	1985	NORDESTE	258373	4.12593e+07	3.09673e+07	0.0621071	9.91781	7.44384	67308	3.83758e+06	2.58818e+06	0.00448605	0.255773	0.172501	0.260507	0.0930111	0.083578
31	Minas Gerais	1985	SUDESTE	748572	1.04667e+08	9.00448e+07	0.140179	19.6001	16.862	135327	7.66426e+06	5.16844e+06	0.00467868	0.264978	0.178689	0.18078	0.0732253	0.0573985
32	Espírito Santo	1985	SUDESTE	102901	1.81831e+07	1.51376e+07	0.0959944	16.9626	14.1215	11910.6	674567	454898	0.00633672	0.358885	0.242016	0.115748	0.0370986	0.030051
33	Rio de Janeiro	1985	SUDESTE	22517.8	1.11122e+07	9.81838e+06	0.0360459	17.7881	15.717	12109.3	685752	462440	0.0068916	0.390274	0.263183	0.537764	0.0617115	0.0470994
35	São Paulo	1985	SUDESTE	860929	2.07236e+08	1.82576e+08	0.131947	31.7613	27.9819	82731.8	4.68465e+06	3.15911e+06	0.00833445	0.471935	0.318251	0.096096	0.0226054	0.017303
41	Paraná	1985	SUL	2.41223e+06	2.33968e+08	2.05926e+08	0.39789	38.5923	33.9669	58883.8	3.338e+06	2.25103e+06	0.00981461	0.55637	0.375197	0.0244105	0.0142669	0.0109313
42	Santa Catarina	1985	SUL	465456	5.91221e+07	5.0282e+07	0.249062	31.6358	26.9056	18764.8	1.06314e+06	716939	0.00759929	0.430546	0.290343	0.0403148	0.0179821	0.0142584
43	Rio Grande do Sul	1985	SUL	2.81583e+06	2.30856e+08	2.07344e+08	0.427153	35.0202	31.4535	96952.1	5.52131e+06	3.7237e+06	0.00747888	0.425914	0.287246	0.0344311	0.0239167	0.0179591
50	Mato Grosso do Sul	1985	CENTRO-OESTE	767419	5.27707e+07	4.81042e+07	0.403274	27.7307	25.2785	100485	5.68223e+06	3.83175e+06	0.00460882	0.26062	0.175746	0.130939	0.107678	0.0796553
51	Mato Grosso	1985	CENTRO-OESTE	696591	4.83493e+07	4.41133e+07	0.327124	22.7051	20.7159	43919.1	2.4841e+06	1.67513e+06	0.00267728	0.151429	0.102115	0.0630486	0.0513782	0.0379734
52	Goiás	1985	CENTRO-OESTE	661642	6.59973e+07	5.86356e+07	0.225955	22.5385	20.0245	97198.1	5.49896e+06	3.70819e+06	0.00465183	0.263176	0.177471	0.146904	0.0833209	0.0632412
53	Distrito Federal	1985	CENTRO-OESTE	27238.6	1.70901e+06	1.56347e+06	0.318602	19.9898	18.2875	521.828	29600.5	19961.8	0.00366439	0.207861	0.140176	0.0191577	0.0173203	0.0127676
11	Rondônia	1995	NORTE	42115	6.18284e+06	5.13508e+06	0.0846745	12.4309	10.3244	26465.9	1.49725e+06	1.00966e+06	0.00905725	0.512395	0.34553	0.62842	0.242162	0.196621
12	Acre	1995	NORTE	6772.4	1.7199e+06	1.38529e+06	0.063668	16.169	13.0233	5704.61	322833	217702	0.00928767	0.525604	0.35444	0.842332	0.187704	0.157152
13	Amazonas	1995	NORTE	12455.5	6.28574e+06	4.79581e+06	0.0375473	18.9485	14.4571	5173.07	292622	197328	0.00978057	0.553252	0.373082	0.415326	0.0465533	0.0411459
14	Roraima	1995	NORTE	4468.26	882681	758297	0.0239791	4.73694	4.06943	2742.73	155544	104895	0.00177803	0.100835	0.0680001	0.613825	0.176218	0.138329
15	Pará	1995	NORTE	51606.8	1.48695e+07	1.17486e+07	0.0410648	11.832	9.34863	43027.2	2.43535e+06	1.64227e+06	0.00577103	0.326641	0.22027	0.83375	0.163781	0.139785
16	Amapá	1995	NORTE	379.745	176017	134525	0.00659864	3.05856	2.33758	1222.28	69113.1	46605.7	0.00498932	0.28212	0.190244	3.21868	0.392651	0.346446
17	Tocantins	1995	NORTE	33059.3	5.2902e+06	4.70125e+06	0.0514191	8.22817	7.31214	35141.4	1.98859e+06	1.341e+06	0.00317214	0.179506	0.121049	1.06298	0.375902	0.285244
21	Maranhão	1995	NORDESTE	122244	1.81694e+07	1.57182e+07	0.0673684	10.0131	8.66223	27460.3	1.55959e+06	1.05176e+06	0.0051709	0.293677	0.198052	0.224635	0.0858361	0.0669139
22	Piauí	1995	NORDESTE	47484.8	7.77712e+06	6.53538e+06	0.0381493	6.24812	5.25052	14113.3	814757	549616	0.00588435	0.339702	0.229155	0.297217	0.104763	0.0840986
23	Ceará	1995	NORDESTE	73759.7	1.30491e+07	1.08024e+07	0.0353664	6.25677	5.17953	18364.2	1.05355e+06	710623	0.00697695	0.400266	0.269981	0.248973	0.0807375	0.065784
24	Rio Grande do Norte	1995	NORDESTE	13694.7	4.99384e+06	4.28968e+06	0.0170155	6.20478	5.32988	6944.28	396172	267195	0.00557228	0.317899	0.214405	0.507077	0.0793322	0.0622878
25	Paraíba	1995	NORDESTE	26740	1.13365e+07	9.99422e+06	0.0302369	12.819	11.3012	9688.3	552859	372873	0.00523145	0.298531	0.201342	0.362315	0.0487681	0.0373088
26	Pernambuco	1995	NORDESTE	51590.7	2.06567e+07	1.80485e+07	0.0350209	14.0222	12.2517	14412.6	823897	555690	0.00676328	0.386624	0.260765	0.279363	0.0398853	0.0307887
27	Alagoas	1995	NORDESTE	23452.3	2.00909e+07	1.80404e+07	0.025451	21.8031	19.5779	6643.86	376722	254050	0.00770361	0.436813	0.294573	0.283292	0.0187509	0.0140823
28	Sergipe	1995	NORDESTE	12902	3.24716e+06	2.53737e+06	0.0415705	10.4624	8.17546	6480.54	367755	248006	0.00561638	0.318716	0.214935	0.50229	0.113254	0.0977414
29	Bahia	1995	NORDESTE	457511	4.33385e+07	3.57199e+07	0.0949804	8.99719	7.41555	63119.1	3.59911e+06	2.42736e+06	0.00435611	0.24839	0.167522	0.137962	0.0830465	0.0679554
31	Minas Gerais	1995	SUDESTE	874762	1.15663e+08	9.93415e+07	0.17796	23.5303	20.2099	135436	7.66863e+06	5.17136e+06	0.00534295	0.302527	0.20401	0.154826	0.0663016	0.0520564
32	Espírito Santo	1995	SUDESTE	108410	1.72621e+07	1.44065e+07	0.124096	19.7598	16.491	12058.7	682619	460325	0.00662179	0.374845	0.252777	0.111233	0.0395444	0.0319526
33	Rio de Janeiro	1995	SUDESTE	7954.2	6.1079e+06	5.50321e+06	0.021205	16.2829	14.6709	12243.6	693082	467380	0.00792401	0.448561	0.302487	1.53926	0.113473	0.0849286
35	São Paulo	1995	SUDESTE	703922	2.09189e+08	1.84821e+08	0.128298	38.127	33.6857	83104.6	4.70388e+06	3.17206e+06	0.00917041	0.519063	0.35003	0.118059	0.0224863	0.0171629
41	Paraná	1995	SUL	3.12092e+06	2.85258e+08	2.52139e+08	0.568728	51.9828	45.9475	67597.3	3.82973e+06	2.58261e+06	0.0101234	0.573543	0.386774	0.0216594	0.0134255	0.0102428
42	Santa Catarina	1995	SUL	458980	6.15027e+07	5.25844e+07	0.266465	35.706	30.5283	21059.2	1.19259e+06	804232	0.00900387	0.509893	0.343849	0.0458827	0.0193909	0.0152941
43	Rio Grande do Sul	1995	SUL	2.32656e+06	2.12727e+08	1.90629e+08	0.372746	34.0818	30.5414	92766.8	5.26966e+06	3.55382e+06	0.00794214	0.451157	0.304257	0.039873	0.0247719	0.0186426
50	Mato Grosso do Sul	1995	CENTRO-OESTE	826055	6.85068e+07	6.14691e+07	0.550008	45.6136	40.9277	131986	7.4632e+06	5.03273e+06	0.00605142	0.342181	0.230746	0.159778	0.108941	0.0818741
51	Mato Grosso	1995	CENTRO-OESTE	1.85396e+06	1.27652e+08	1.16622e+08	0.537977	37.0418	33.8412	96404.1	5.45147e+06	3.67614e+06	0.00449393	0.254123	0.171365	0.0519992	0.0427056	0.0315218
52	Goiás	1995	CENTRO-OESTE	1.04921e+06	1.01586e+08	8.99493e+07	0.433666	41.9878	37.1782	110528	6.25194e+06	4.21595e+06	0.00569594	0.322187	0.217264	0.105344	0.0615436	0.0468703
53	Distrito Federal	1995	CENTRO-OESTE	31036.3	3.0781e+06	2.68353e+06	0.467814	46.3965	40.4491	585.968	33228.3	22408.1	0.00607553	0.344522	0.232336	0.0188801	0.0107951	0.00835026
11	Rondônia	2006	NORTE	87868.3	9.07863e+06	7.81242e+06	0.174382	18.0173	15.5044	57031	3.22462e+06	2.17449e+06	0.0117717	0.665588	0.448832	0.649051	0.355188	0.278337
12	Acre	2006	NORTE	17479.2	3.76317e+06	3.08374e+06	0.106487	22.926	18.7868	11648.5	659004	444396	0.0110799	0.626838	0.422705	0.66642	0.17512	0.144109
13	Amazonas	2006	NORTE	7643.45	2.99471e+06	2.29964e+06	0.00882529	3.45775	2.65521	8124.6	459540	309888	0.00990227	0.560088	0.377691	1.06295	0.153451	0.134755
14	Roraima	2006	NORTE	10768.8	1.48461e+06	1.32778e+06	0.0926307	12.7703	11.4213	3622.32	205087	138301	0.00500379	0.283302	0.191046	0.336372	0.138142	0.104159
15	Pará	2006	NORTE	113850	3.07113e+07	2.41136e+07	0.0604073	16.295	12.7944	95744.1	5.41561e+06	3.65198e+06	0.00864956	0.489249	0.329921	0.840967	0.17634	0.151449
16	Amapá	2006	NORTE	324.379	135852	104562	0.0053069	2.22256	1.71065	1676.82	94840.5	63954.9	0.00629058	0.355794	0.239927	5.16932	0.698119	0.611646
17	Tocantins	2006	NORTE	219013	1.5604e+07	1.42137e+07	0.346634	24.6966	22.4962	44003.2	2.4891e+06	1.67851e+06	0.00542379	0.306803	0.206891	0.200916	0.159517	0.11809
21	Maranhão	2006	NORDESTE	454630	4.98239e+07	4.37476e+07	0.185304	20.3079	17.8312	39792.8	2.2543e+06	1.52021e+06	0.00691814	0.391919	0.264294	0.0875279	0.0452453	0.0347495
22	Piauí	2006	NORDESTE	290105	2.4473e+07	2.16277e+07	0.214699	18.1118	16.006	13540.4	780152	526257	0.00503393	0.290039	0.195648	0.0466739	0.031878	0.0243326
23	Ceará	2006	NORDESTE	256443	4.03445e+07	3.32432e+07	0.133422	20.9905	17.2958	16532.3	947488	639076	0.00632416	0.362447	0.244469	0.0644677	0.0234849	0.0192243
24	Rio Grande do Norte	2006	NORDESTE	31281.6	5.7899e+06	4.77584e+06	0.0463667	8.58198	7.07891	6644.87	379247	255782	0.00553958	0.316164	0.213236	0.212421	0.0655015	0.0535576
25	Paraíba	2006	NORDESTE	45029	9.38787e+06	7.93452e+06	0.0678953	14.1552	11.9638	9848.56	561775	378884	0.00586306	0.334437	0.225558	0.218716	0.0598405	0.0477513
26	Pernambuco	2006	NORDESTE	89253.8	2.81546e+07	2.44004e+07	0.0526408	16.6052	14.3911	14286.8	818193	551861	0.00723306	0.414232	0.279395	0.160069	0.0290607	0.0226169
27	Alagoas	2006	NORDESTE	52873.8	3.59613e+07	3.1943e+07	0.0584763	39.7718	35.3278	6346.9	360191	242906	0.00727584	0.412909	0.278457	0.120039	0.0100161	0.00760434
28	Sergipe	2006	NORDESTE	29047.8	6.6113e+06	5.32408e+06	0.0916033	20.849	16.7897	6223.79	353331	238280	0.00658566	0.373874	0.252135	0.214261	0.0534435	0.0447552
29	Bahia	2006	NORDESTE	1.21892e+06	1.0558e+08	9.15754e+07	0.234373	20.3008	17.6081	72999.9	4.15639e+06	2.80314e+06	0.00567523	0.32313	0.217925	0.0598891	0.0393673	0.0306102
31	Minas Gerais	2006	SUDESTE	1.48252e+06	1.77777e+08	1.5431e+08	0.278399	33.3843	28.9775	136756	7.73905e+06	5.21881e+06	0.00750913	0.424943	0.286559	0.0922456	0.0435324	0.0338203
32	Espírito Santo	2006	SUDESTE	67396.6	1.33926e+07	1.13031e+07	0.0896874	17.8221	15.0415	12020.7	680082	458610	0.00896011	0.506927	0.341844	0.178357	0.0507803	0.0405738
33	Rio de Janeiro	2006	SUDESTE	6553.67	4.19537e+06	3.7241e+06	0.0187542	12.0056	10.657	12969.6	734153	495076	0.0100564	0.56925	0.383874	1.97898	0.174991	0.132939
35	São Paulo	2006	SUDESTE	696666	2.72724e+08	2.44063e+08	0.0998742	39.0978	34.9889	70915.1	4.01325e+06	2.70633e+06	0.0101717	0.575641	0.388182	0.101792	0.0147154	0.0110887
41	Paraná	2006	SUL	4.41294e+06	3.88561e+08	3.44286e+08	0.677681	59.67	52.8708	61627.3	3.48887e+06	2.35273e+06	0.0130221	0.737211	0.49714	0.0139651	0.00897895	0.00683366
42	Santa Catarina	2006	SUL	767724	1.04475e+08	8.99282e+07	0.445669	60.6483	52.204	21097.4	1.19406e+06	805213	0.0123575	0.699402	0.471642	0.0274805	0.0114292	0.00895395
43	Rio Grande do Sul	2006	SUL	4.06189e+06	3.45529e+08	3.10539e+08	0.584029	49.6811	44.6501	78779.4	4.47123e+06	3.01532e+06	0.00852304	0.483736	0.326223	0.0193948	0.0129402	0.00970996
50	Mato Grosso do Sul	2006	CENTRO-OESTE	1.6852e+06	1.29829e+08	1.1718e+08	0.752529	57.975	52.327	137657	7.78253e+06	5.24805e+06	0.00653792	0.369626	0.249253	0.0816855	0.0599446	0.0447861
51	Mato Grosso	2006	CENTRO-OESTE	4.80063e+06	3.27617e+08	2.98583e+08	0.748063	51.0512	46.527	137888	7.79581e+06	5.25701e+06	0.00625256	0.353503	0.238381	0.0287228	0.0237955	0.0176065
52	Goiás	2006	CENTRO-OESTE	2.38976e+06	1.8052e+08	1.63238e+08	0.63137	47.6931	43.1271	121805	6.8873e+06	4.64438e+06	0.00769183	0.434925	0.293287	0.0509694	0.0381525	0.0284516
53	Distrito Federal	2006	CENTRO-OESTE	60844.8	5.02567e+06	4.38423e+06	0.624165	51.5548	44.9747	573.535	32587.9	21977.1	0.00718743	0.408385	0.275412	0.0094262	0.0064843	0.00501276

[truncated: 3 more sheets: Results_Crop&Pasture, Results_Feed2WhiteMeat, Results_Feed&Food]
